# Supplementary material for: Cytotoxic Acetogenins from the Roots of Annona purpurea
Source: PubMed Central journal article supplement (PMC6515252; doi:10.3390/ijms20081870), 2019-04-16
Supplement: ijms-20-01870-s001.pdf [file ijms-20-01870-s001.pdf]

Article

## Cytotoxic Acetogenins from the Roots of *Annona purpurea*

Gustavo A. Hernández-Fuentes <sup>1</sup>, Aída Nelly García-Argáez <sup>2,3</sup>, Ana L. Peraza Campos <sup>1</sup>, Iván Delgado-Enciso <sup>4</sup>, Roberto Muñiz-Valencia <sup>1</sup>, Francisco J. Martínez-Martínez <sup>1</sup>, Antonio Toninello <sup>5</sup>, Zeferino Gómez-Sandoval <sup>1</sup>, Juan Pablo Mojica-Sánchez <sup>1</sup>, Lisa Dalla Via <sup>2, \*</sup>, Hortensia Parra-Delgado <sup>1,\*</sup>.

1. *Facultad de Ciencias Químicas, Universidad de Colima, Carretera Colima-Coquimatlán km 9, 28400, Coquimatlán, Colima, México.*
2. *Dipartimento di Scienze del Farmaco, Università degli Studi di Padova, Via F. Marzolo 5, 35131 Padova, Italy*
3. *Fondazione per la Biologia e la Medicina della Rigenerazione T.E.S.-Tissue Engineering and Signalling Onlus, Via F. Marzolo, 13, 35131 Padova, Italy.*
4. *Facultad de Medicina, Universidad de Colima, Av. Universidad 333, Las Víboras, 28040 Colima, México.*
5. *Dipartimento di Scienze Biomediche, Università degli Studi di Padova, Via G. Colombo 3, 35121, Padova, Italy.*

\* Correspondence:

Prof. Lisa Dalla Via. Phone: +39 (049) 8275712. Fax: +39 (049) 8275366. E-mail: lisa.dallavia@unipd.it.

Prof. Hortensia Parra-Delgado. Phone and fax: +52 (312) 3161163. E-mail: hparra@ucol.mx

# Supplementary files

## Table of Contents

- S1  $^1\text{H}$  NMR (400 MHz,  $\text{CDCl}_3$ ) spectrum of compound 1
- S2  $^{13}\text{C}$  NMR (100 MHz,  $\text{CDCl}_3$ ) spectrum of compound 1
- S3 COSY experiment ( $\text{CDCl}_3$ ) of 1
- S4 HSQC experiment ( $\text{CDCl}_3$ ) of 1
- S5 HMBC experiment ( $\text{CDCl}_3$ ) of 1
- S6 Mass spectrum (IE) of 1
- S7 HRMS (ESI-TOF) of compound 1
- S8 Mass spectrum of the TMSi derivative of 1
- S9 Correlations in COSY and  $^1\text{H}$  NMR spectrum ( $\text{C}_6\text{D}_6$ ) of 1
- S10  $^1\text{H}$  NMR (400 MHz,  $\text{CDCl}_3$ ) spectrum of compound 1a
- S11 COSY experiment ( $\text{CDCl}_3$ ), Mosher ester *R* of 1
- S12 COSY experiment ( $\text{CDCl}_3$ ), Mosher ester *S* of 1
- S13 IR theoretical calculations of 1
  
- S14  $^1\text{H}$  NMR (400 MHz,  $\text{CDCl}_3$ ) spectrum of compound 2
- S15  $^{13}\text{C}$  NMR (100 MHz,  $\text{CDCl}_3$ ) spectrum of compound 2
- S16 COSY experiment ( $\text{CDCl}_3$ ) of 2
- S17 HSQC experiment ( $\text{CDCl}_3$ ) of 2
- S18 HMBC experiment ( $\text{CDCl}_3$ ) of 2
- S19 Mass spectrum (IE) of 2
- S20 HRMS (ESI-TOF) of compound 2
- S21 Mass spectrum of the TMSi derivative of 2
- S22 Correlations in COSY and  $^1\text{H}$  NMR spectrum ( $\text{C}_6\text{D}_6$ ) of 2
- S23  $^1\text{H}$  NMR (400 MHz,  $\text{CDCl}_3$ ) spectrum of compound 2a
- S24 COSY experiment ( $\text{CDCl}_3$ ), Mosher ester *R* of 2

S25 COSY experiment (CDCl<sub>3</sub>), Mosher ester *S* of 2

S26 IR theoretical calculations of 2

S27 <sup>1</sup>H NMR (400 MHz, CDCl<sub>3</sub>) spectrum of compound 3

S28 <sup>13</sup>C NMR (100 MHz, CDCl<sub>3</sub>) spectrum of compound 3

S29 COSY experiment (CDCl<sub>3</sub>) of 3

S30 HSQC experiment (CDCl<sub>3</sub>) of 3

S31 HMBC experiment (CDCl<sub>3</sub>) of 3

S32 Mass spectrum (IE) of 3

S33 HRMS (ESI-TOF) of compound 3

S34 Mass spectrum of the TMSi derivative of 3

S35 Correlations in COSY and <sup>1</sup>H NMR spectrum (C<sub>6</sub>D<sub>6</sub>) of 3

S36 <sup>1</sup>H NMR (400 MHz, CDCl<sub>3</sub>) spectrum of compound 3a

S37 COSY experiment (CDCl<sub>3</sub>), Mosher ester *R* of 3

S38 COSY experiment (CDCl<sub>3</sub>), Mosher ester *S* of 3

S39 IR theoretical calculations of 3

S40 <sup>1</sup>H NMR (400 MHz, CDCl<sub>3</sub>) spectrum of compound 4

S41 <sup>13</sup>C NMR (100 MHz, CDCl<sub>3</sub>) spectrum of compound 4

S42 COSY experiment (CDCl<sub>3</sub>) of 4

S43 HSQC experiment (CDCl<sub>3</sub>) of 4

S44 HMBC experiment (CDCl<sub>3</sub>) of 4

S45 Mass spectrum (IE) of 4

S46 Mass spectrum of the TMSi derivative of 4

S47 HRMS (ESI-TOF) of compound 4

S48 Correlations in COSY and <sup>1</sup>H NMR spectrum (C<sub>6</sub>D<sub>6</sub>) of 4

S49 <sup>1</sup>H NMR (400 MHz, CDCl<sub>3</sub>) spectrum of compound 4a

S50 COSY experiment (CDCl<sub>3</sub>), Mosher ester *R* of 4

S51 COSY experiment (CDCl<sub>3</sub>), Mosher ester *S* of 4

S52 IR theoretical calculations of 4

S53  $^1\text{H}$  NMR (400 MHz,  $\text{CDCl}_3$ ) spectrum of compound 5  
S54  $^{13}\text{C}$  NMR (100 MHz,  $\text{CDCl}_3$ ) spectrum of compound 5  
S55 COSY experiment ( $\text{CDCl}_3$ ) of 5  
S56 HSQC experiment ( $\text{CDCl}_3$ ) of 5  
S57 HMBC experiment ( $\text{CDCl}_3$ ) of 5  
S58 Mass spectrum (IE) of 5  
S59 Mass spectrum ( $\text{ESI}^+$ ) of 5  
S60 HRMS (ESI-TOF) of compound 5  
S61 Correlations in COSY and  $^1\text{H}$  NMR spectrum ( $\text{C}_6\text{D}_6$ ) of 5  
S62 IR theoretical calculations of 5

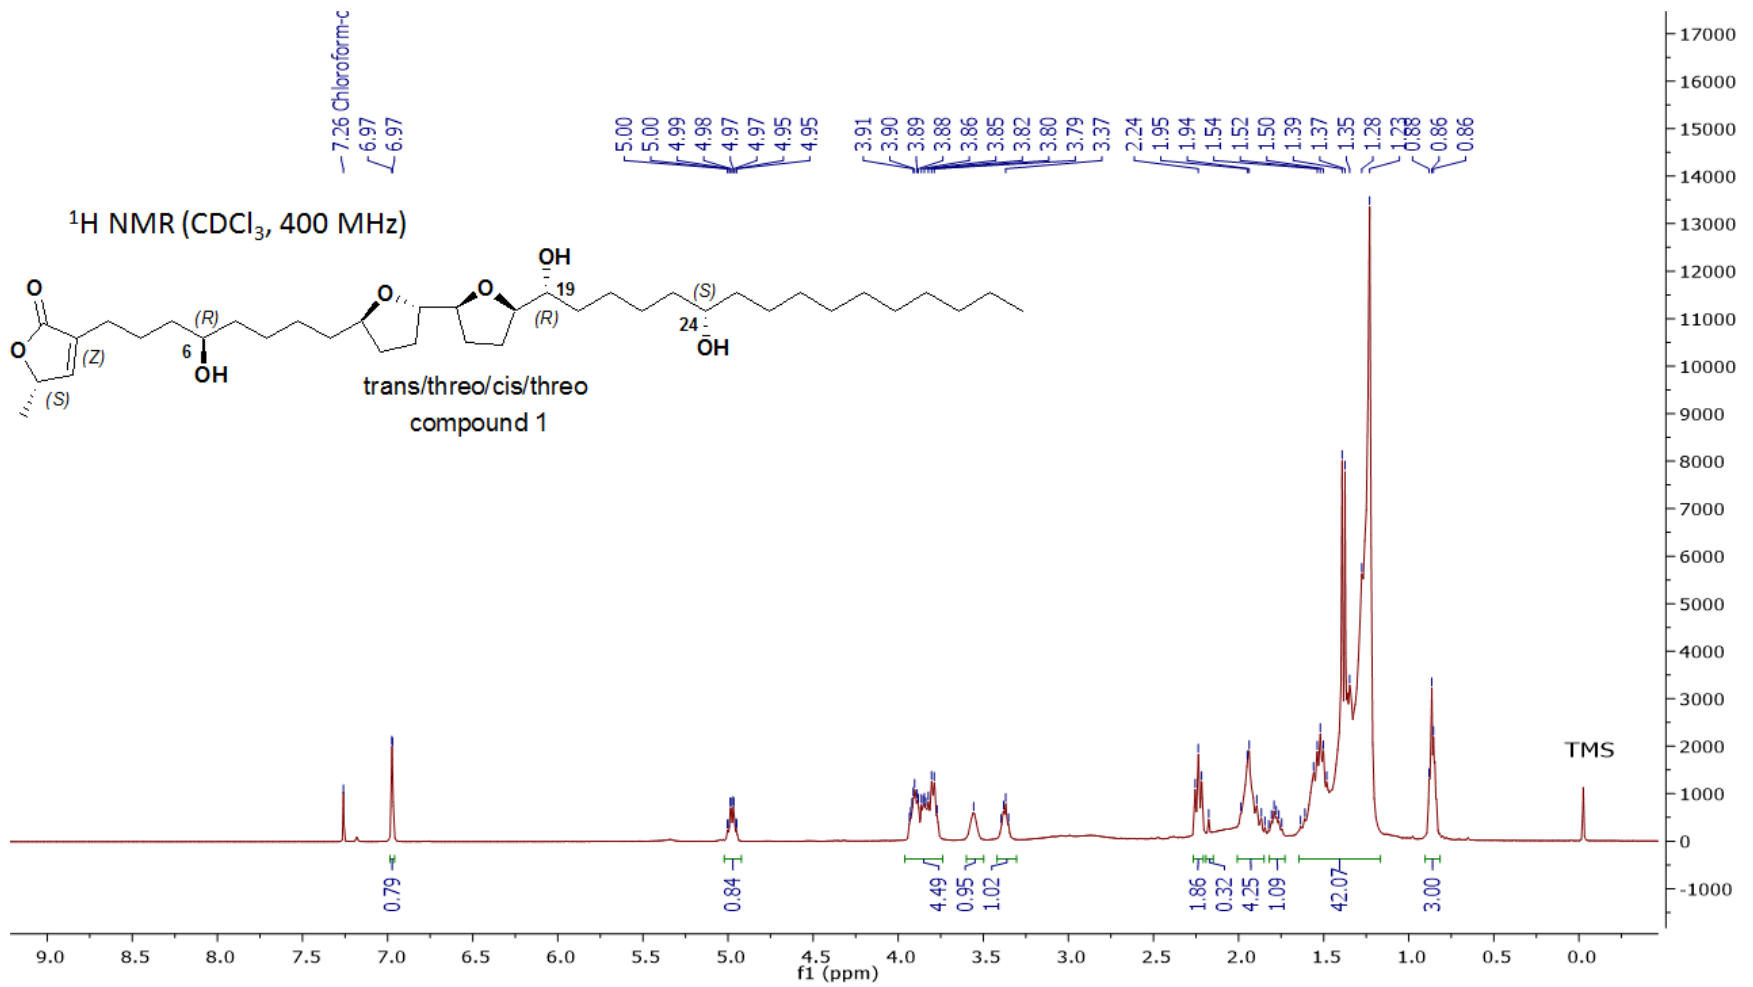

S1 <sup>1</sup>H NMR (400 MHz, CDCl<sub>3</sub>) spectrum of compound 1

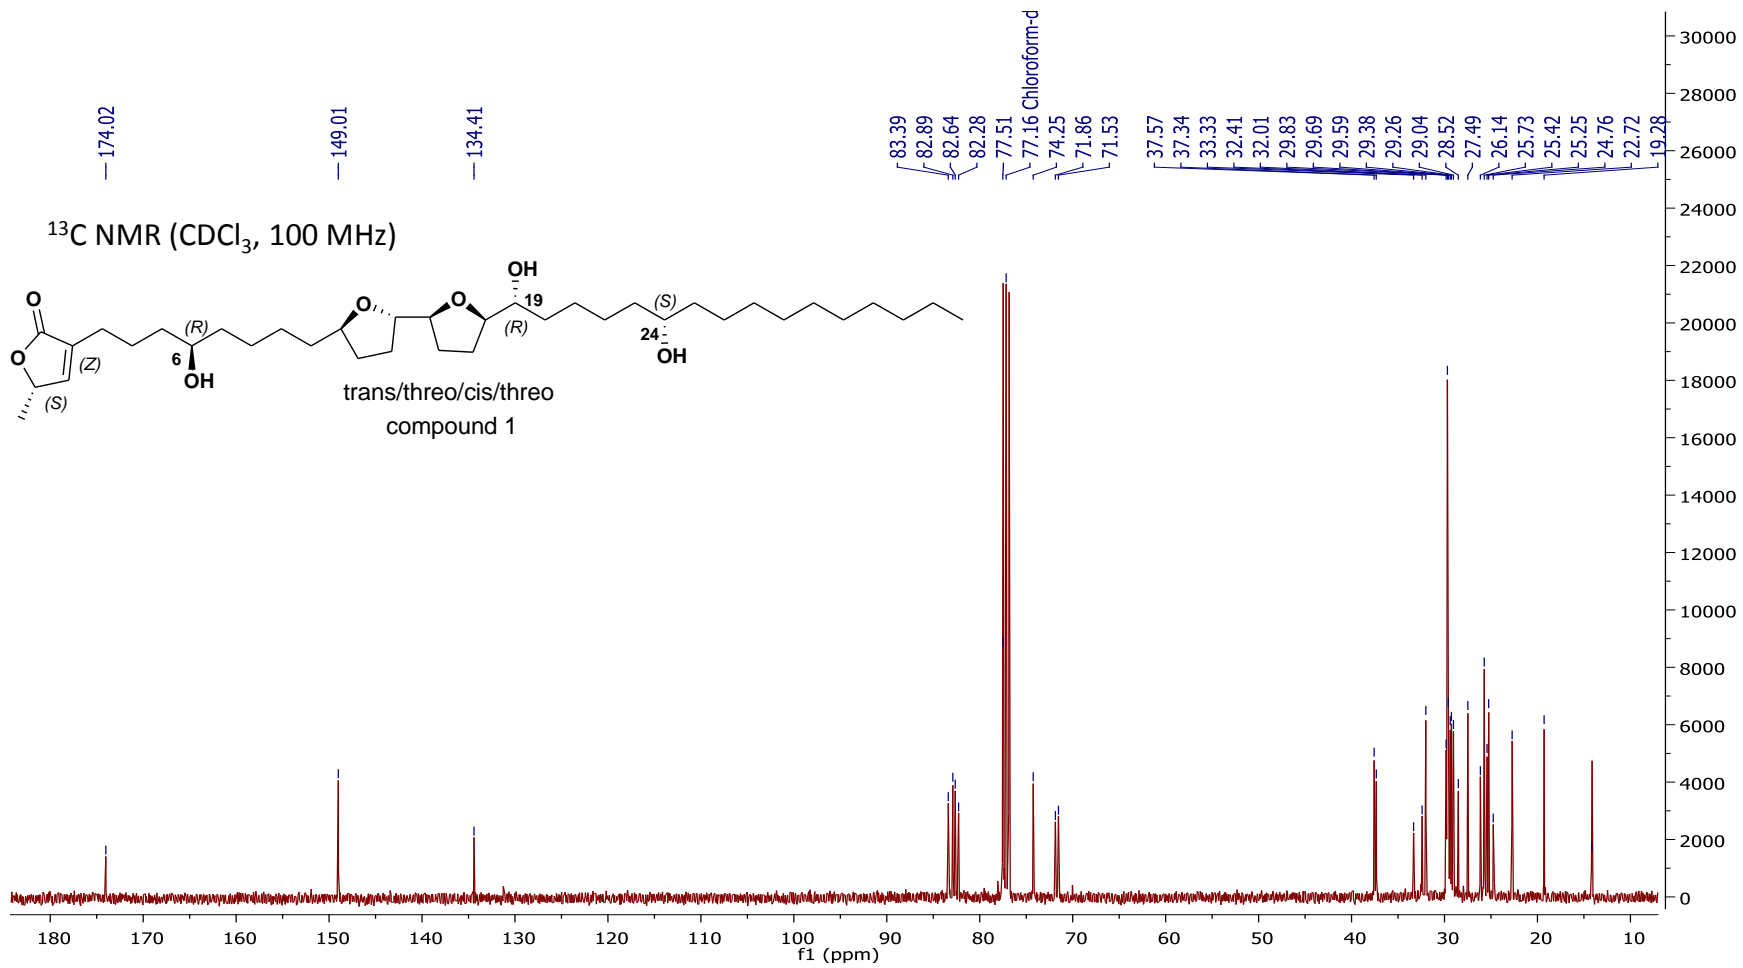

S2. <sup>13</sup>C NMR (100 MHz, CDCl<sub>3</sub>) spectrum of compound 1

COSY experiment (CDCl<sub>3</sub>)

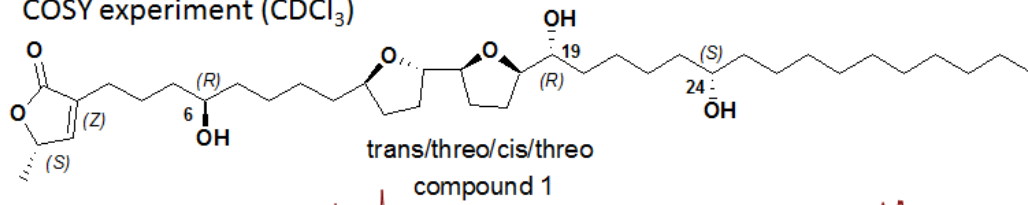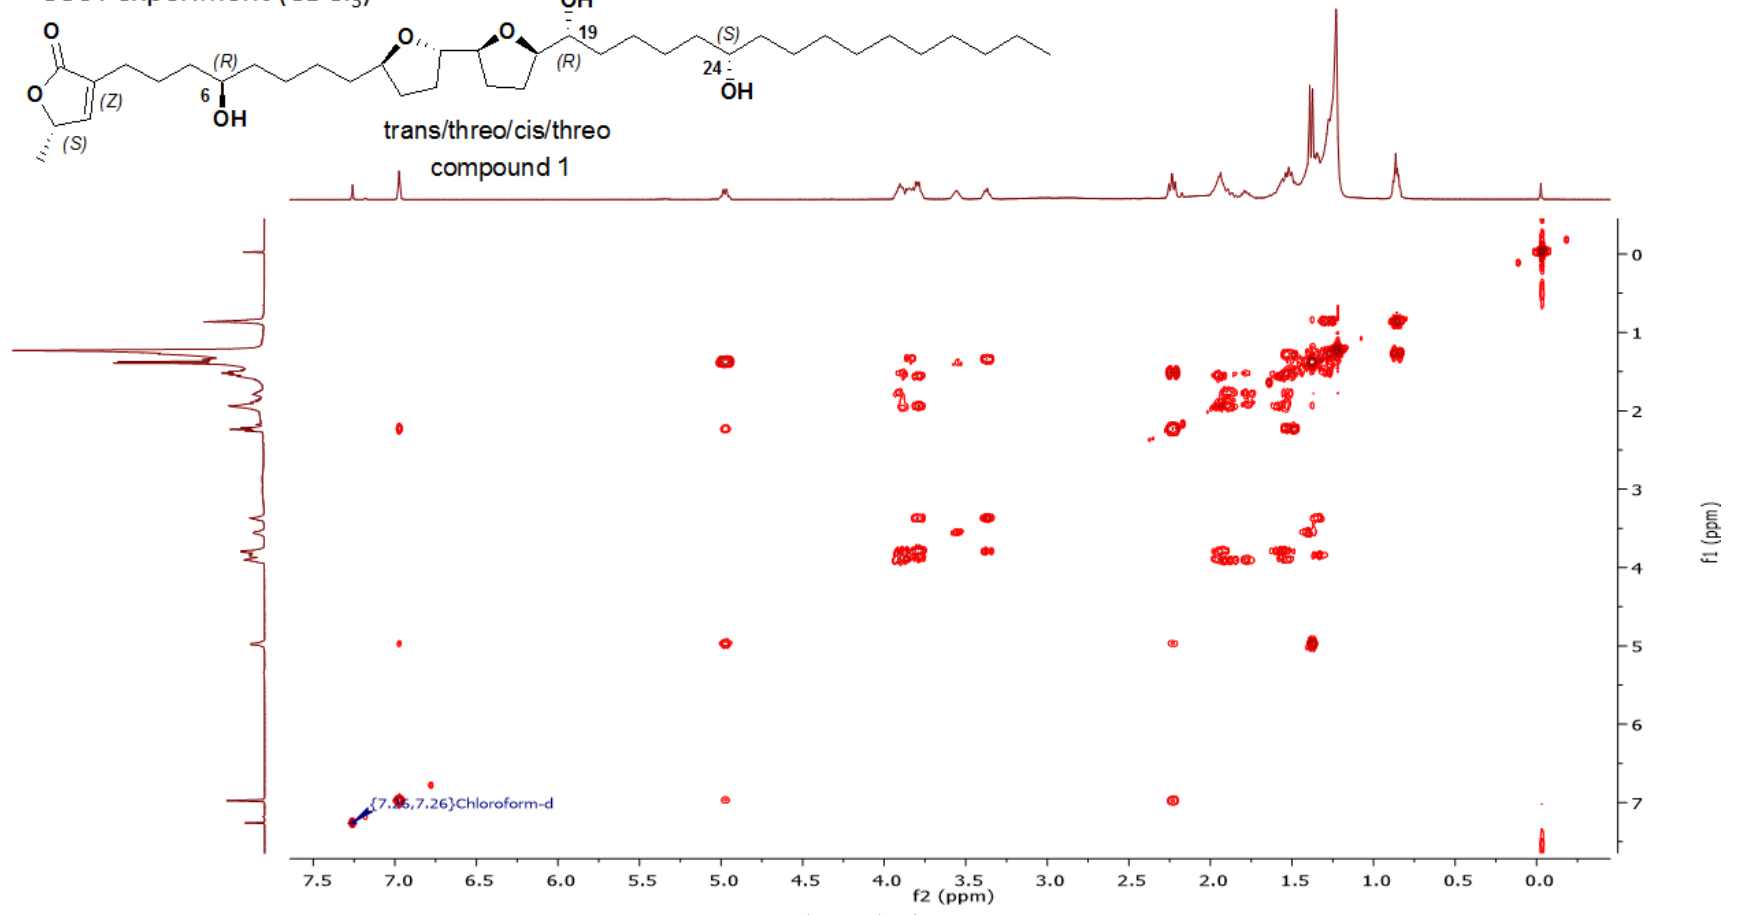

S3 COSY experiment (CDCl<sub>3</sub>) of 1

HSQC experiment (CDCl<sub>3</sub>)

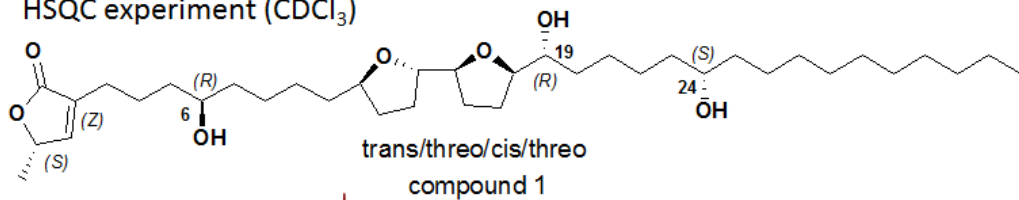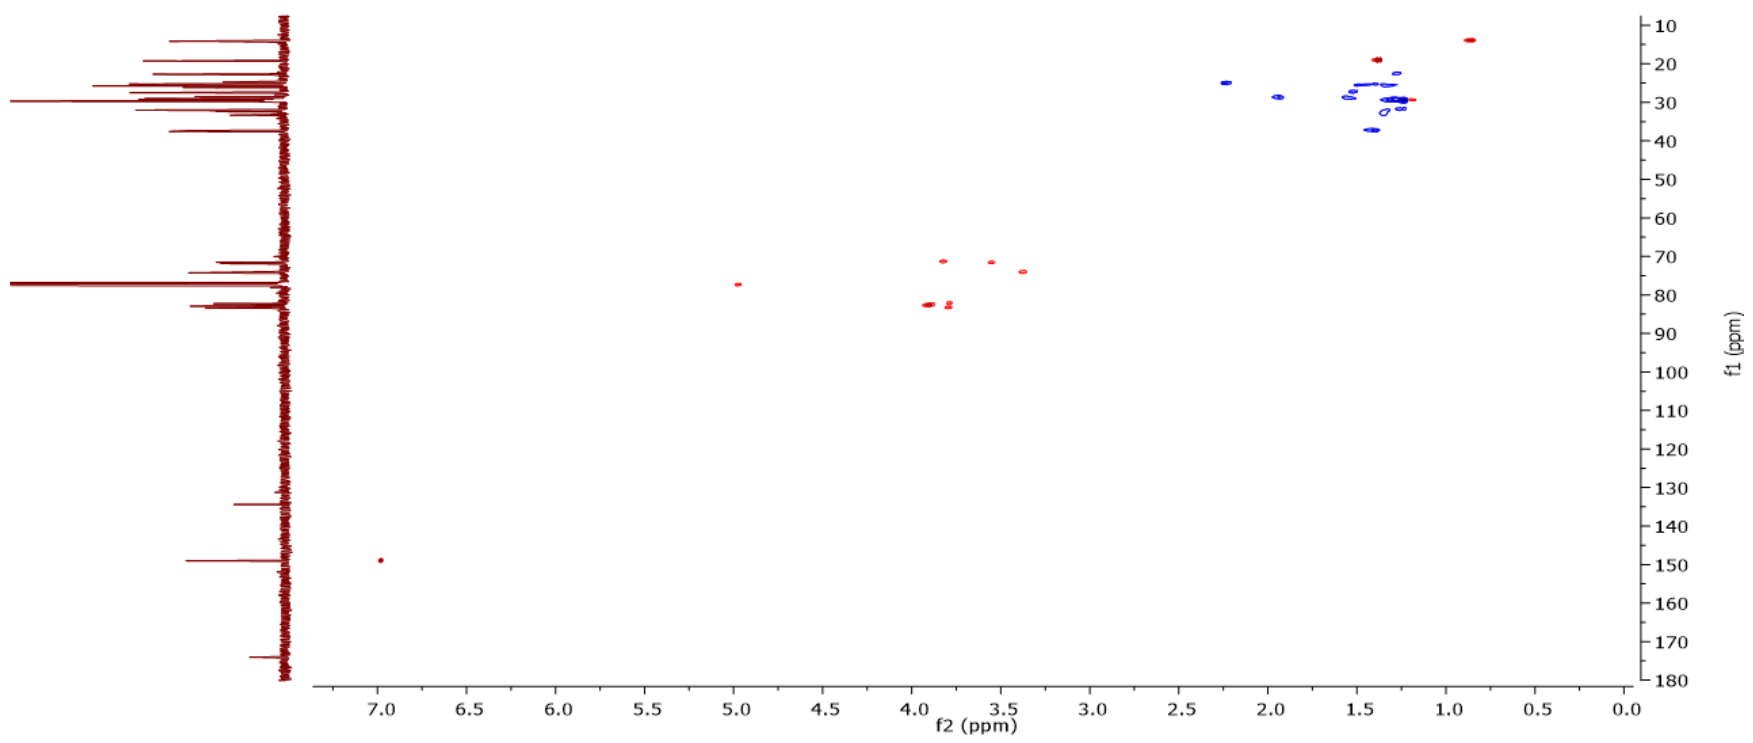

S4 HSQC experiment (CDCl<sub>3</sub>) of 1



HMBC experiment (CDCl<sub>3</sub>)

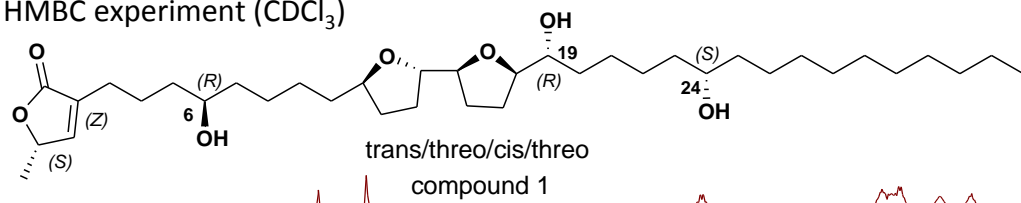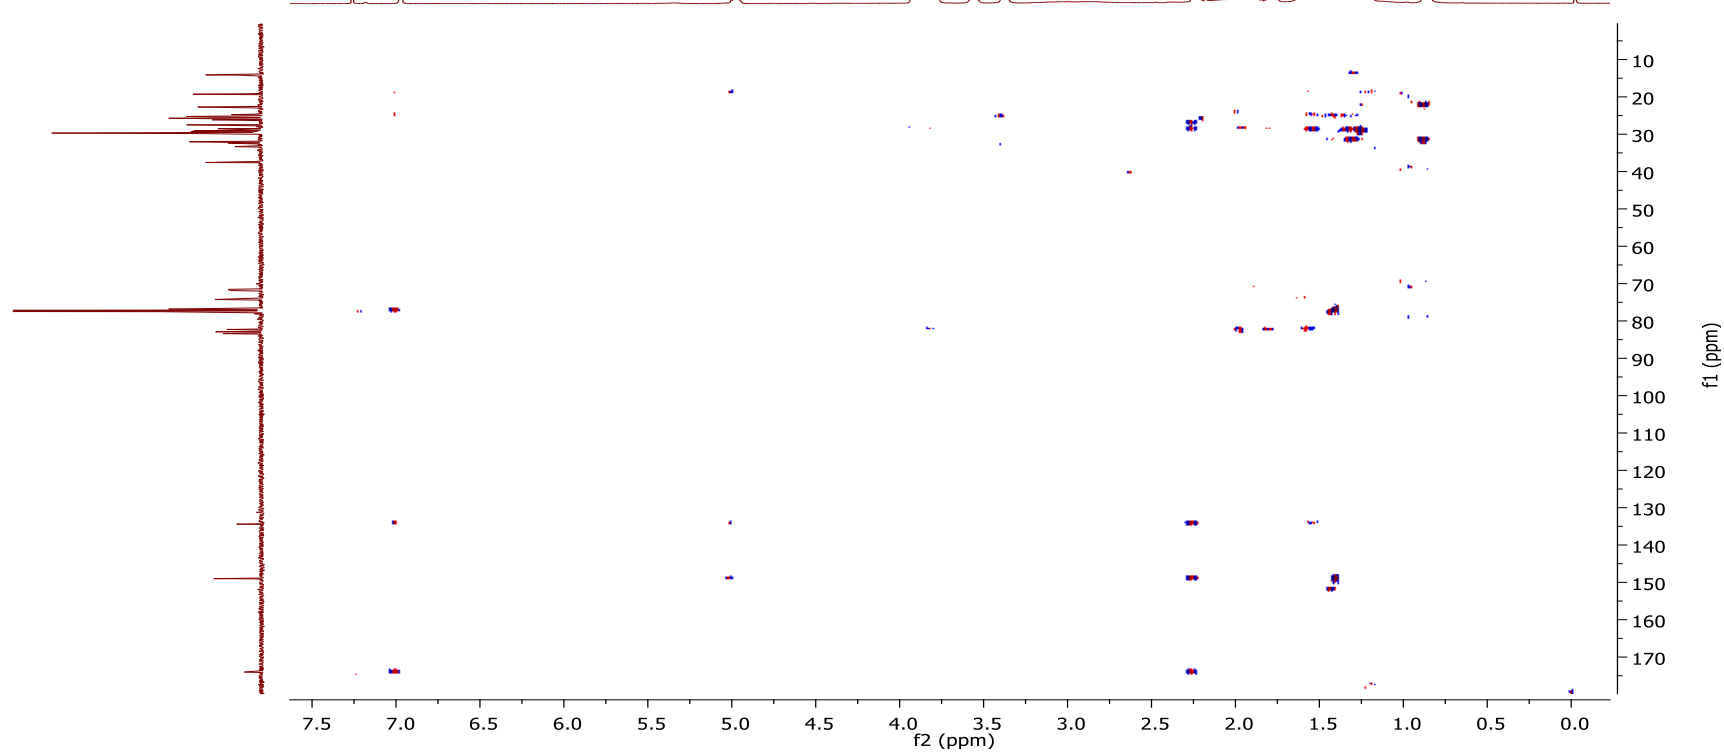

S5 HMBC experiment (CDCl<sub>3</sub>) of 1

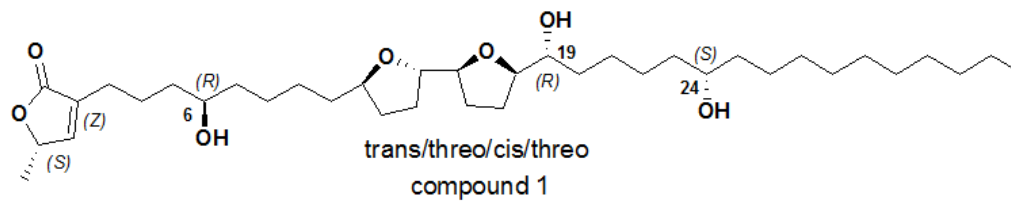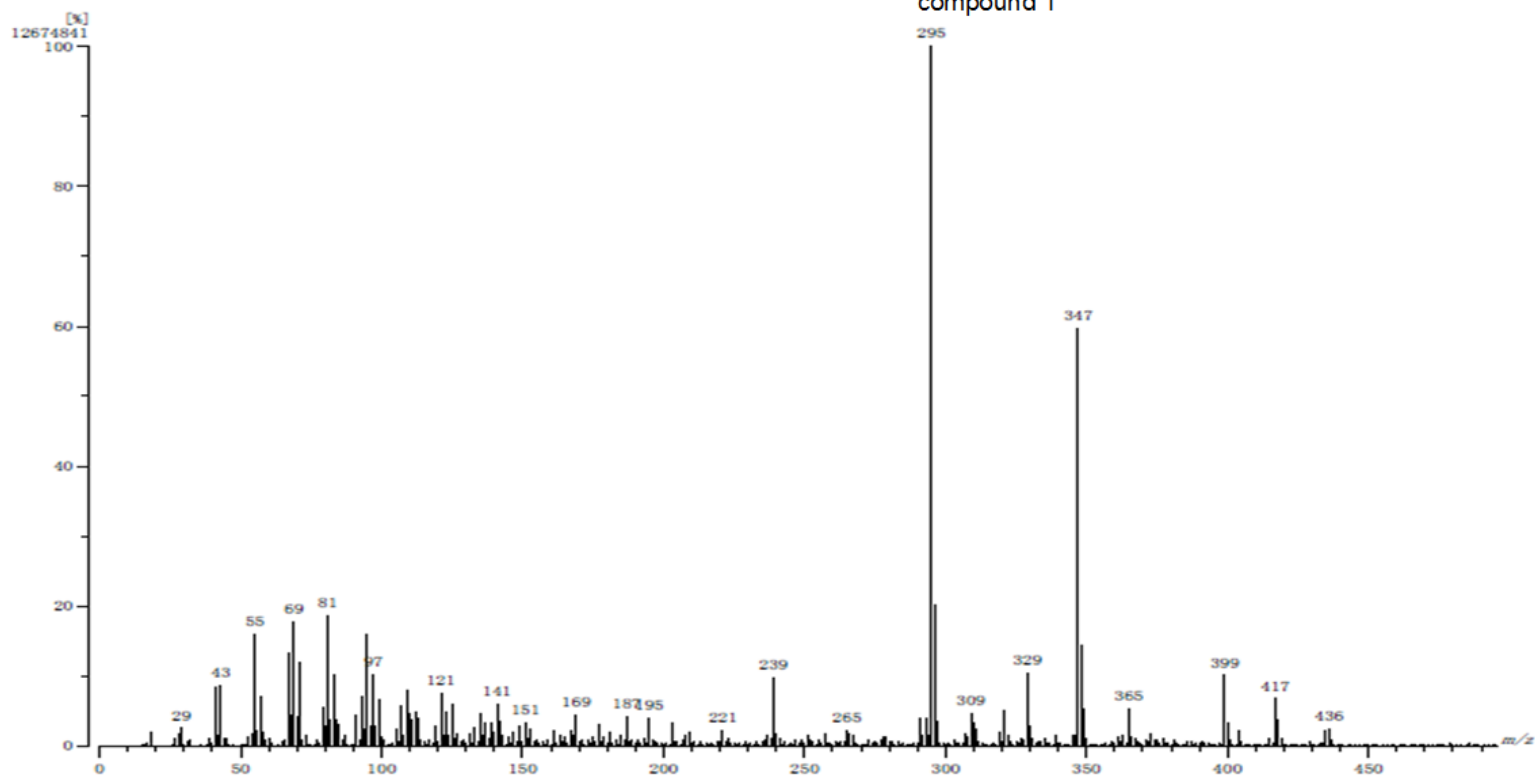

S6 Mass spectrum (IE) of 1

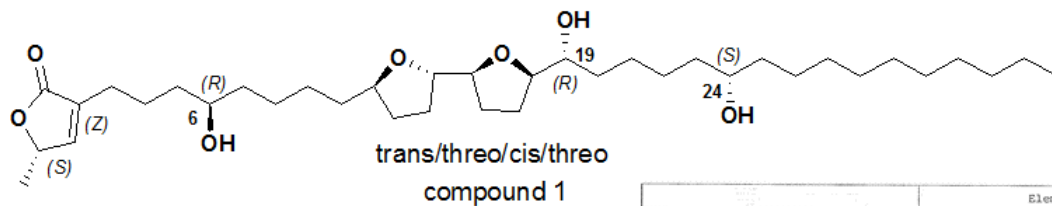

Elemental composition calculator

Target m/z: +645.4695 amu  
 Tolerance: +3.0000 ppm  
 Result type: Elemental  
 Max num of results: 1000  
 Min DBE: -0.5000 Max DBE: +100.0000  
 Electron state: Even  
 Num of charges: 1  
 Add water: N/A  
 Add proton: N/A  
 File Name: J-210618-Ar-1-9-01.wiff

|   | Elements | Min Number | Max Number |
|---|----------|------------|------------|
| 1 | C        | 0          | 50         |
| 2 | H        | 0          | 70         |
| 3 | N        | 0          | 2          |
| 4 | O        | 0          | 10         |
| 5 | Na       | 0          | 2          |

|   | Formula       | Calculated m/z (amu) | mDa Error | PPM Error | DBE |
|---|---------------|----------------------|-----------|-----------|-----|
| 1 | C37 H66 O7 Na | 645.470076           | -0.584240 | -0.905138 | 4.5 |

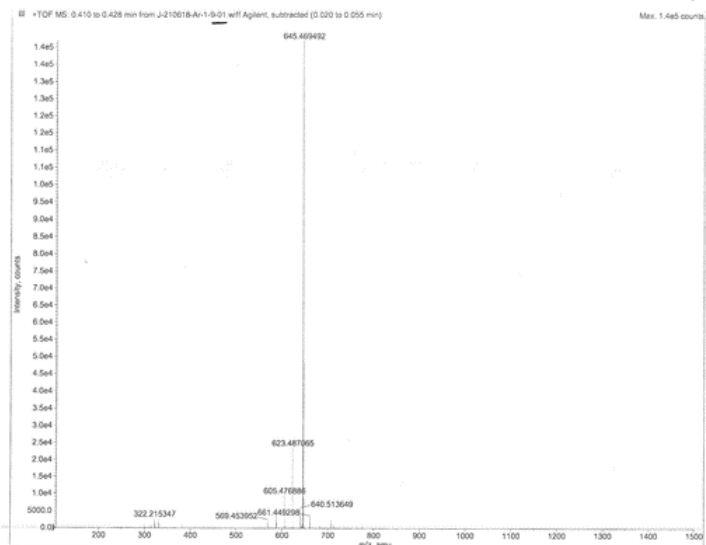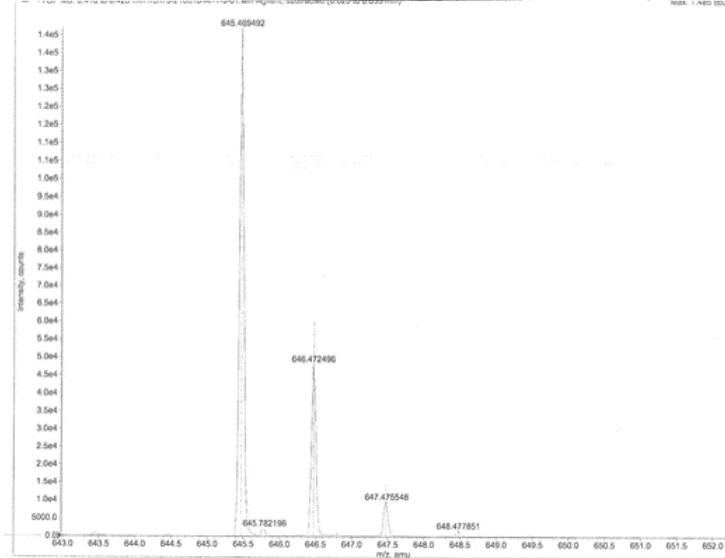

S7 HRMS (ESI-TOF) of compound 1

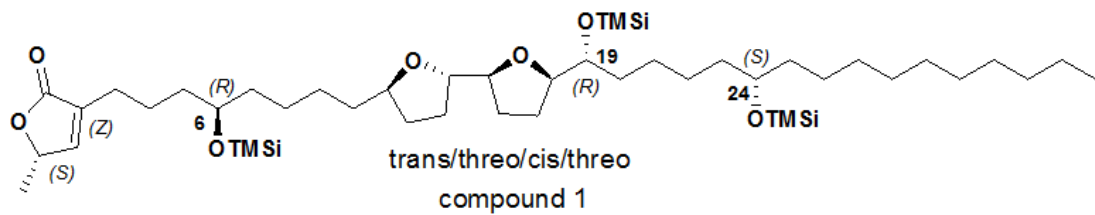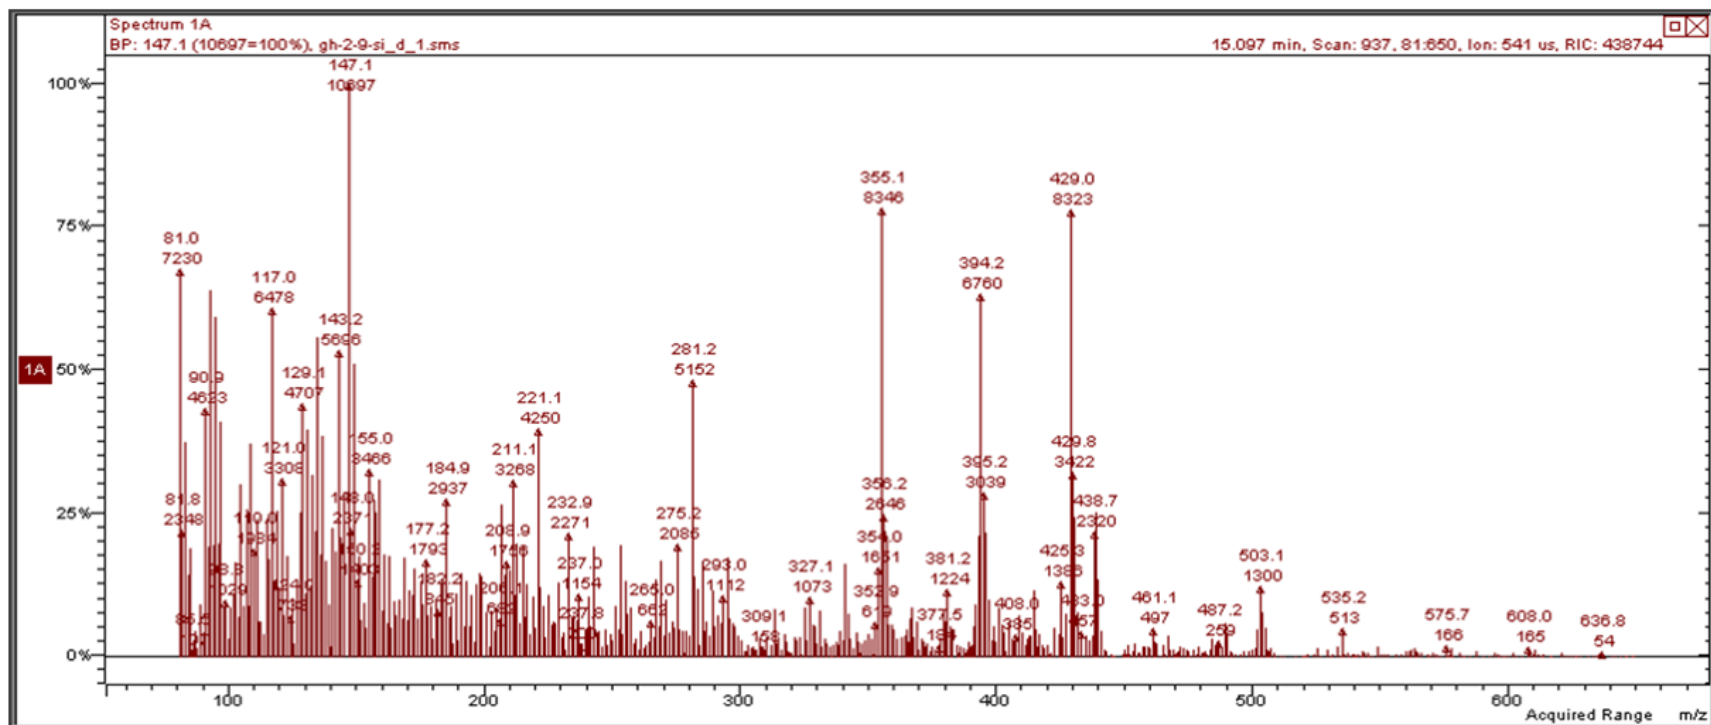

S8 Mass spectrum of the TMSi derivative of 1

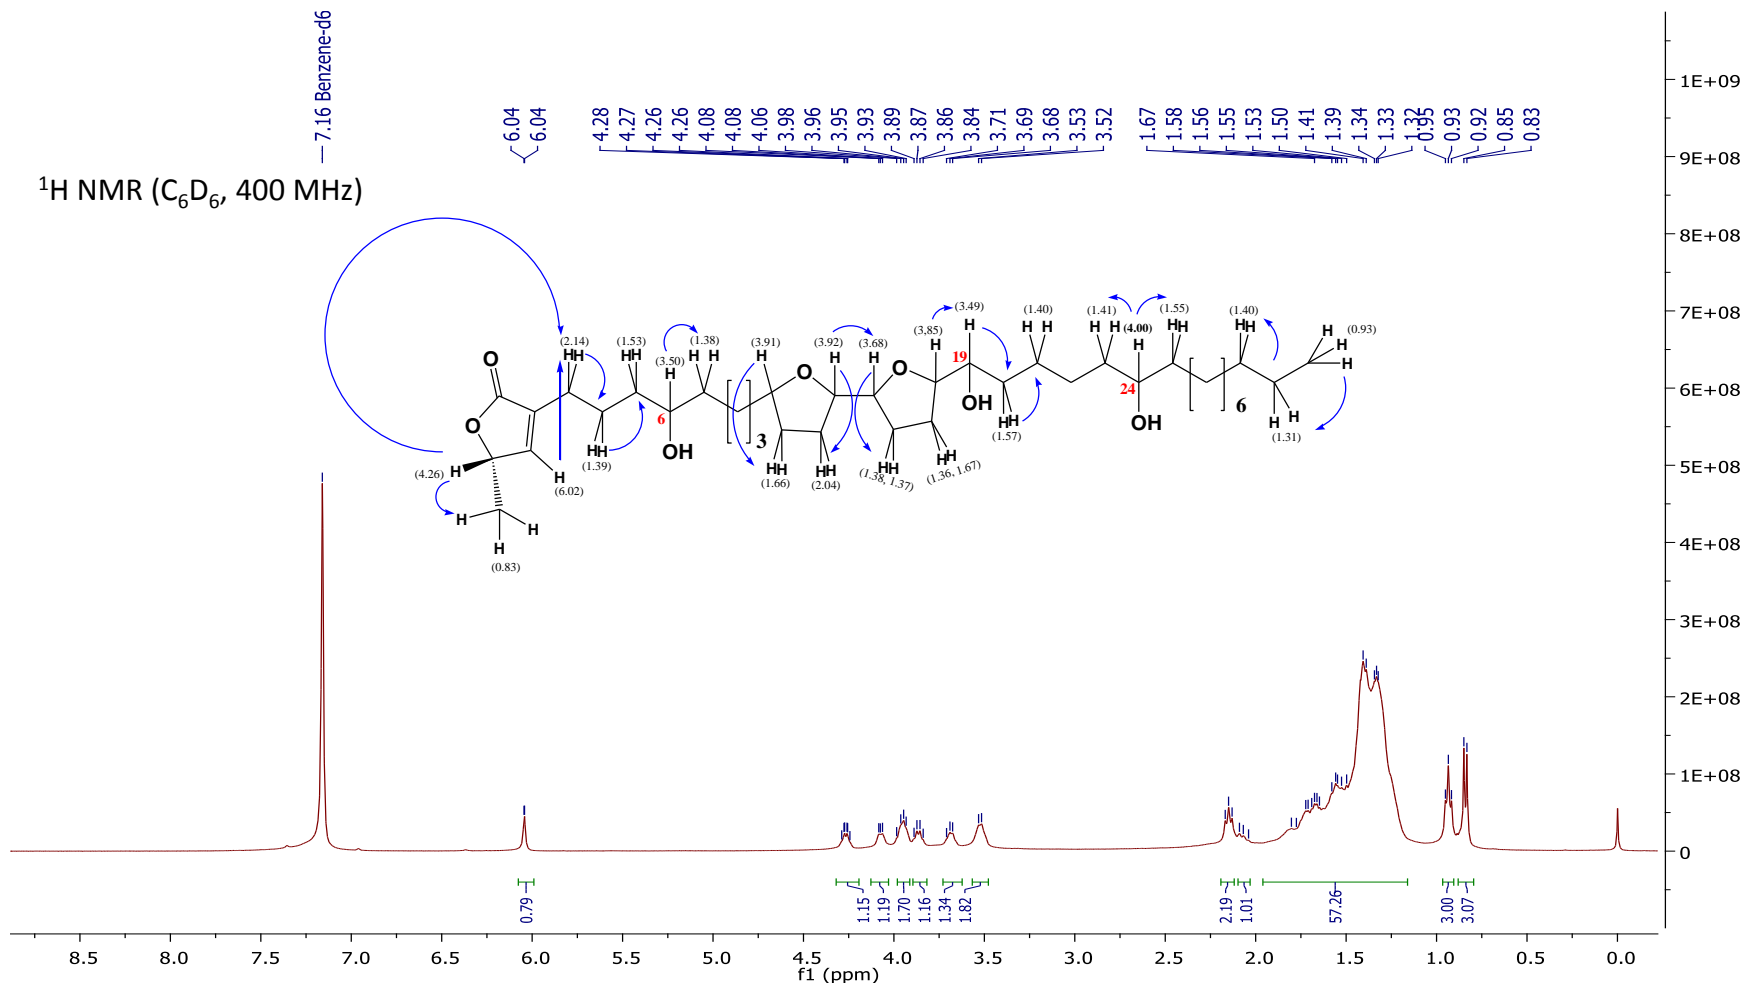

S9 Correlations in COSY and <sup>1</sup>H NMR spectrum (C<sub>6</sub>D<sub>6</sub>) of 1

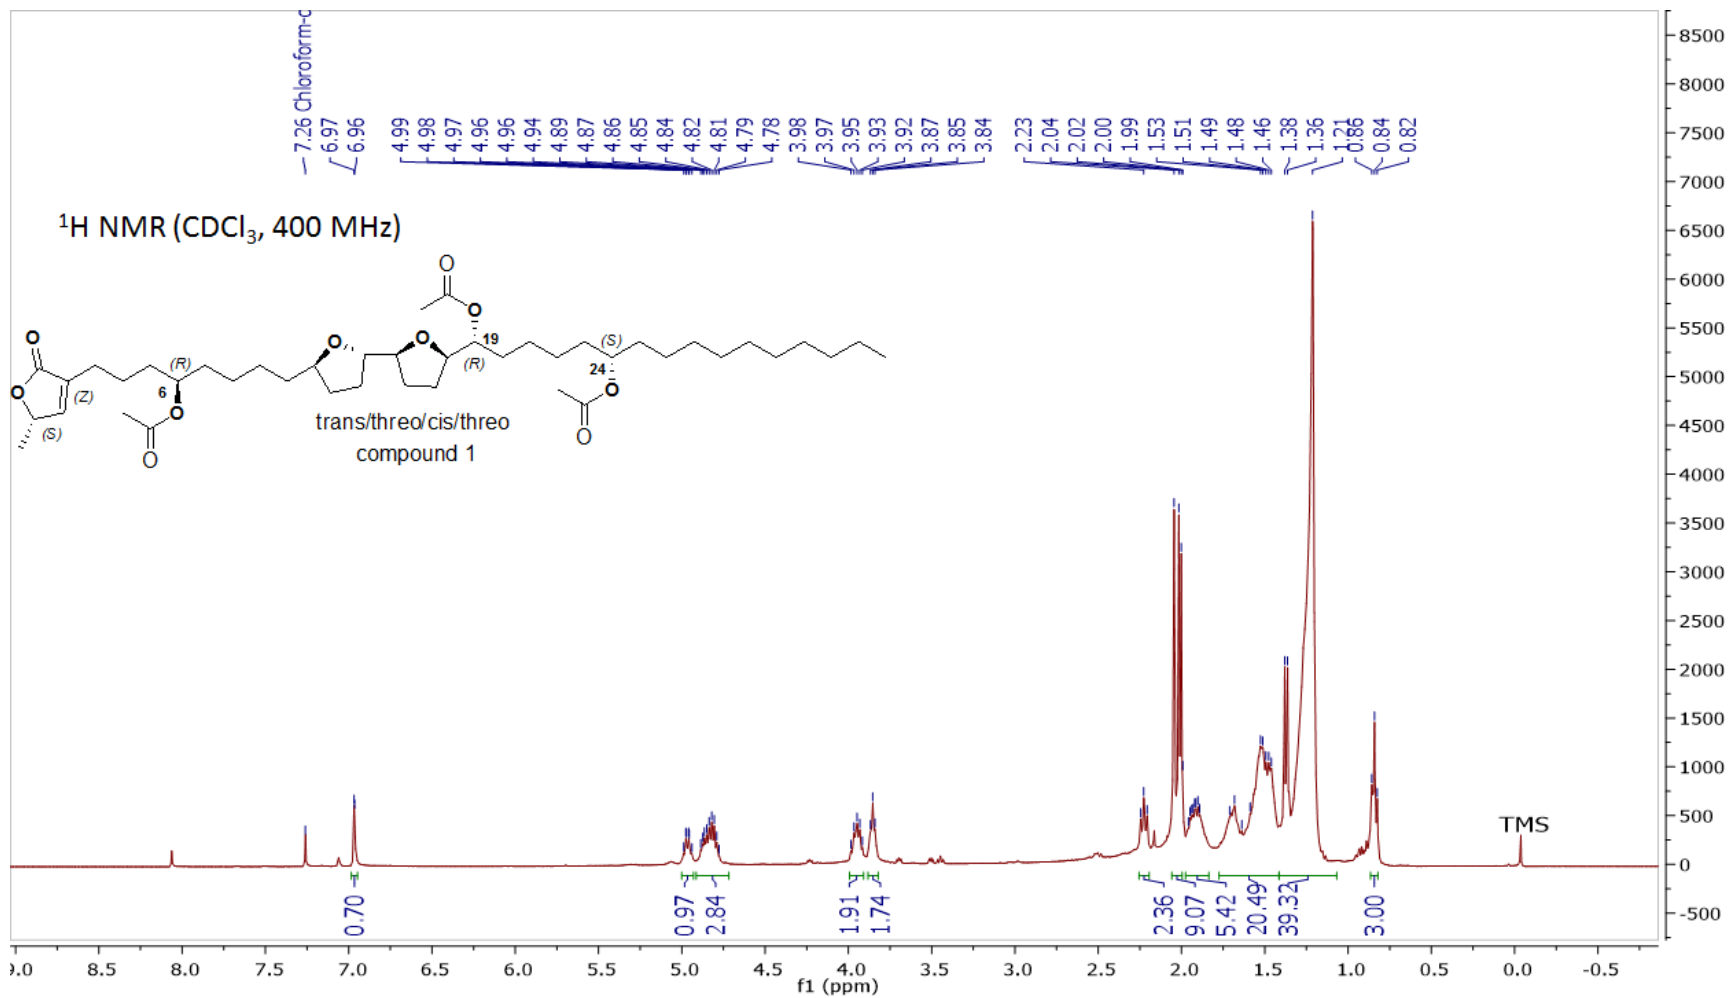

S10 <sup>1</sup>H NMR (400 MHz, CDCl<sub>3</sub>) spectrum of compound 1a

COSY experiment, Mosher ester *R* (CDCl<sub>3</sub>)

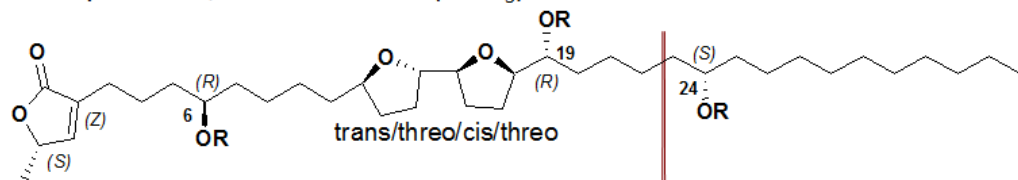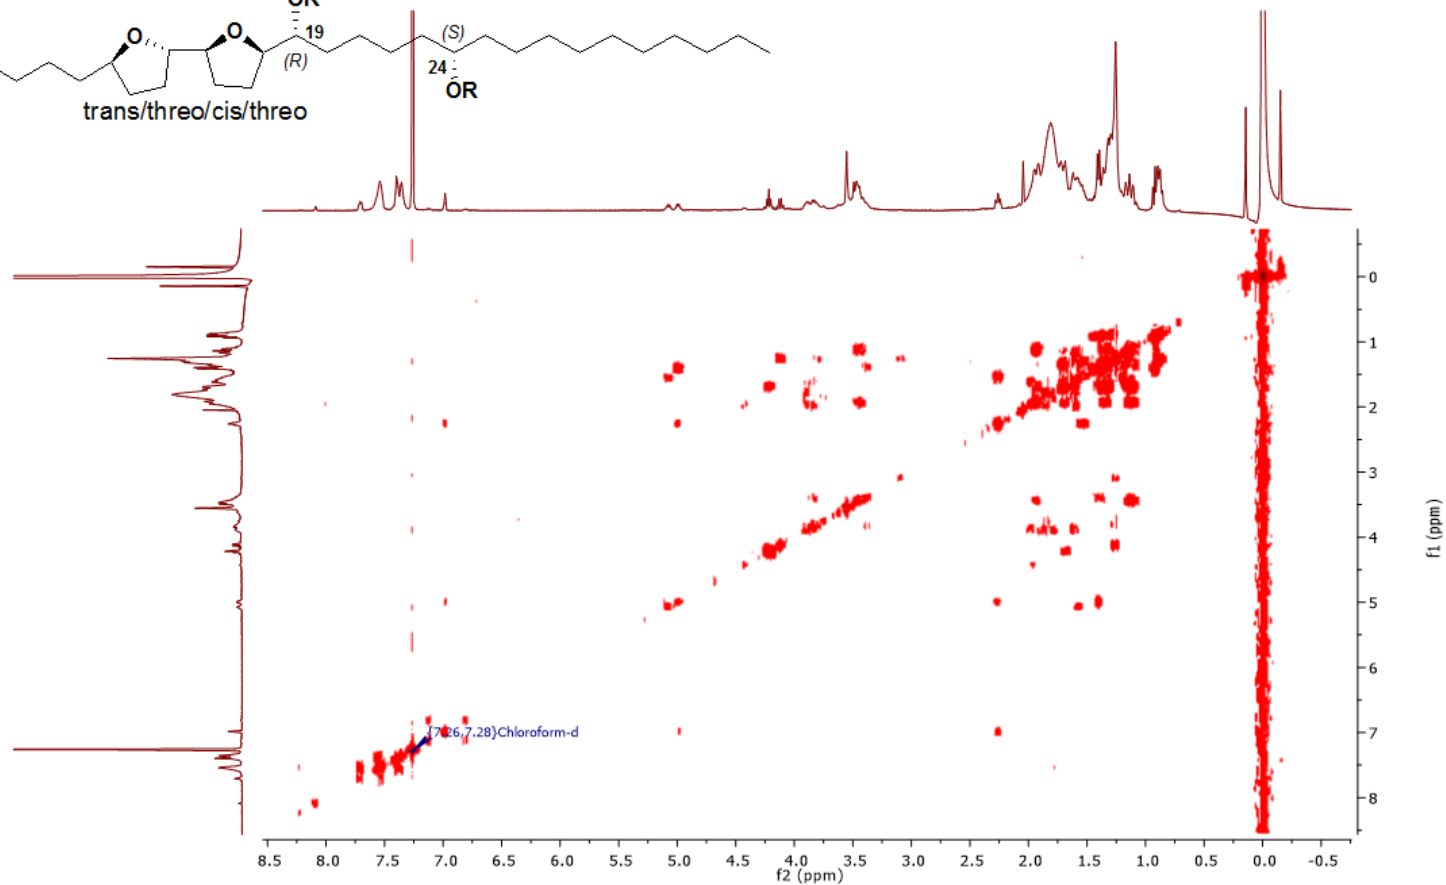

S11 COSY experiment (CDCl<sub>3</sub>), Mosher ester of 1, R= (*R*)-MTPA

COSY experiment, Mosher ester *S* (CDCl<sub>3</sub>)

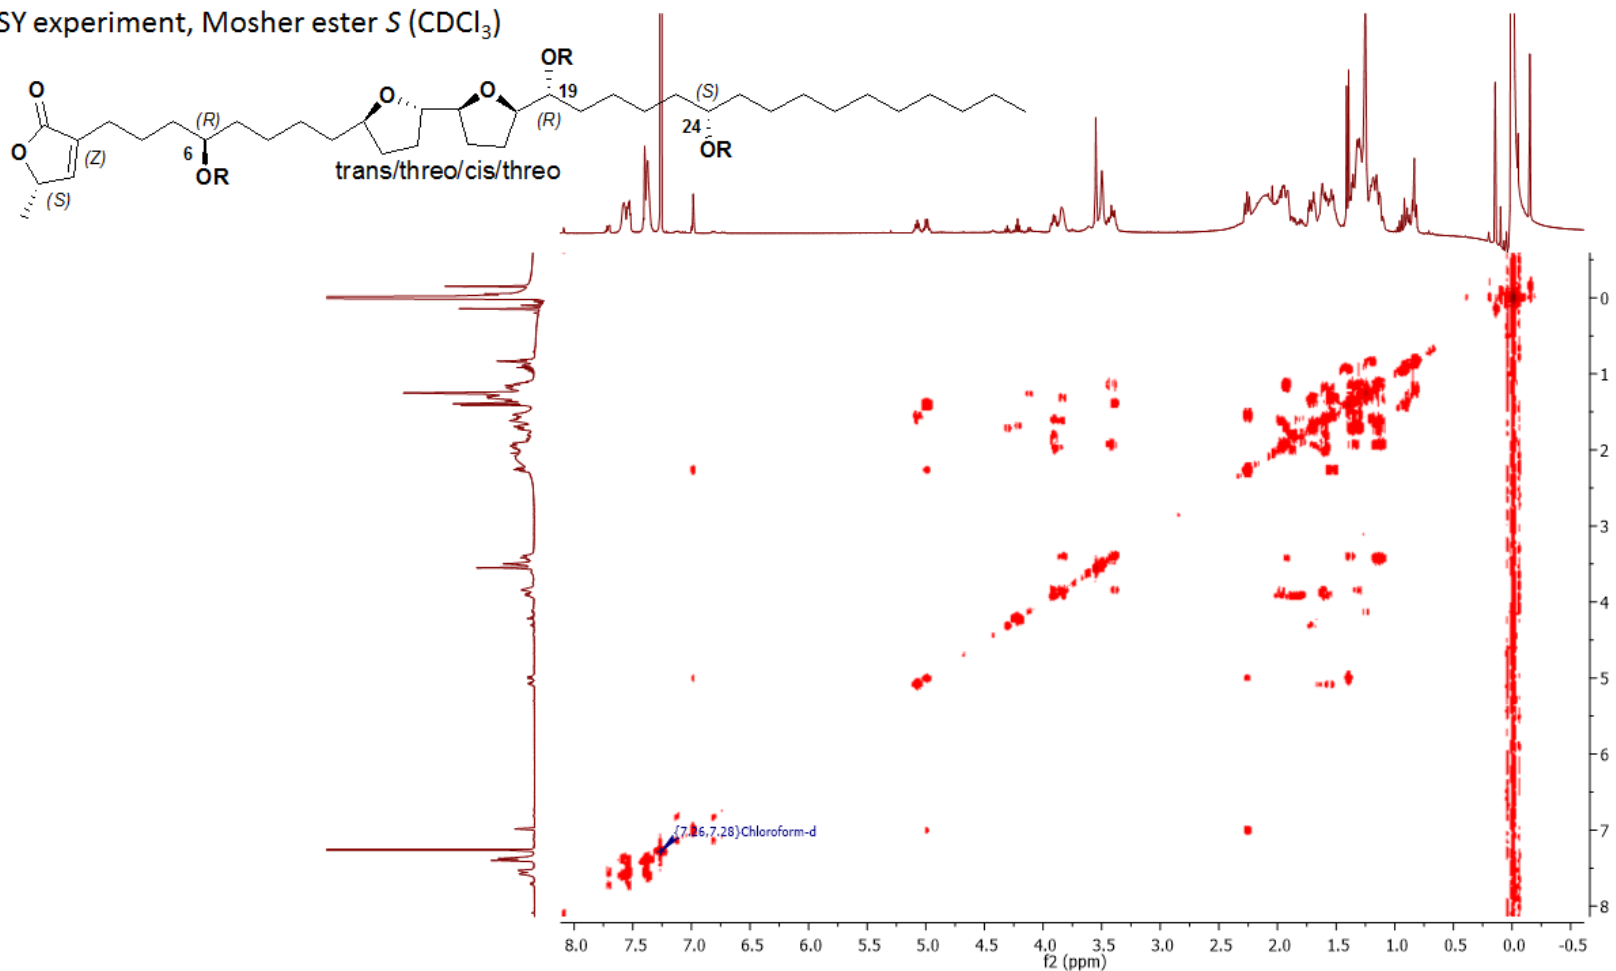

S12 COSY experiment (CDCl<sub>3</sub>), Mosher ester of 1, R=(*S*)-MTPA



| Annopurpuricin A |                                |                                 |
|------------------|--------------------------------|---------------------------------|
| Experimental     | 6-311G(d,p)/B3LYP <sup>a</sup> | 6-311G(d,p)/ωB97XD <sup>b</sup> |
| 3373.49          | 3651.98                        | 3717.85                         |
| 2916.36          | 2941.67                        | 2917.35                         |
| 2848.85          | 2863.30                        | 2846.24                         |
| 1742.68          | 1767.26                        | 1805.48                         |
| 1651.06          | 1641.57                        | 1678.02                         |
| 1471.68          | 1458.90                        | 1469.24                         |
| 1420.56          | 1423.38                        | 1422.21                         |
| 1371.38          | 1374.44                        | 1373.00                         |
| 1324.12          | 1324.52                        | 1324.57                         |
| 1203.57          | 1207.92                        | 1203.50                         |
| 1119.67          | 1120.29                        | 1122.52                         |
| 1080.13          | 1086.63                        | 1082.00                         |
| 1052.16          | 1050.23                        | 1053.94                         |
| 966.33           | 965.71                         | 964.90                          |
| 945.11           | 945.90                         | 943.18                          |
| 868.92           | 869.15                         | 870.93                          |
| 828.42           | 822.49                         | 826.97                          |
| 716.55           | 715.31                         | 716.28                          |
| 637.47           | 632.16                         | 638.27                          |
| 600.82           | 614.55                         | 601.34                          |

<sup>a</sup> Scaling factor of 0.9614

<sup>b</sup> Scaling factor of 0.957

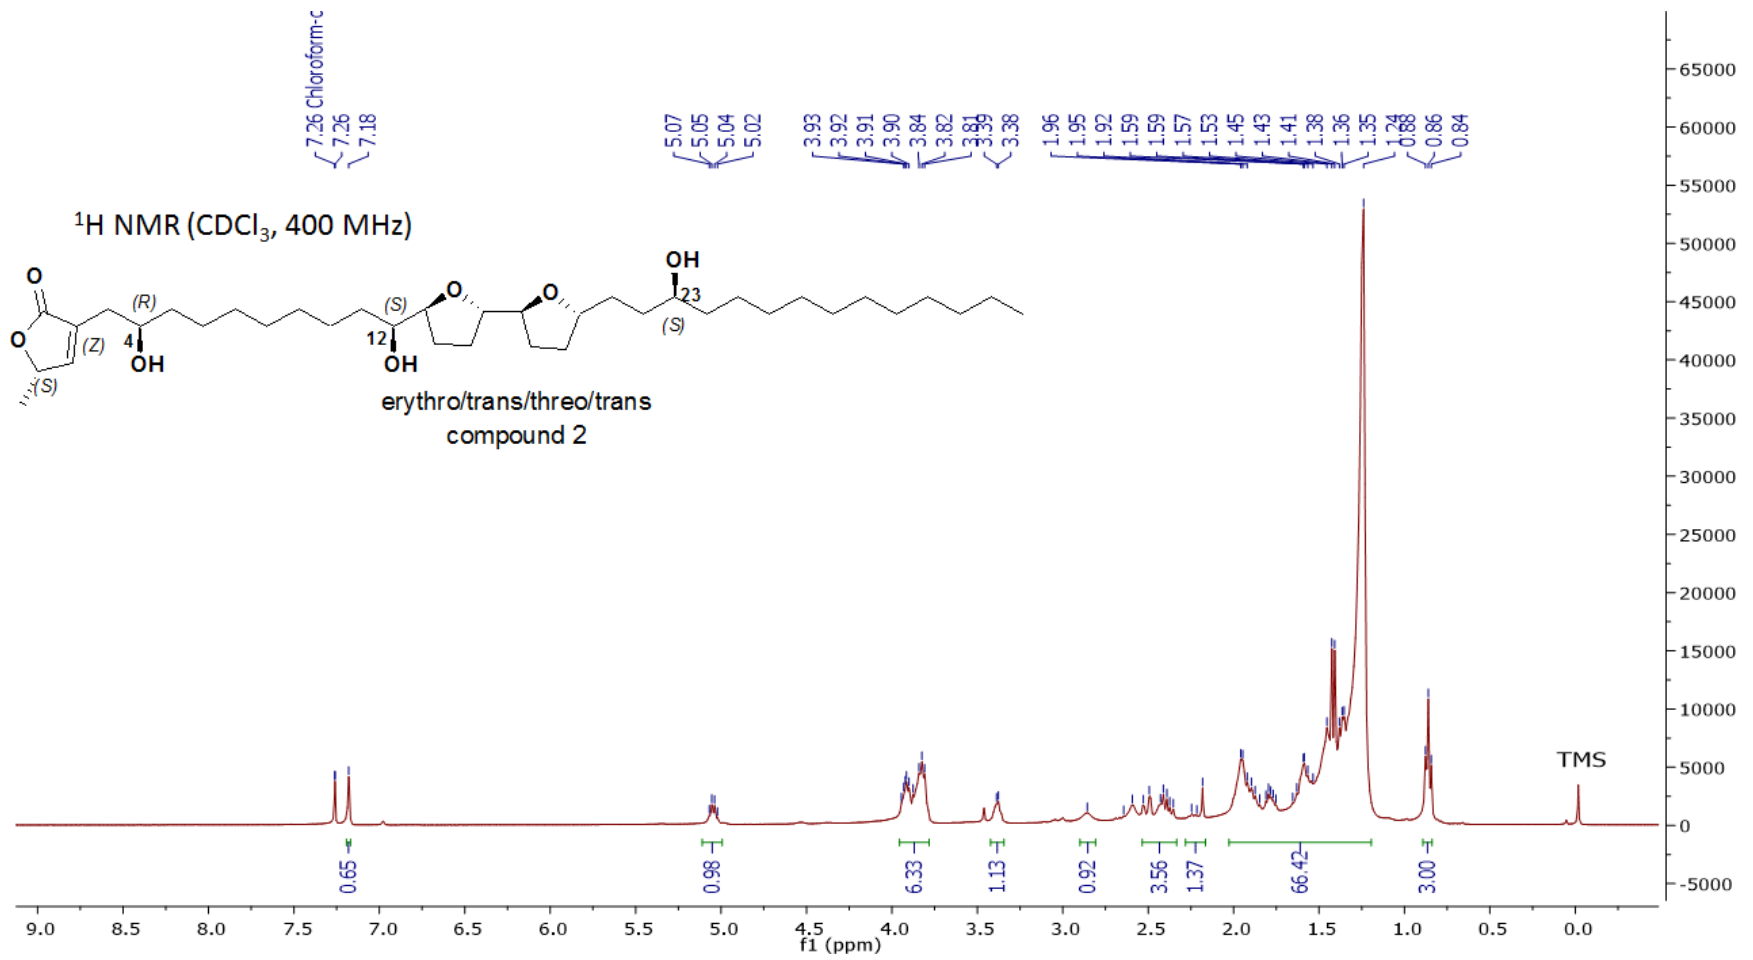

S14 <sup>1</sup>H NMR (400 MHz, CDCl<sub>3</sub>) spectrum of compound 2

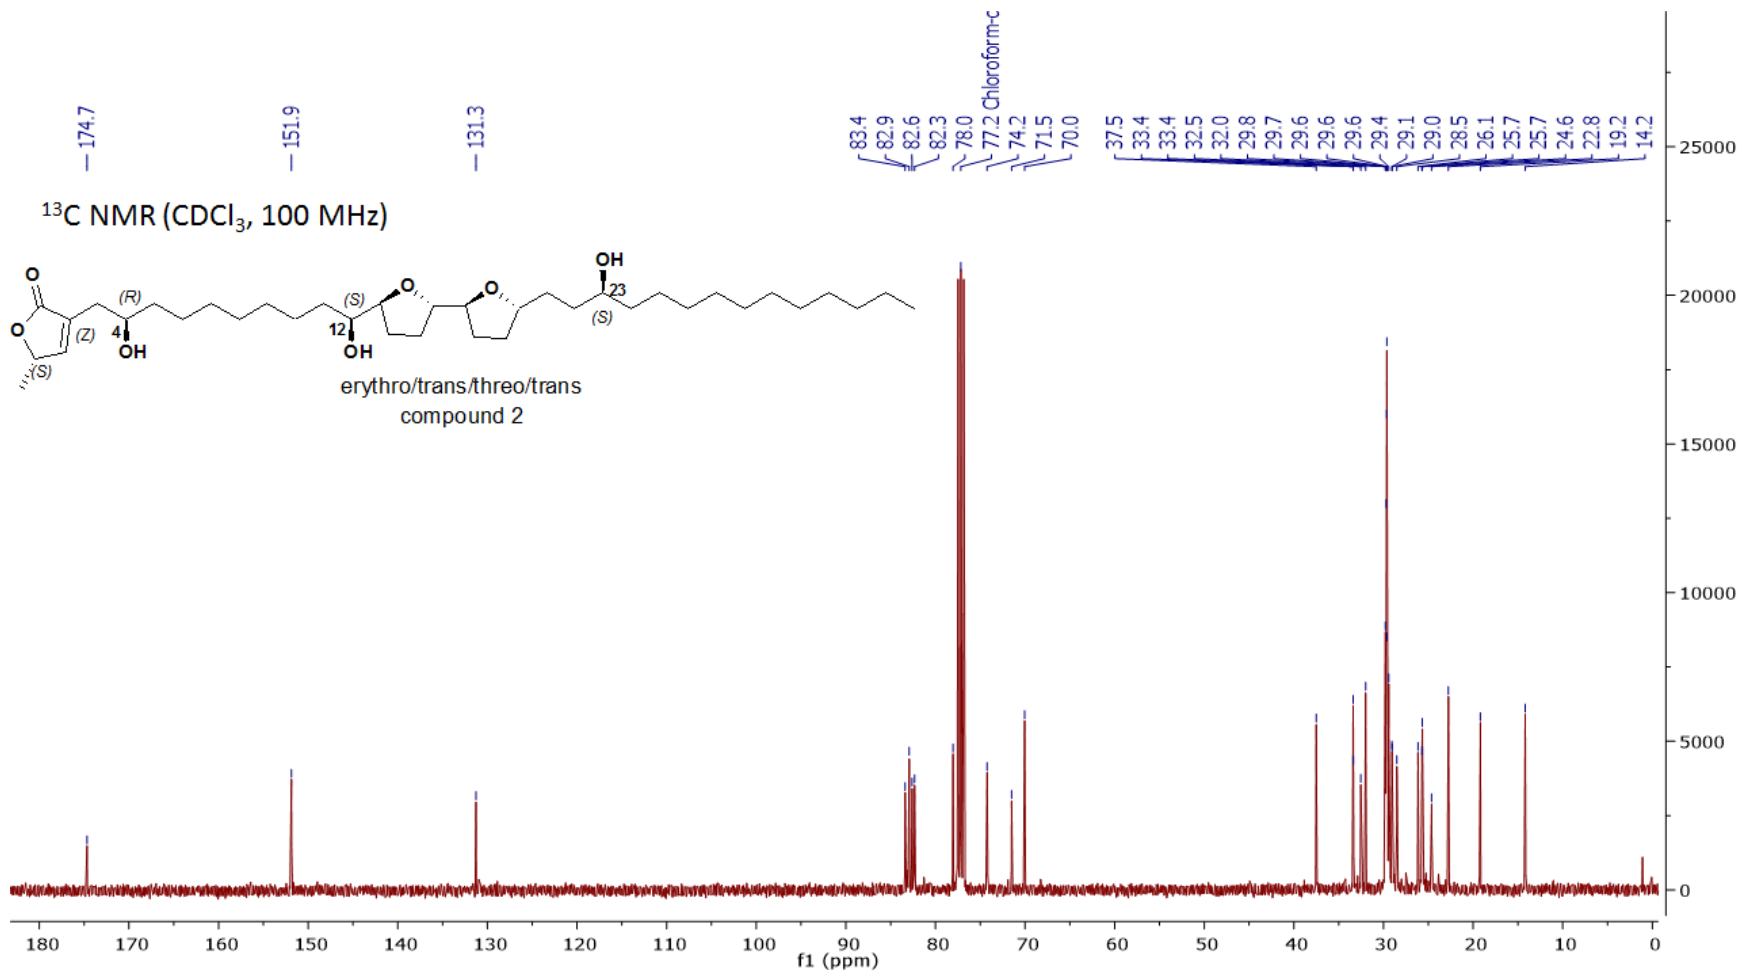

S15 <sup>13</sup>C NMR (100 MHz, CDCl<sub>3</sub>) spectrum of compound 2

COSY experiment (CDCl<sub>3</sub>)

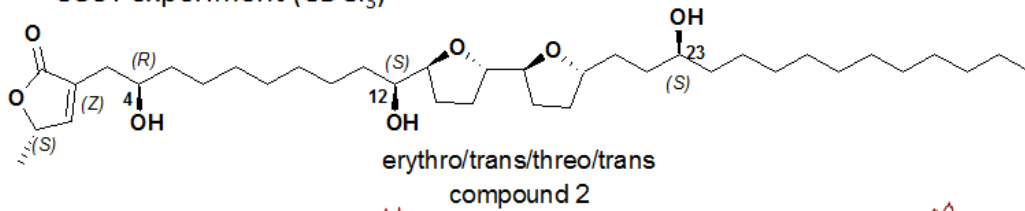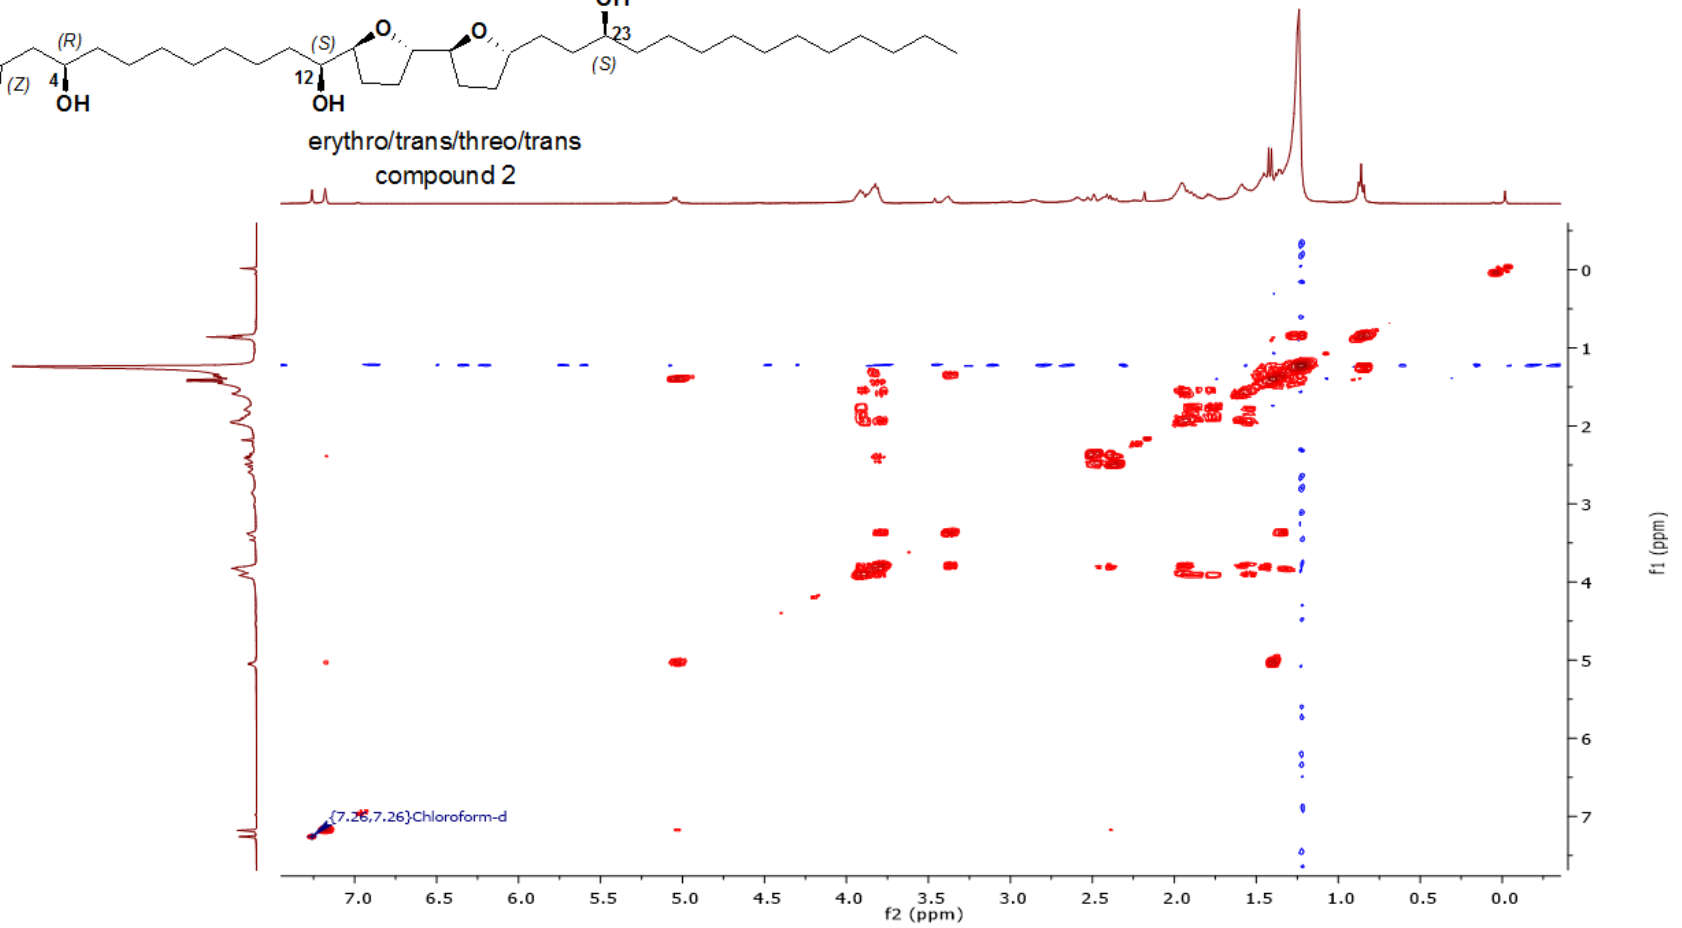

S16 COSY experiment (CDCl<sub>3</sub>) of 2

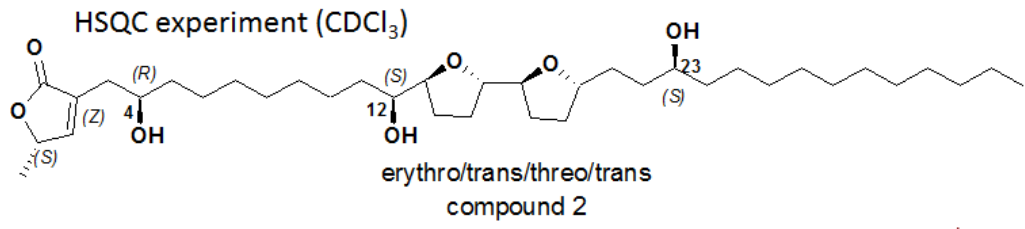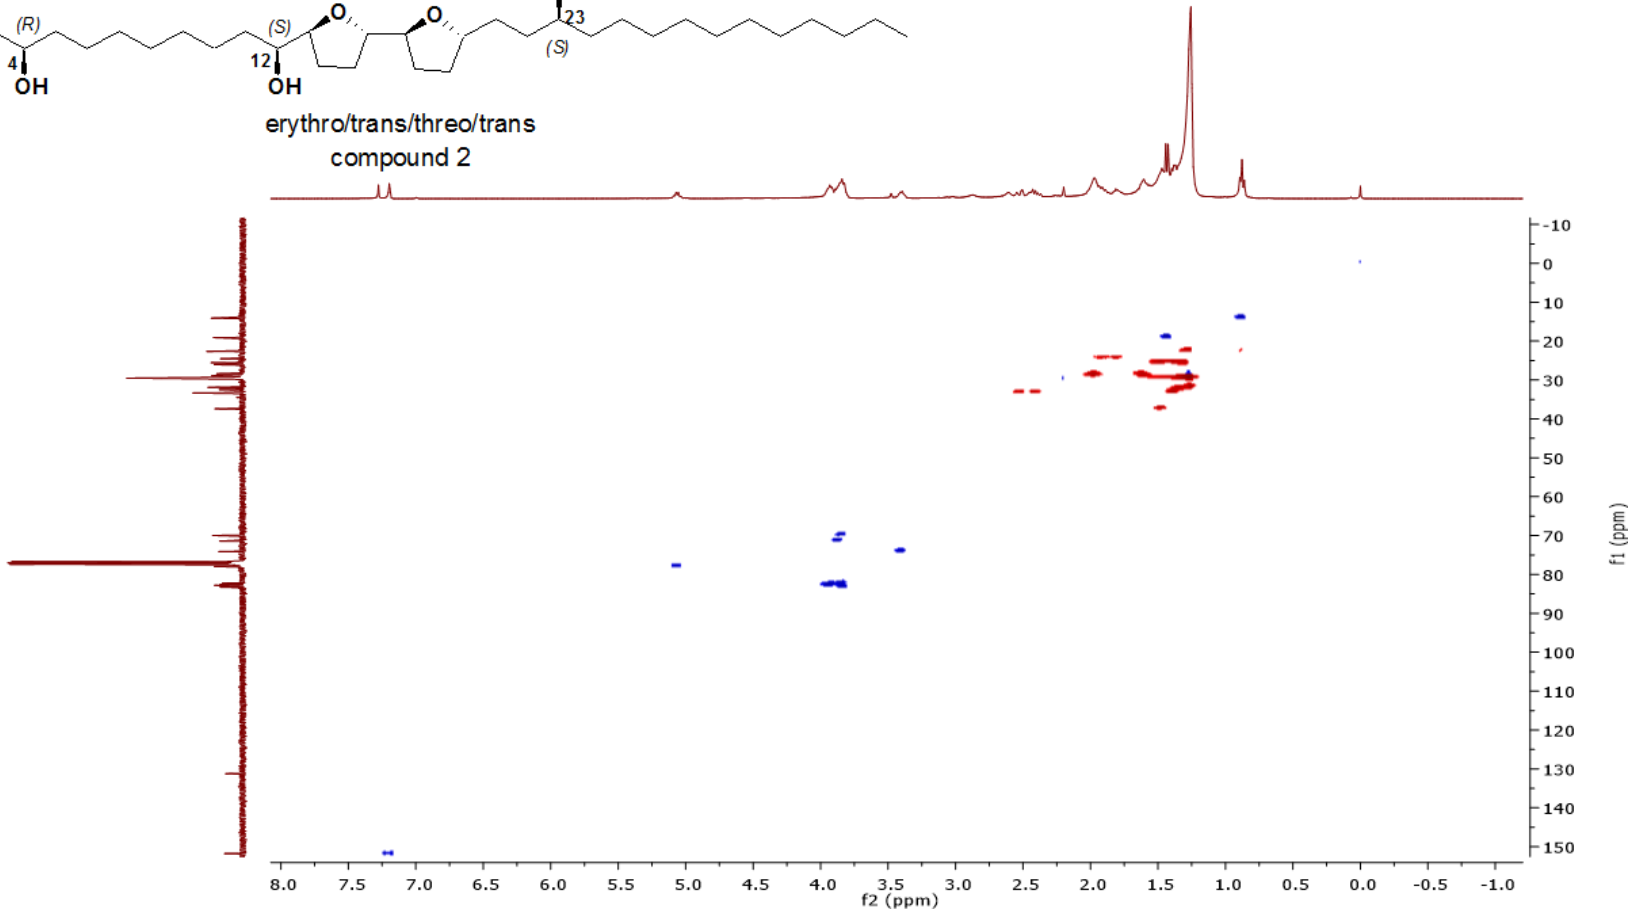

S17 HSQC experiment (CDCl<sub>3</sub>) of 2

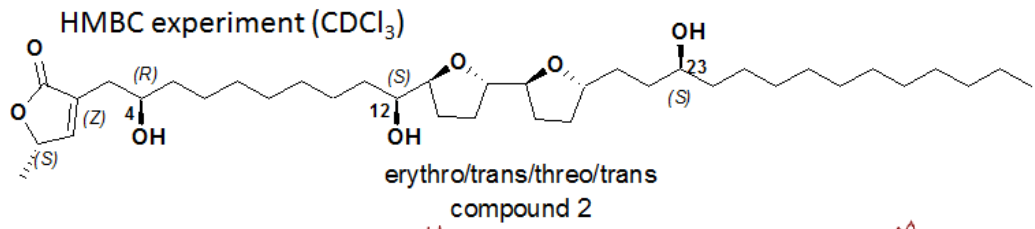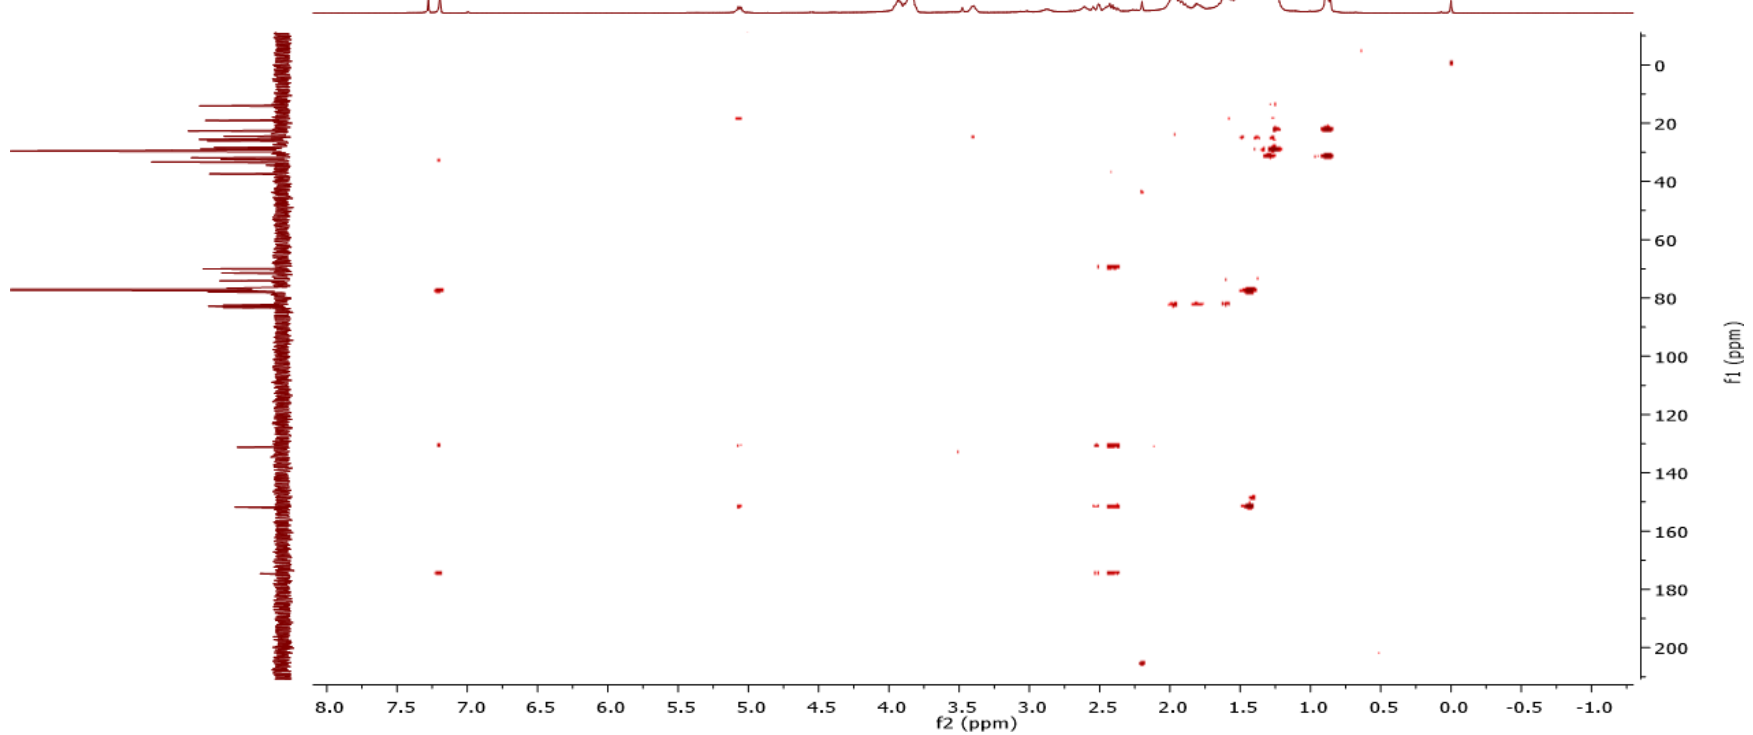

S18 HMBC experiment (CDCl<sub>3</sub>) of 2

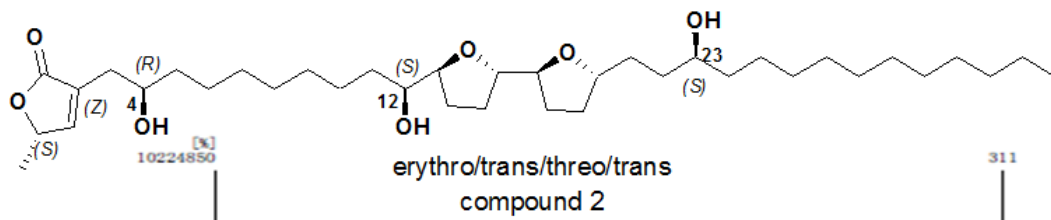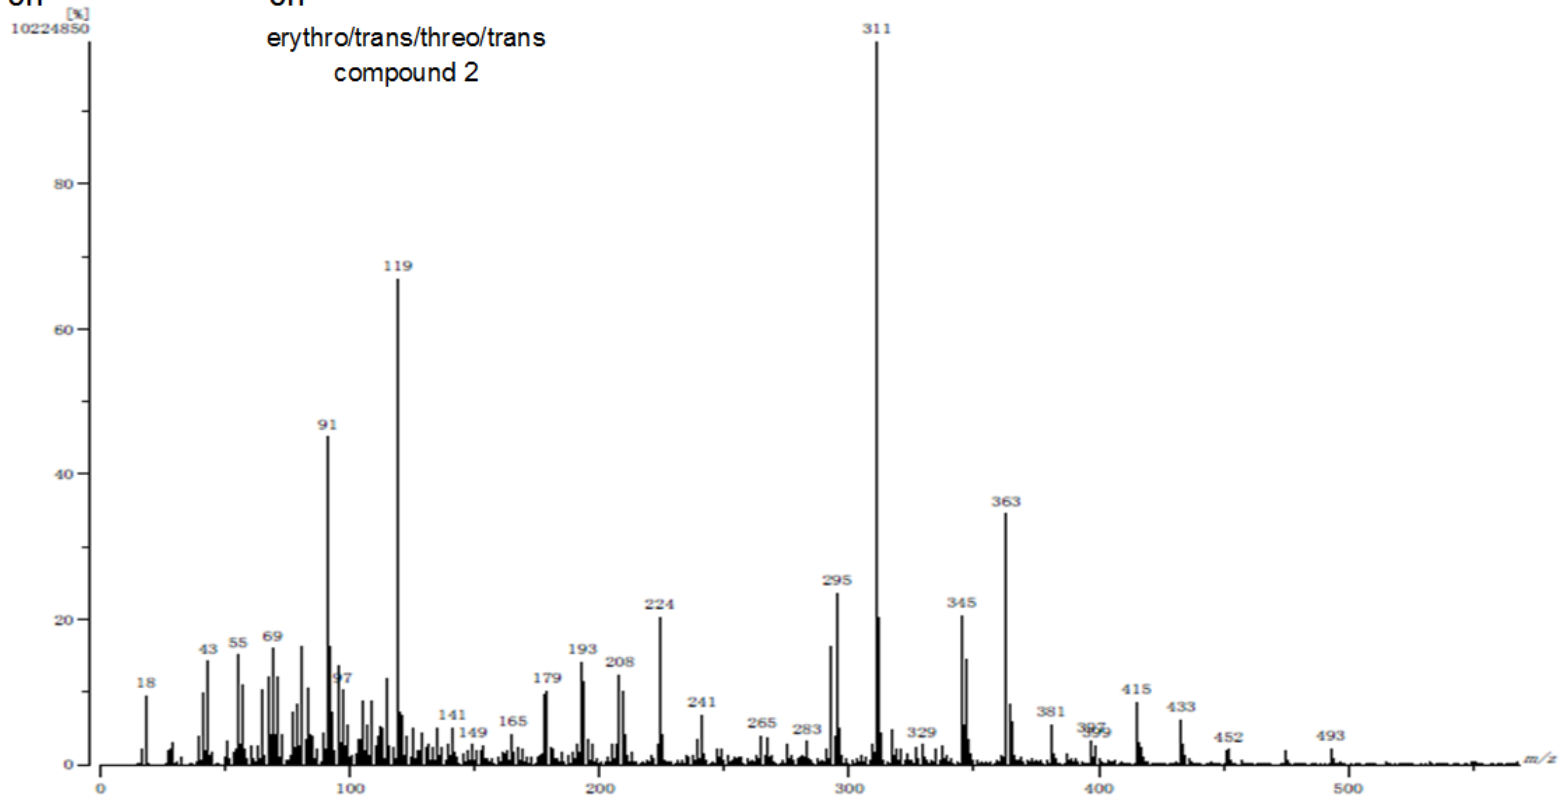

S19 Mass spectrum (IE) of 2

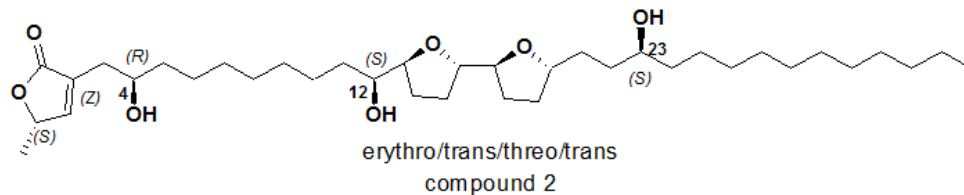

Elemental composition calculator

Target m/z: +645.4700 amu  
 Tolerance: +3.0000 ppm  
 Result type: Elemental  
 Max num of results: 1000  
 Min DBE: -0.5000 Max DBE: +100.0000  
 Electron state: Even  
 Num of charges: 1  
 Add water: N/A  
 Add proton: N/A  
 File Name: J-210618-Ar-1-10-01.wiff

|   | Elements | Min Number | Max Number |
|---|----------|------------|------------|
| 1 | C        | 0          | 50         |
| 2 | H        | 0          | 70         |
| 3 | N        | 0          | 2          |
| 4 | O        | 0          | 10         |
| 5 | Na       | 0          | 2          |

|   | Formula       | Calculated m/z (amu) | mDa Error | PPM Error | DBE |
|---|---------------|----------------------|-----------|-----------|-----|
| 1 | C37 H66 O7 Na | 645.470076           | -0.120240 | -0.186282 | 4.5 |

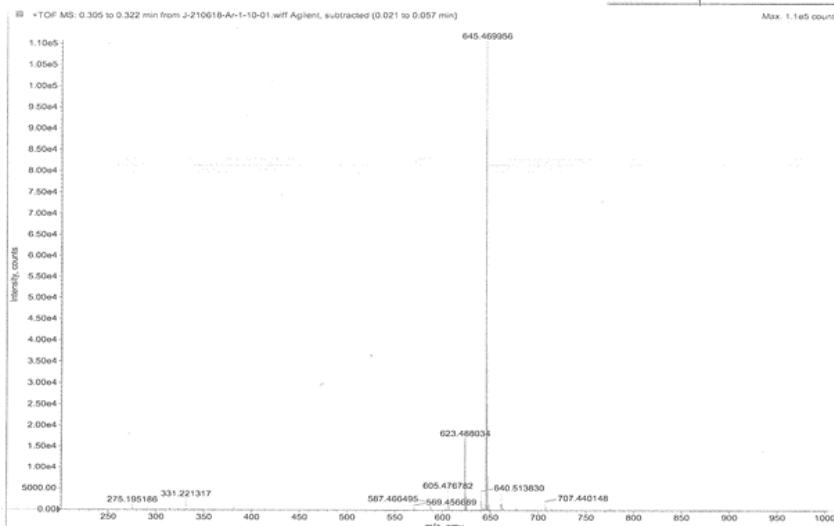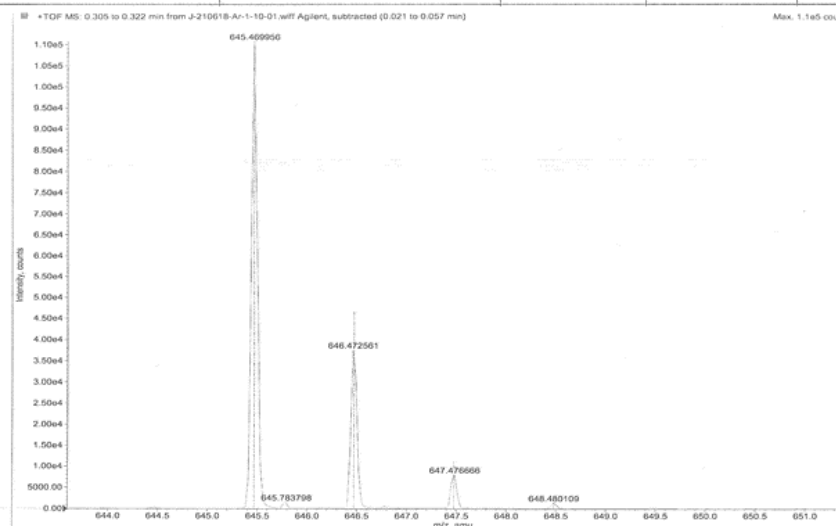

S20 HRMS (ESI-TOF) of compound 2



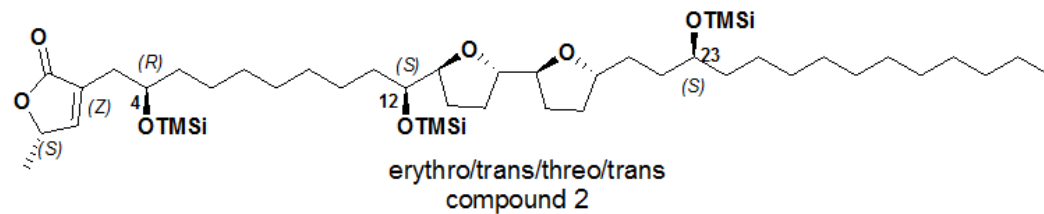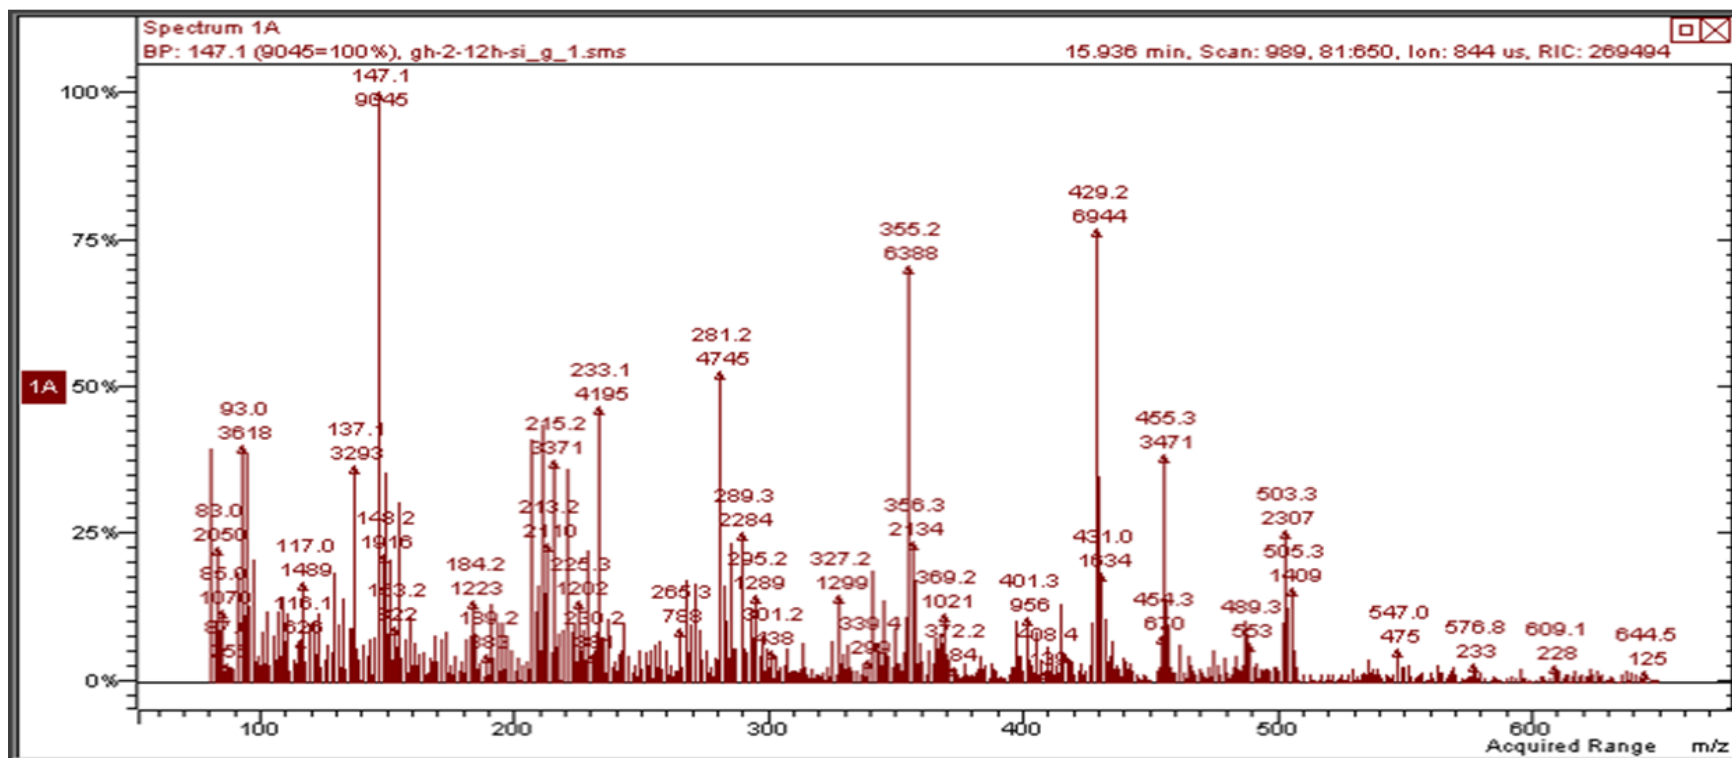

S21 Mass spectrum of the TMSi derivative of 2

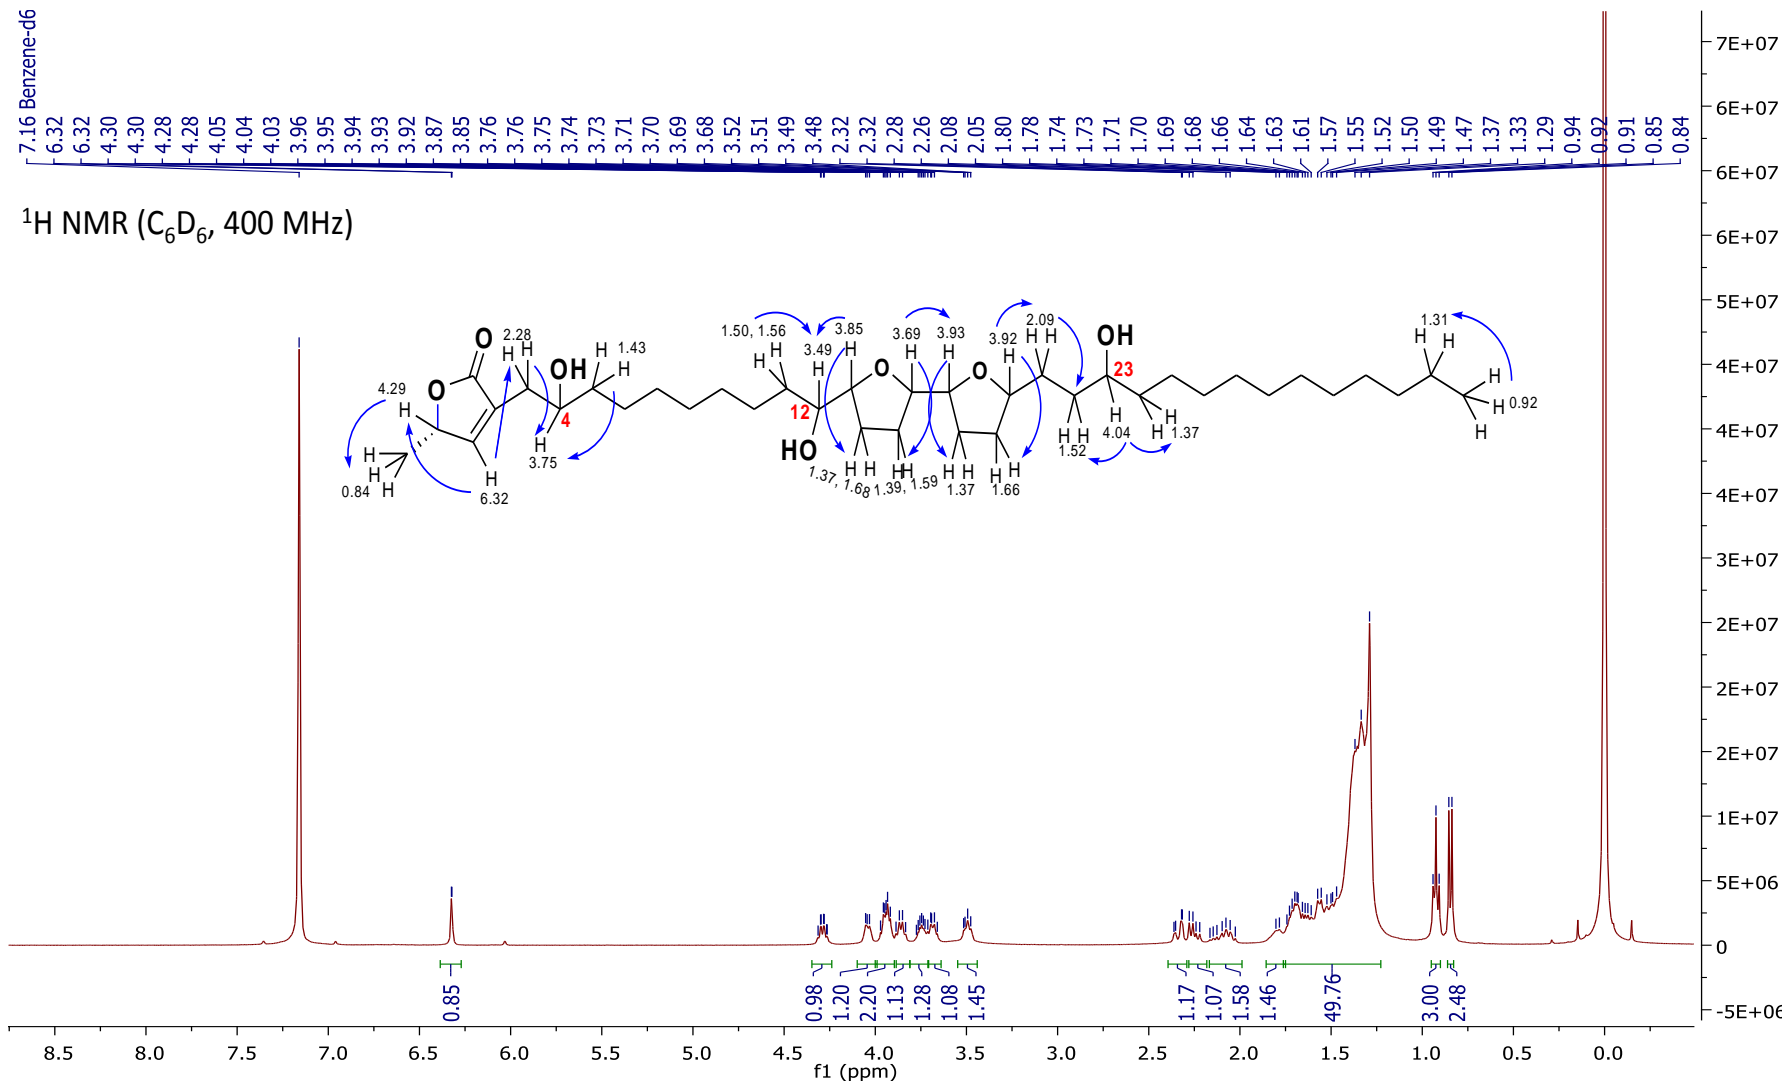

S22 Correlations in COSY and <sup>1</sup>H NMR spectrum (C<sub>6</sub>D<sub>6</sub>) of 2

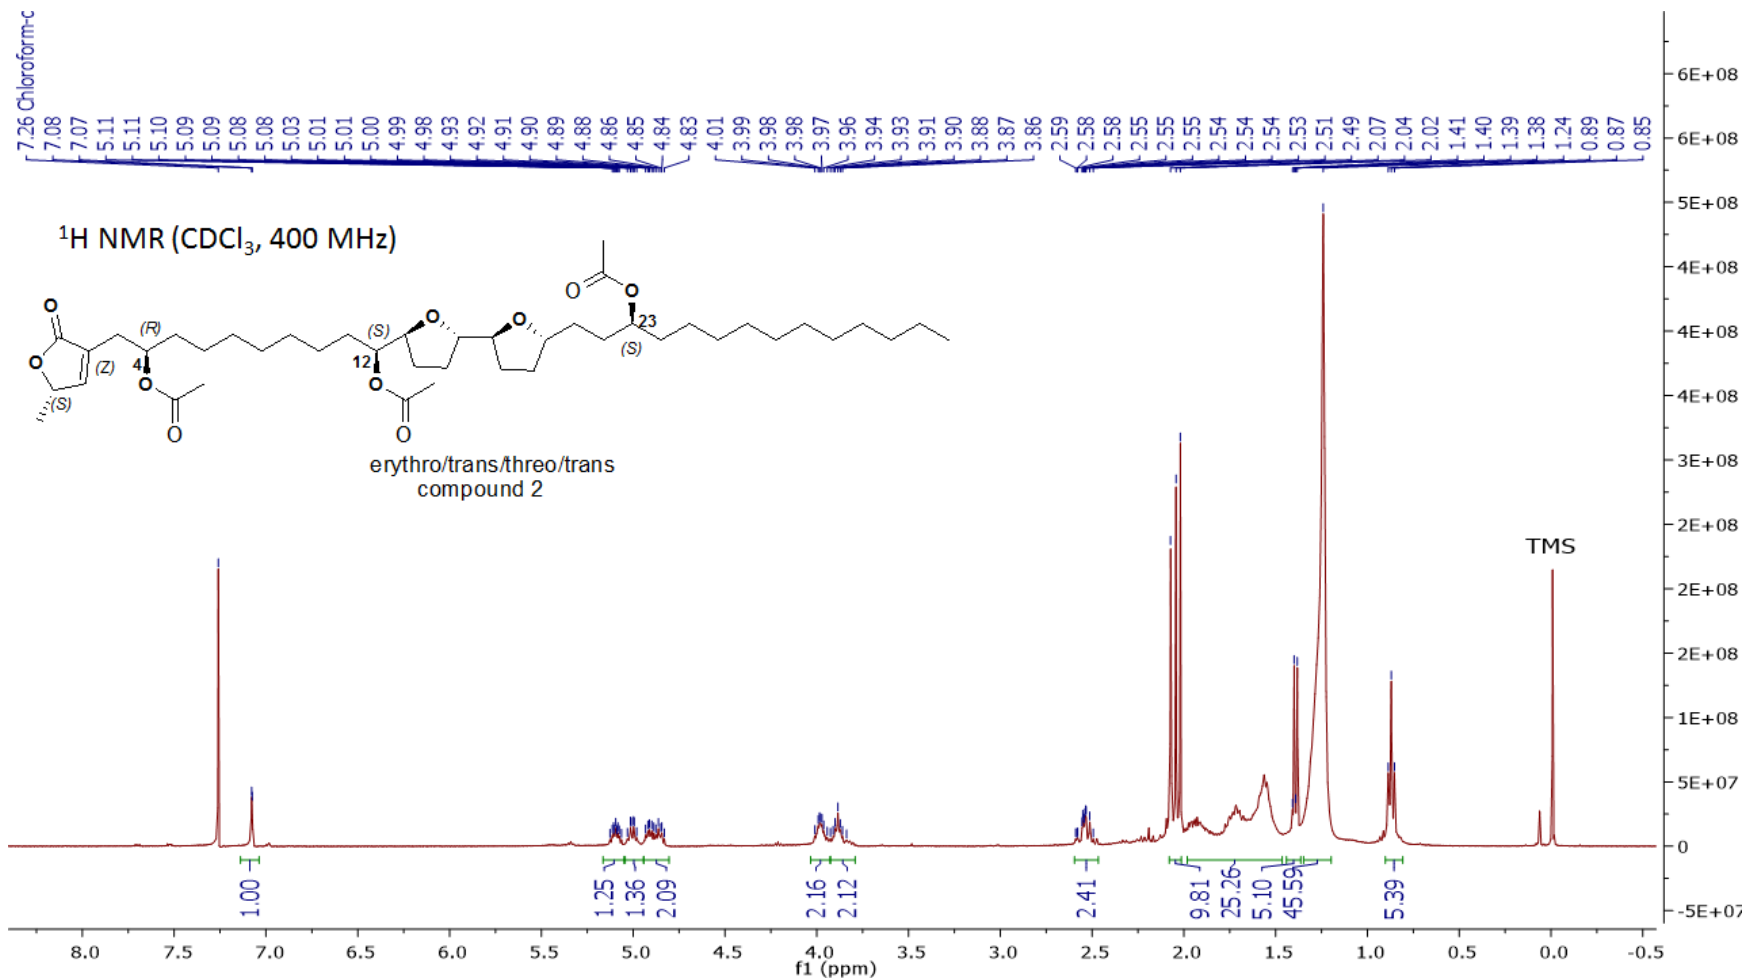

S23 <sup>1</sup>H NMR (400 MHz, CDCl<sub>3</sub>) spectrum of compound 2a





| Annopurpuricin B |                                |                                 |
|------------------|--------------------------------|---------------------------------|
| Experimental     | 6-311G(d,p)/B3LYP <sup>a</sup> | 6-311G(d,p)/ωB97XD <sup>b</sup> |
| 3414.16          | 3687.17                        | 3751.55                         |
| 3371.16          | 3621.53                        | 3686.95                         |
| 2953.01          | 2952.07                        | 2954.12                         |
| 2818.29          | 2826.32                        | 2850.27                         |
| 1738.82          | 1760.50                        | 1800.79                         |
| 1652.02          | 1633.96                        | 1676.20                         |
| 1463.96          | 1464.37                        | 1462.21                         |
| 1401.28          | 1415.27                        | 1409.49                         |
| 1371.38          | 1372.29                        | 1377.12                         |
| 1318.34          | 1323.34                        | 1320.14                         |
| 1197.79          | 1199.52                        | 1200.70                         |
| 1117.74          | 1115.44                        | 1119.65                         |
| 1071.45          | 1077.94                        | 1071.42                         |
| 1025.16          | 1025.28                        | 1029.94                         |
| 913.29           | 913.07                         | 916.038                         |
| 849.64           | 850.09                         | 849.07                          |
| 790.81           | 788.74                         | 799.02                          |
| 721.37           | 722.28                         | 721.99                          |
| 629.75           | 638.87                         | 655.81                          |
| 597.93           | 597.82                         | 607.31                          |
| 577.67           | 580.27                         | 584.22                          |

<sup>a</sup> Scaling factor of 0.9614

<sup>b</sup> Scaling factor of 0.957

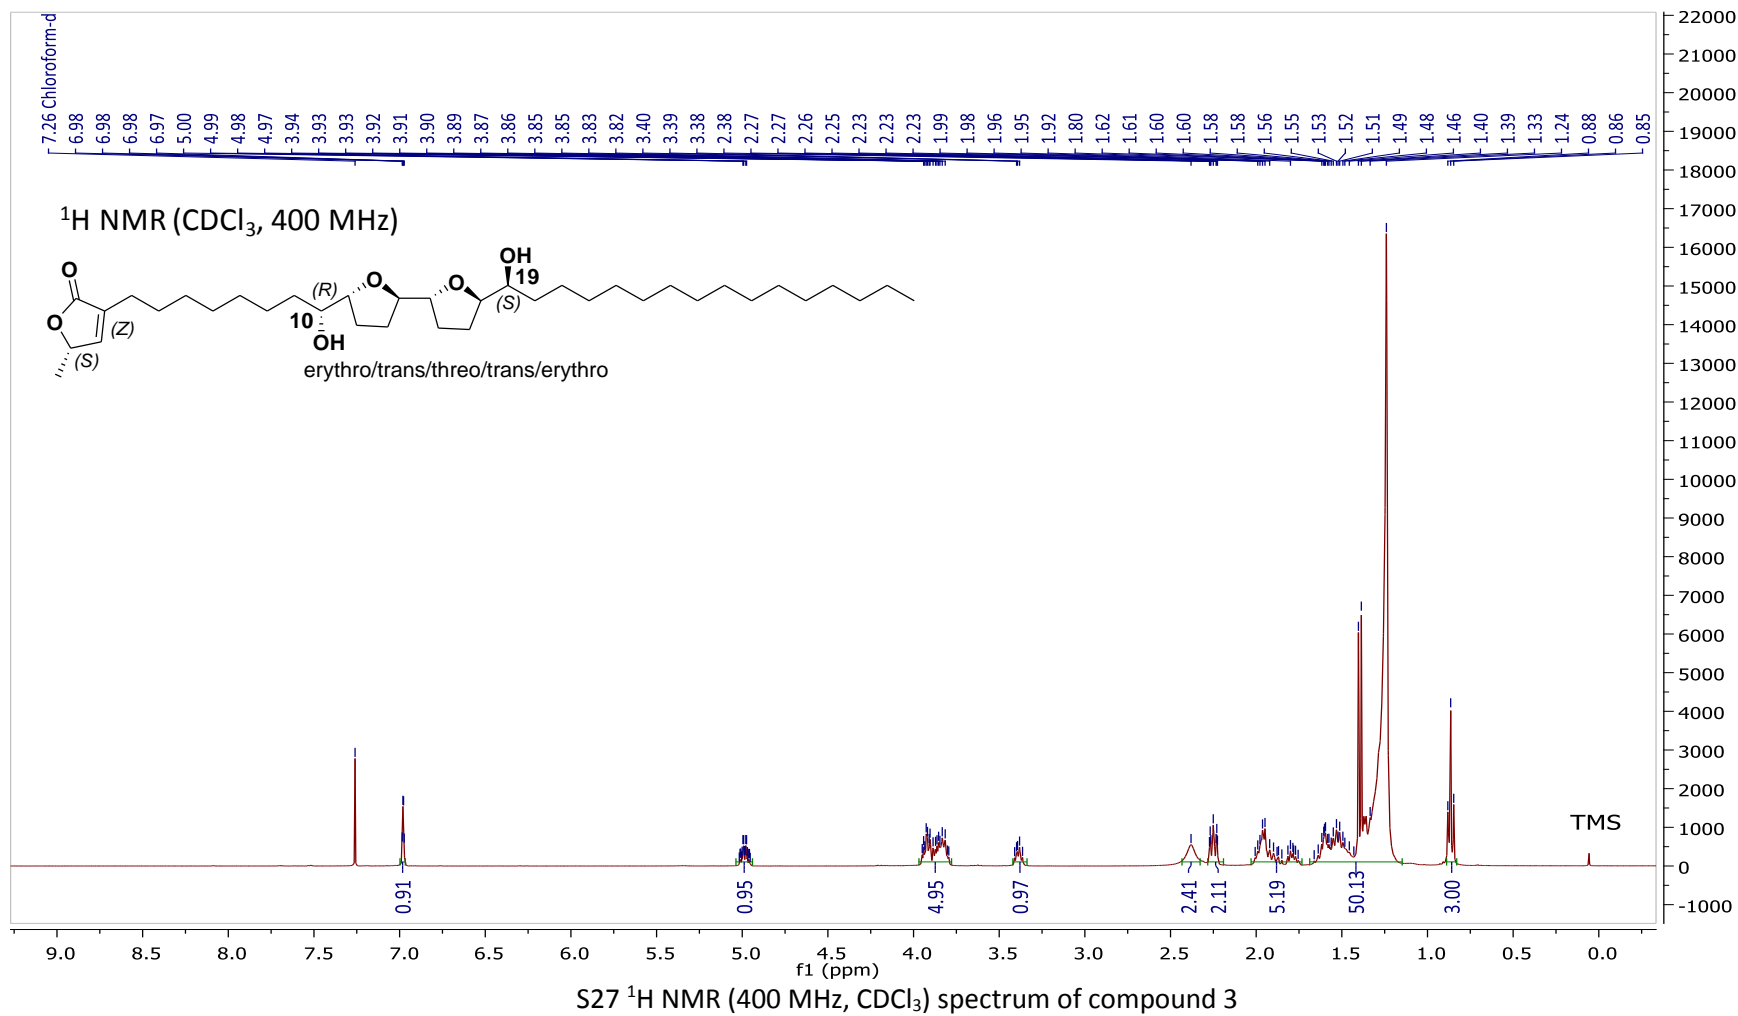

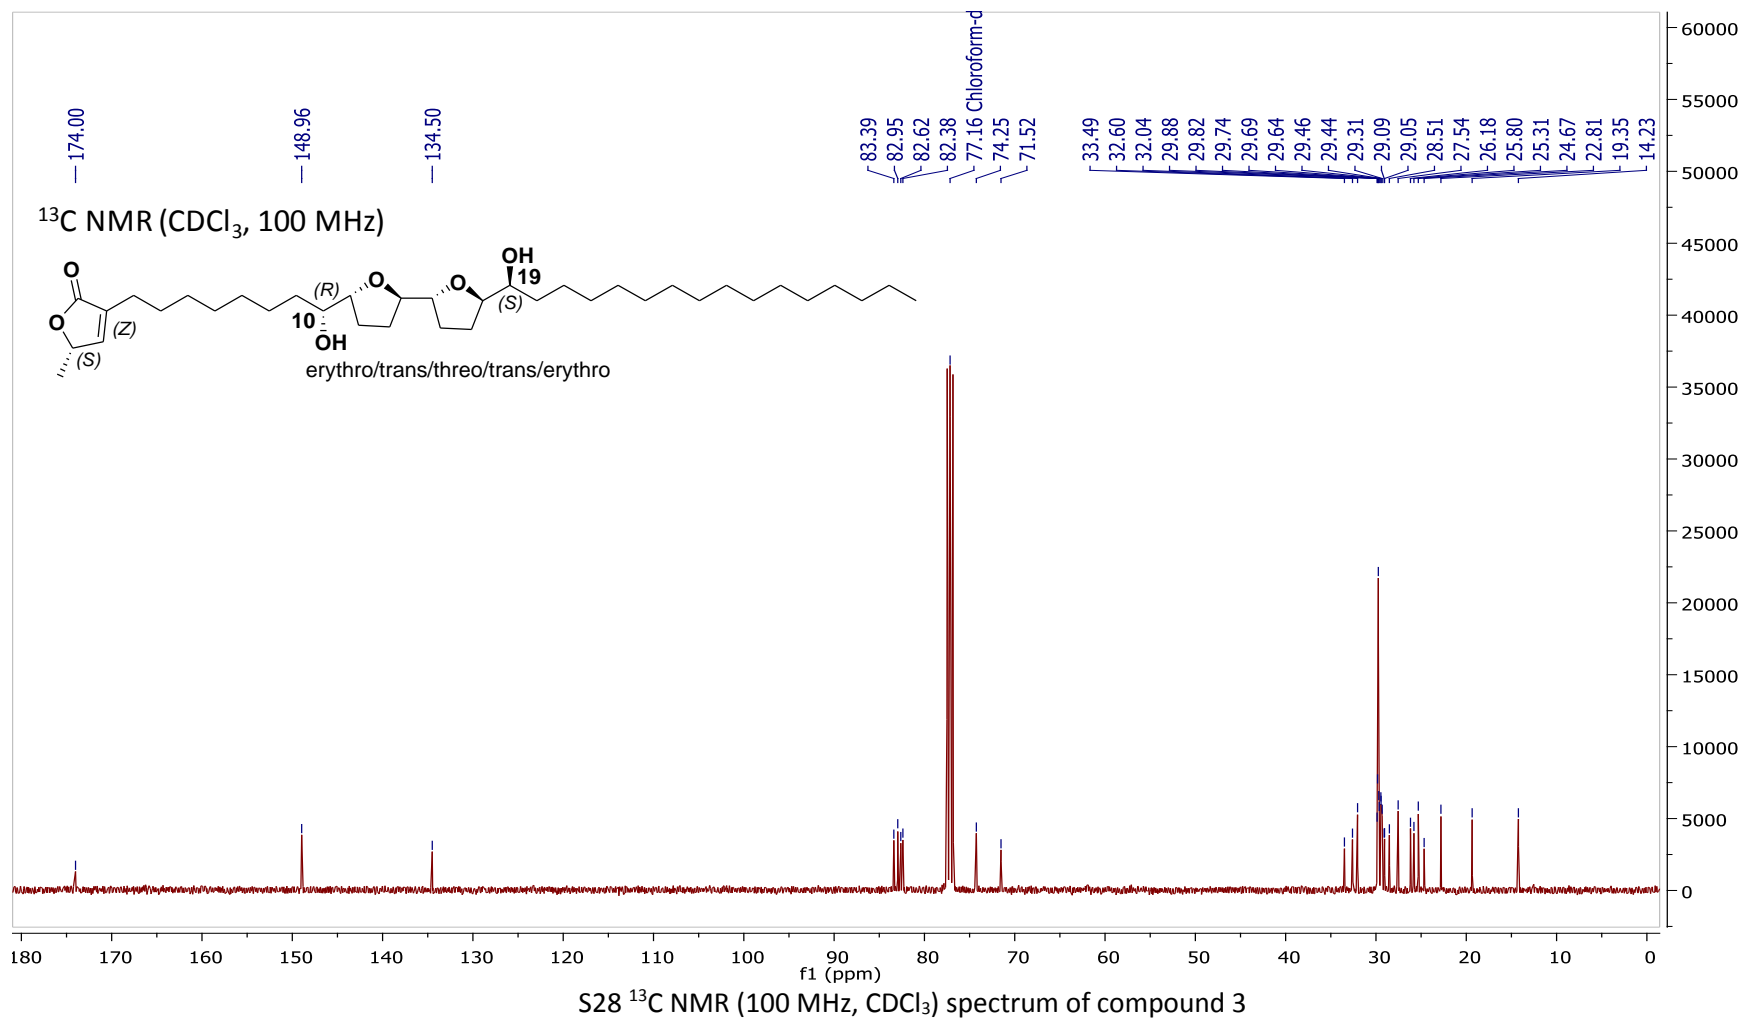



COSY experiment (CDCl<sub>3</sub>)

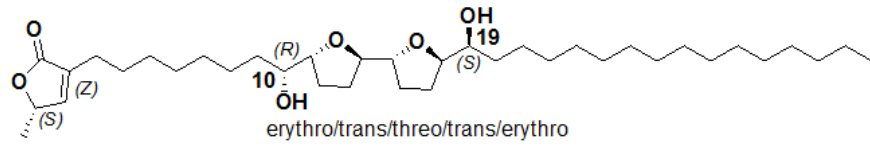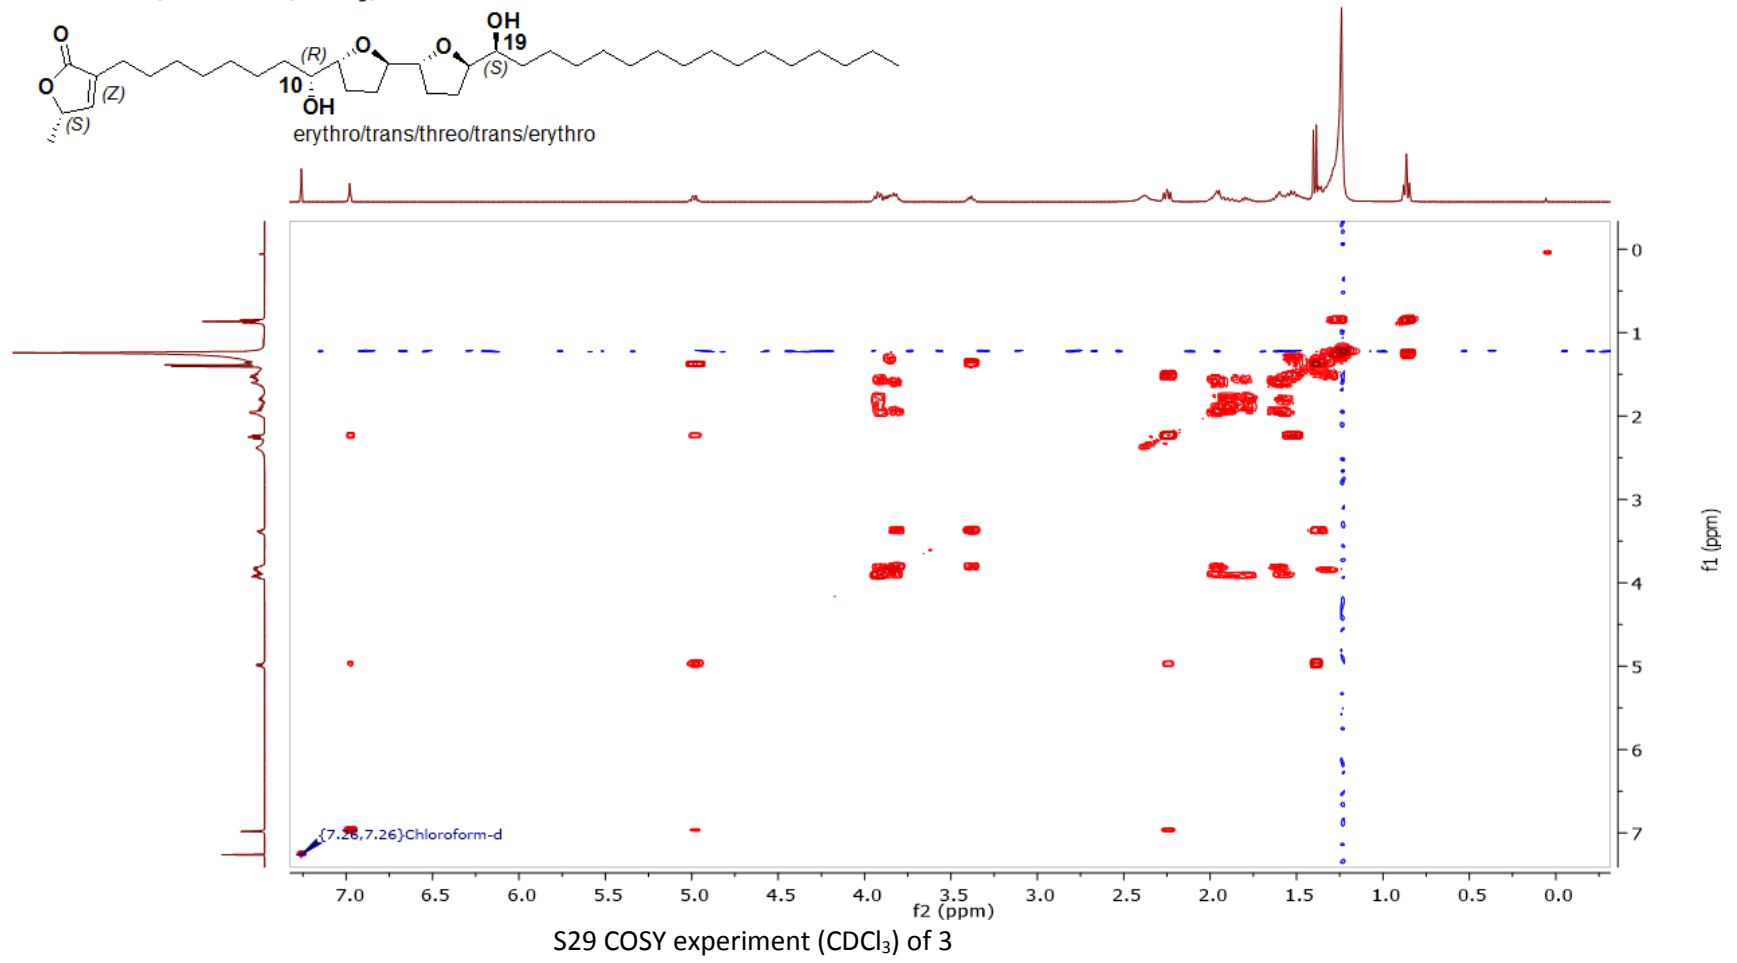

HSQC experiment (CDCl<sub>3</sub>)

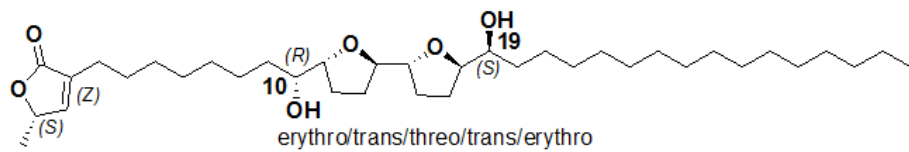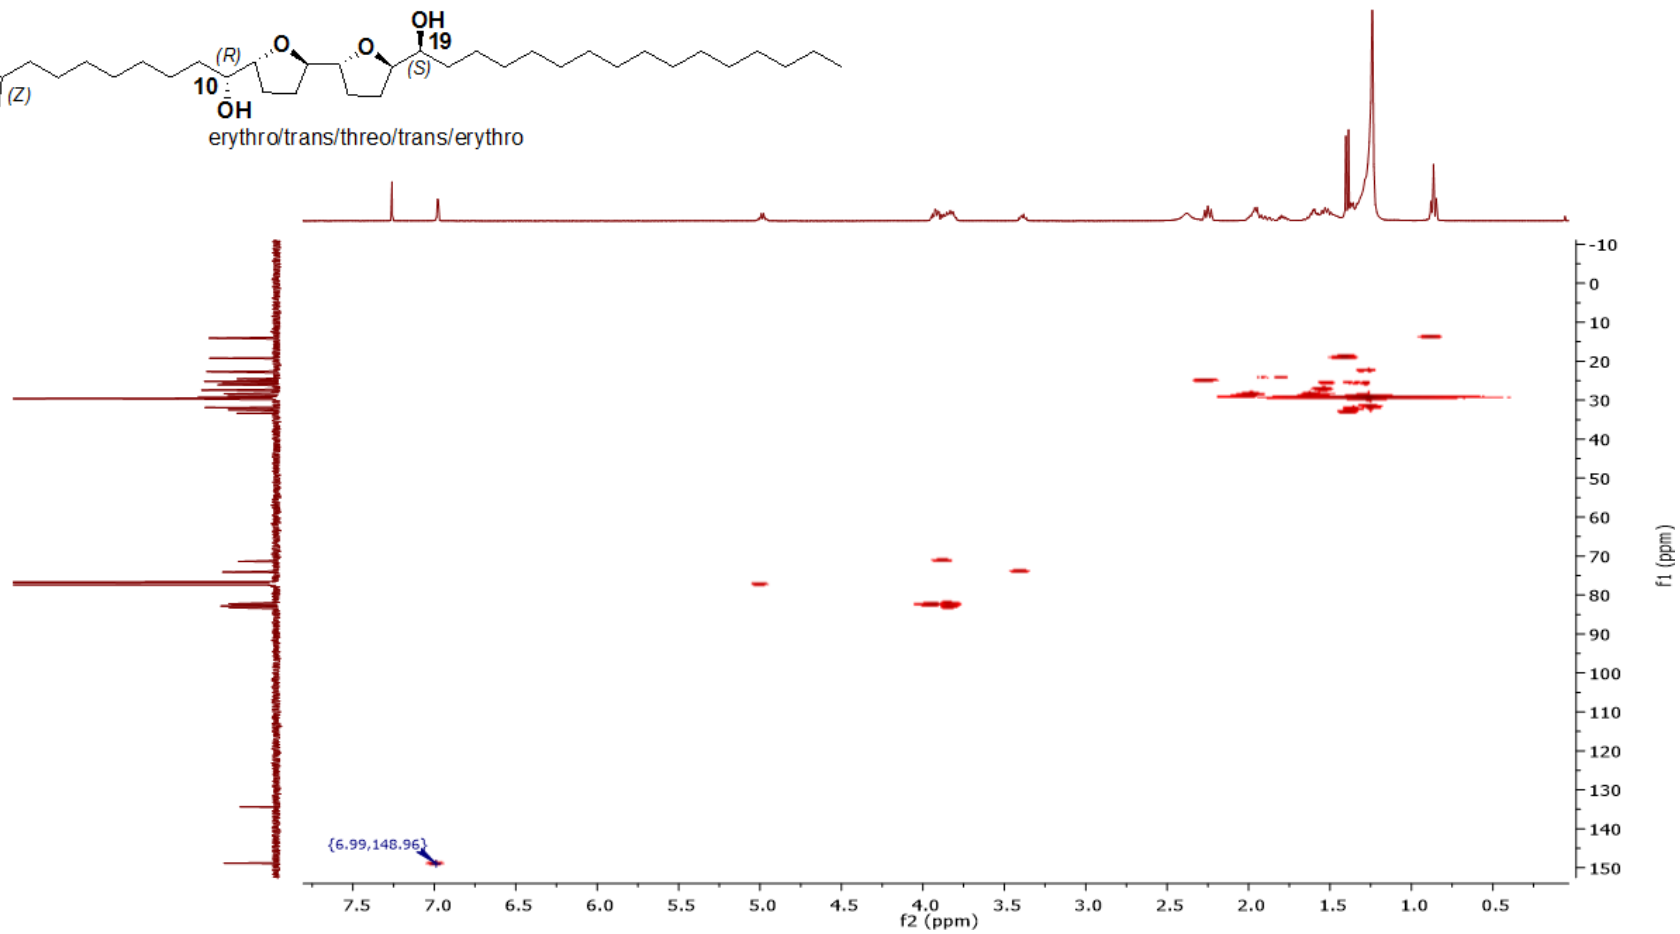

S30 HSQC experiment (CDCl<sub>3</sub>) of 3

HMBC experiment (CDCl<sub>3</sub>)

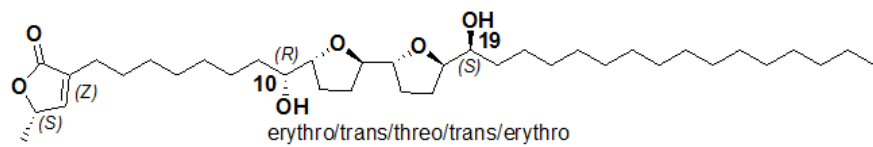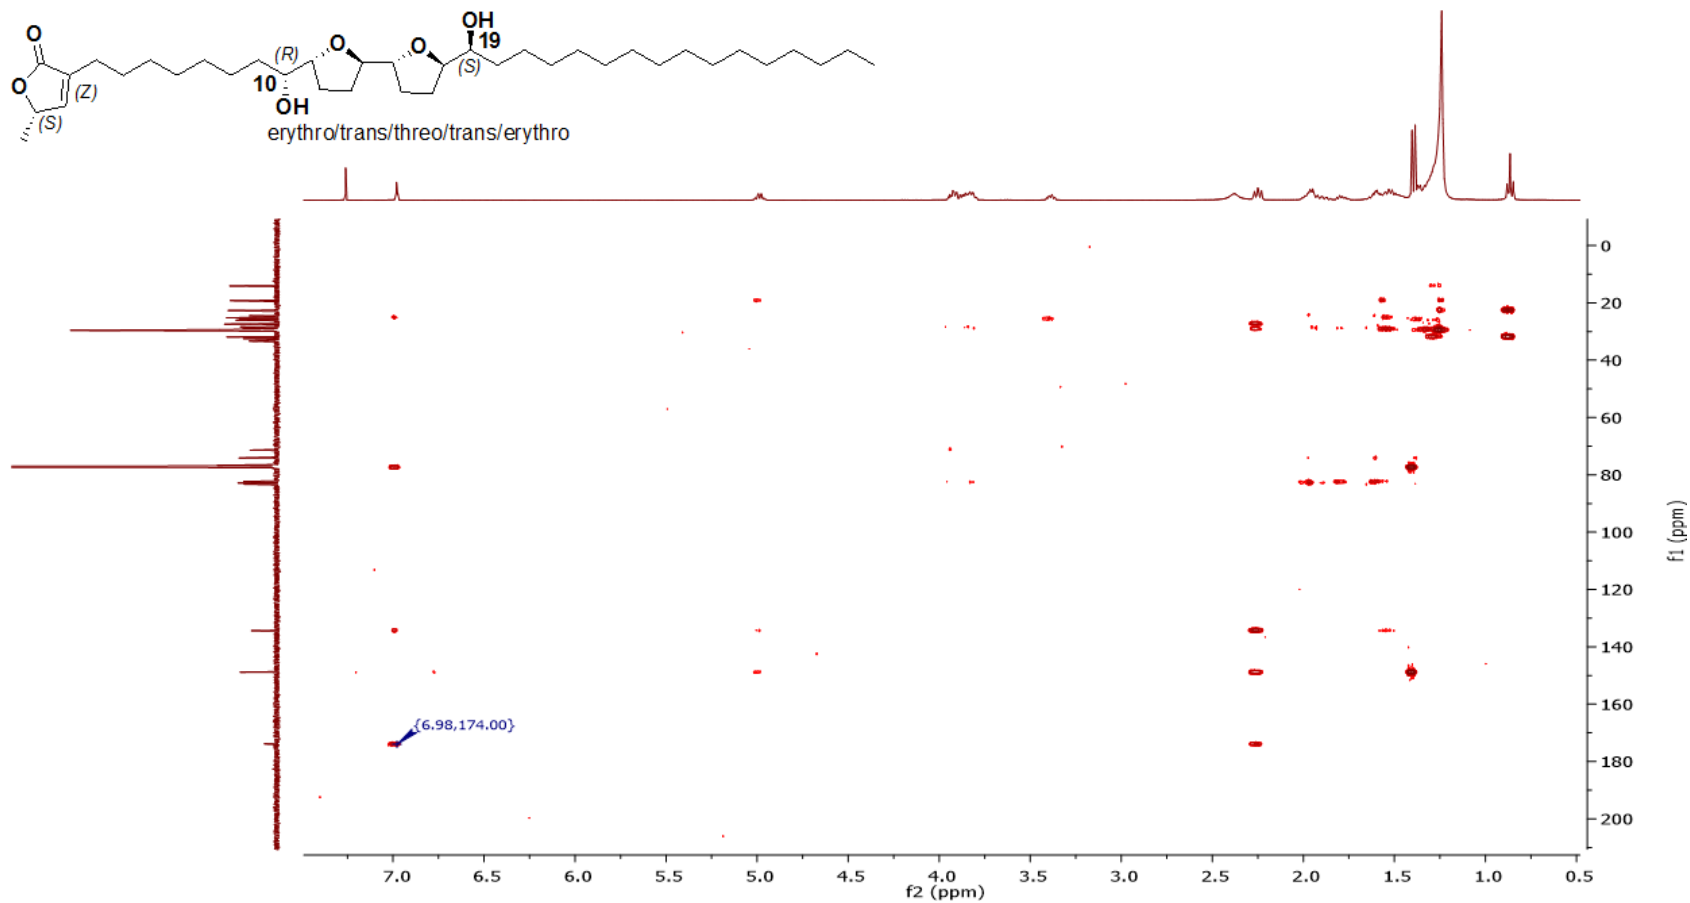

S31 HMBC experiment (CDCl<sub>3</sub>) of 3

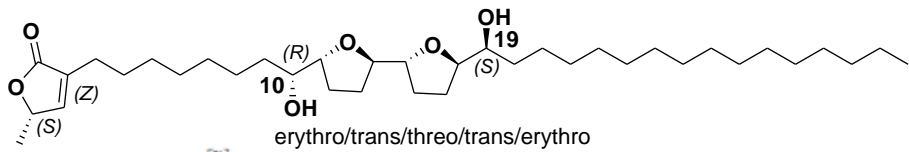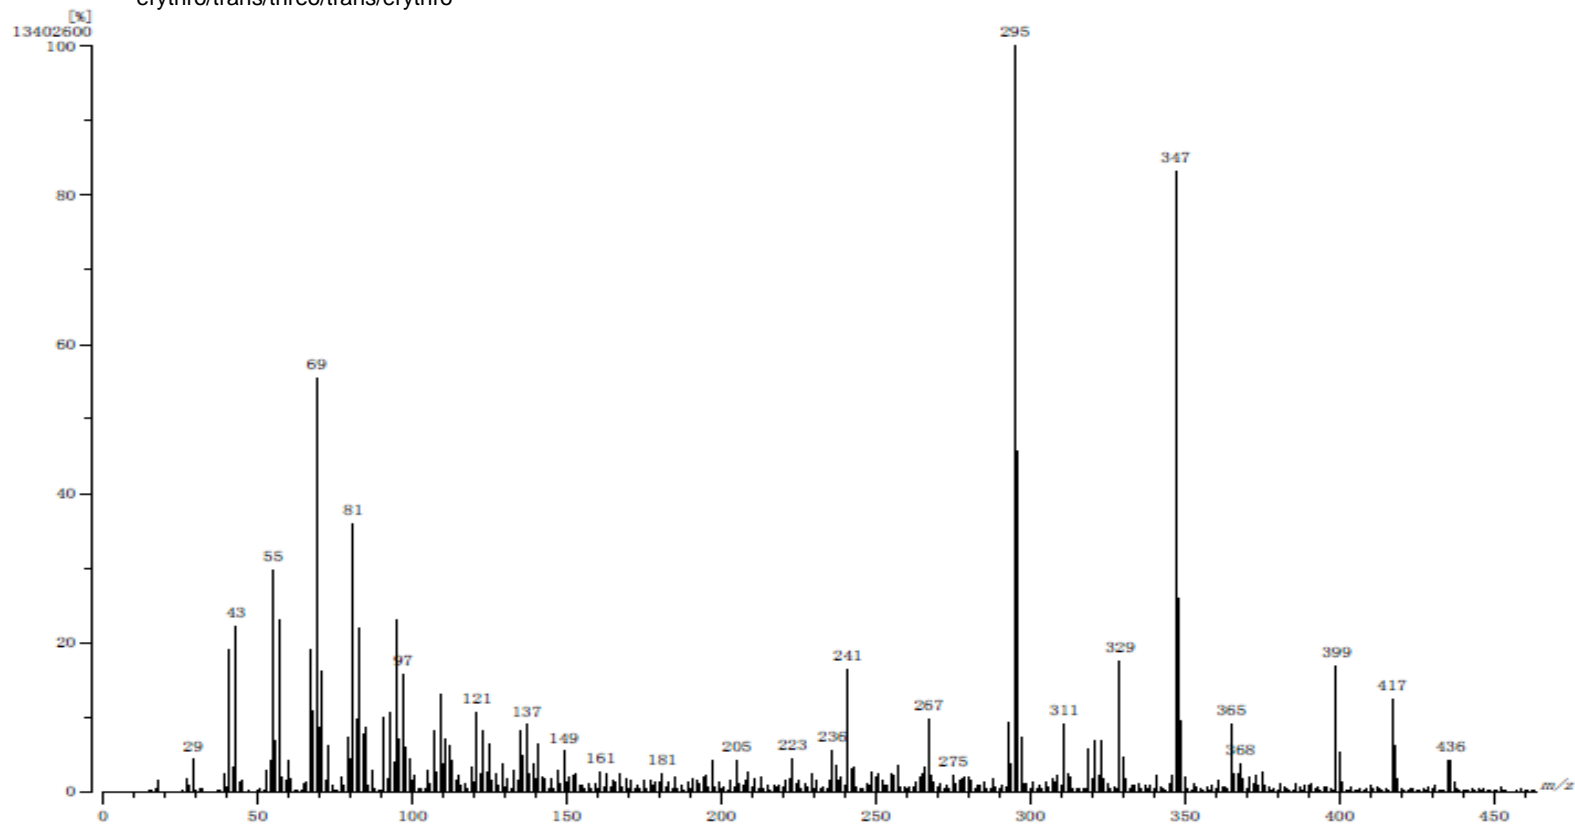

S32 Mass spectrum (IE) of 3

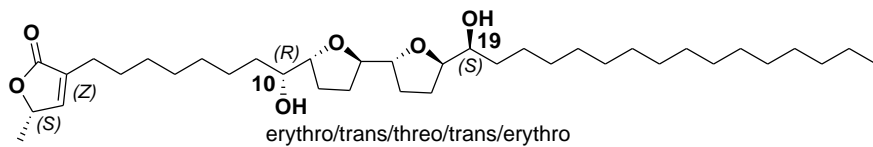

Elemental composition calculator

Target m/z: +629.4753 amu  
 Tolerance: +3.0000 ppm  
 Result type: Elemental  
 Max num of results: 1000  
 Min DBE: -0.5000 Max DBE: +100.0000  
 Electron state: Even  
 Num of charges: 1  
 Add water: N/A  
 Add proton: N/A  
 File Name: J-210618-Ar-1-11-01.wiff

|   | Elements | Min Number | Max Number |
|---|----------|------------|------------|
| 1 | C        | 0          | 50         |
| 2 | H        | 0          | 70         |
| 3 | N        | 0          | 2          |
| 4 | O        | 0          | 10         |
| 5 | Na       | 0          | 2          |

|   | Formula       | Calculated m/z (amu) | mDa Error | PPM Error | DBE |
|---|---------------|----------------------|-----------|-----------|-----|
| 1 | C37 H66 O6 Na | 629.475161           | 0.175399  | 0.278644  | 4.5 |

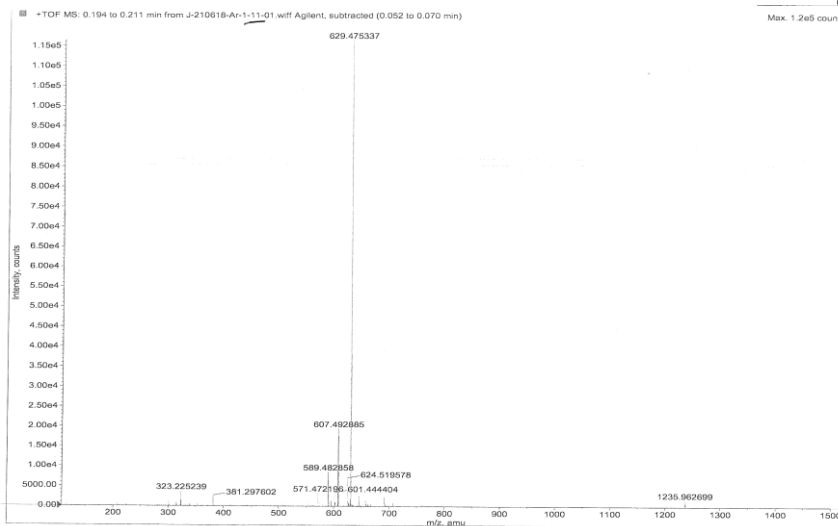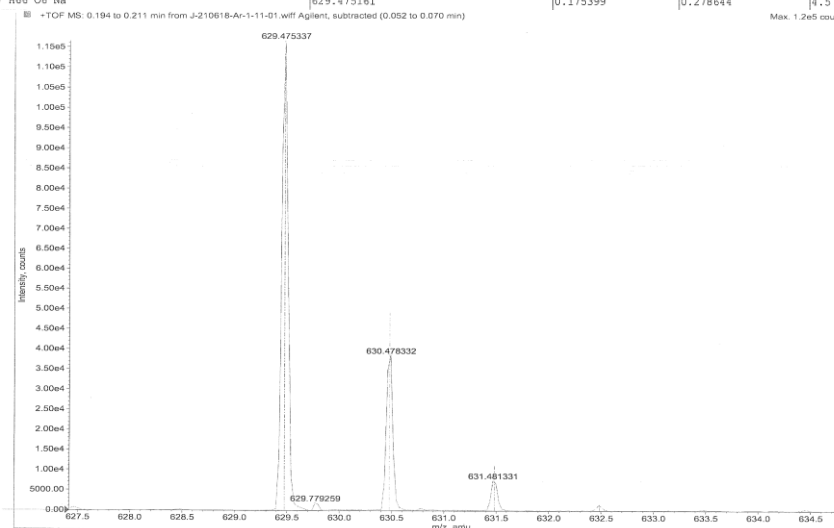

S33 HRMS (ESI-TOF) of compound 3

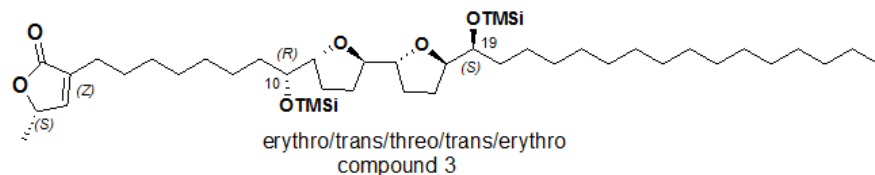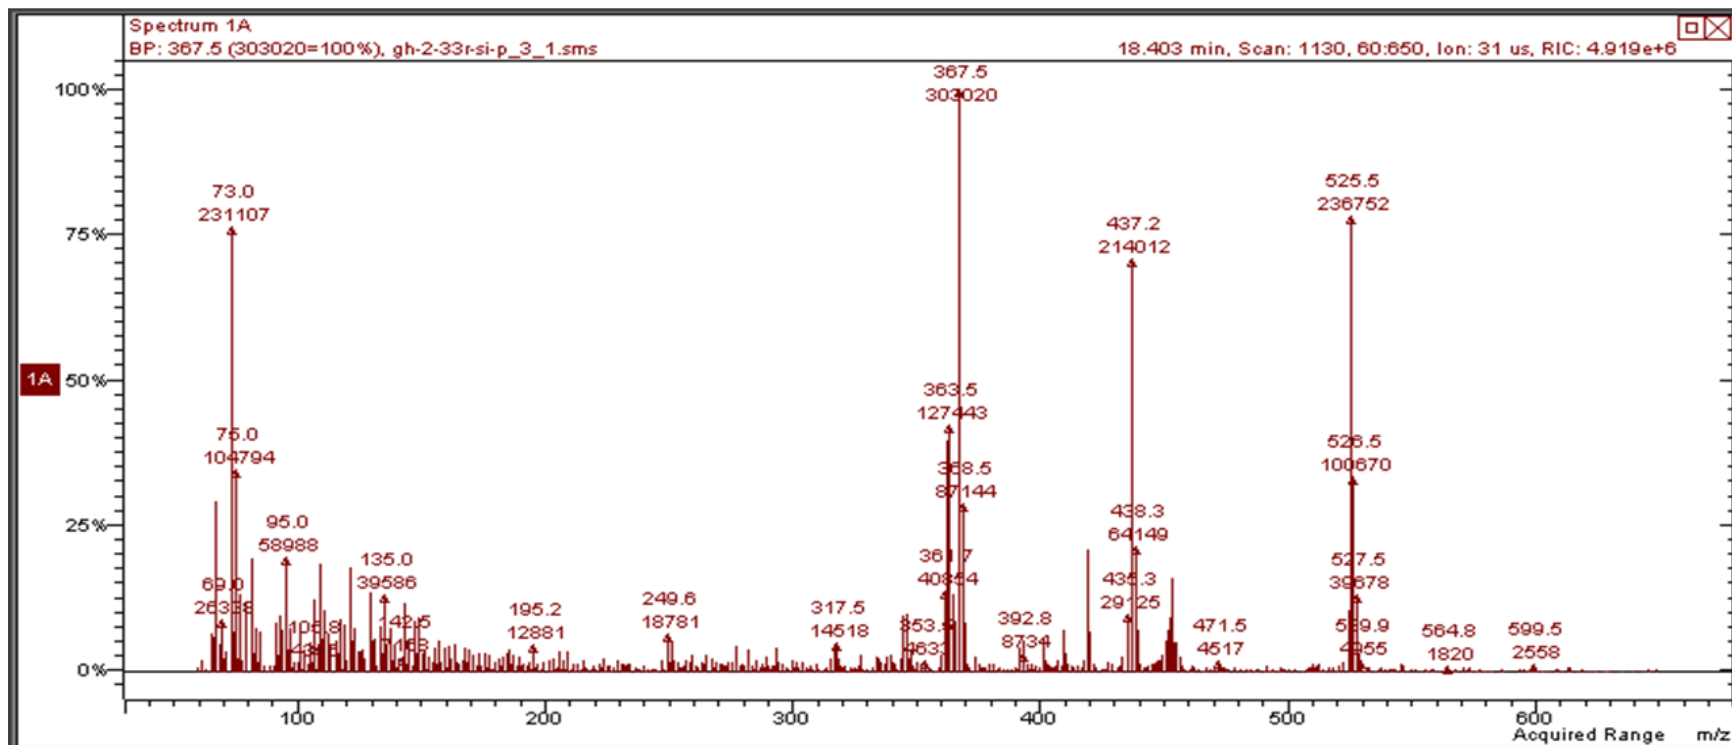

S34 Mass spectrum of the TMSi derivative of 3

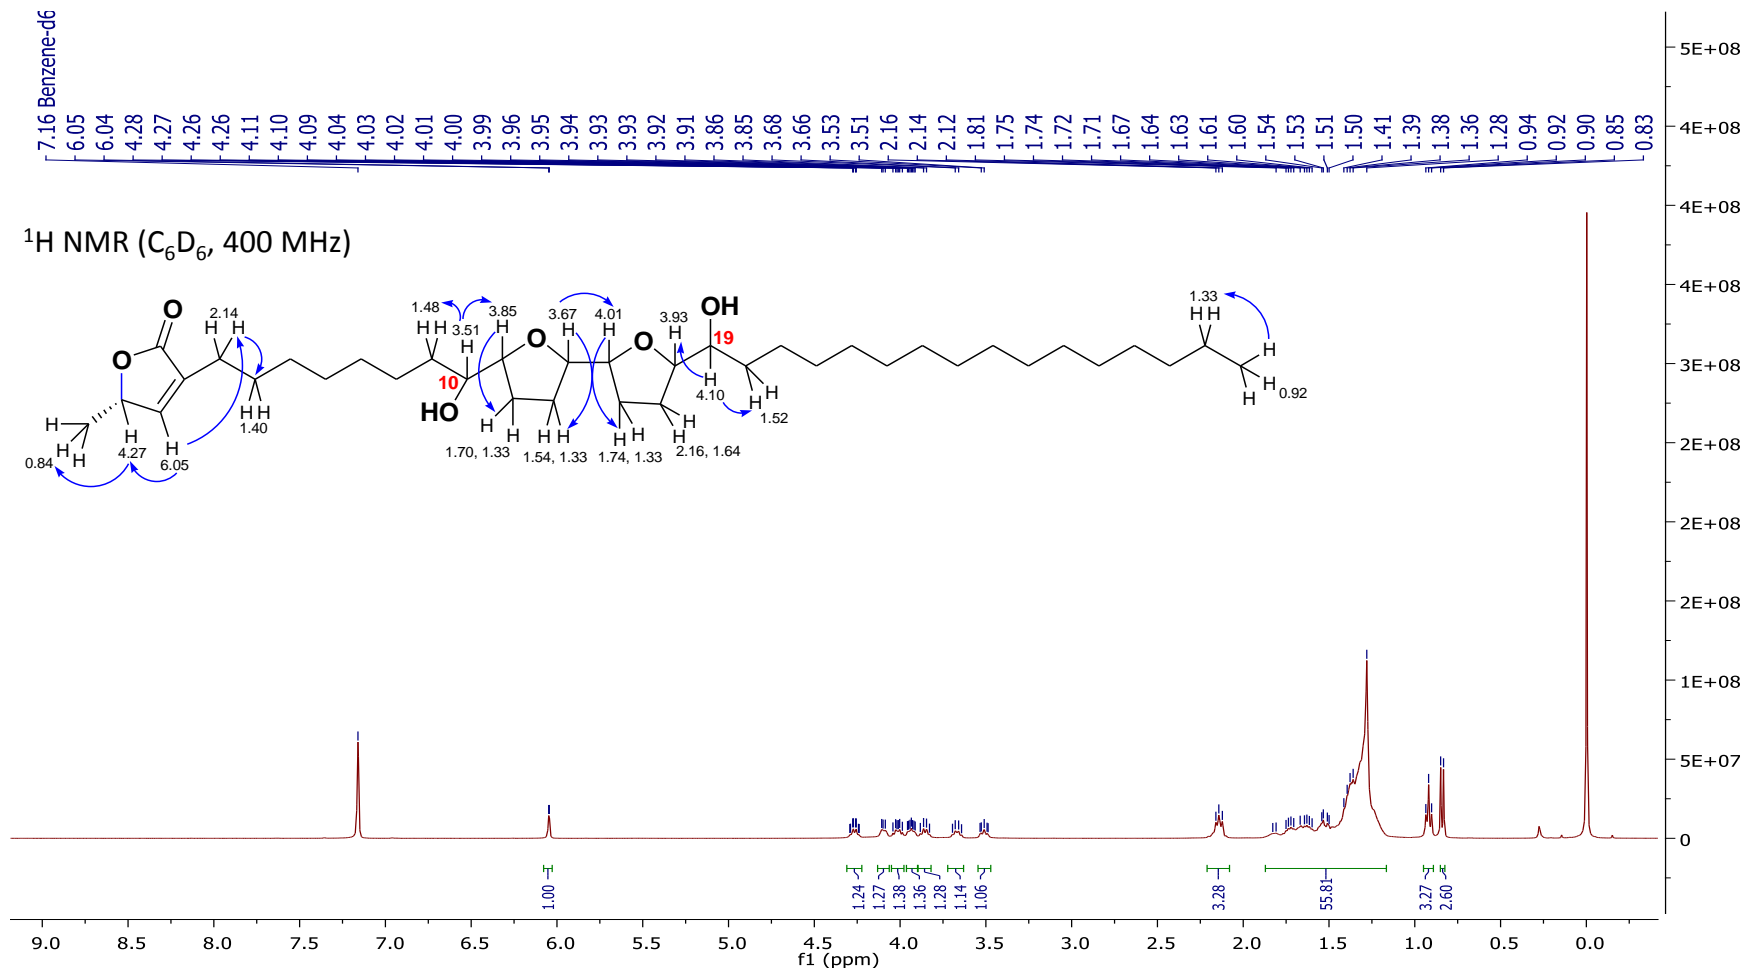

S35 Correlations in COSY and <sup>1</sup>H NMR spectrum (C<sub>6</sub>D<sub>6</sub>) of 3

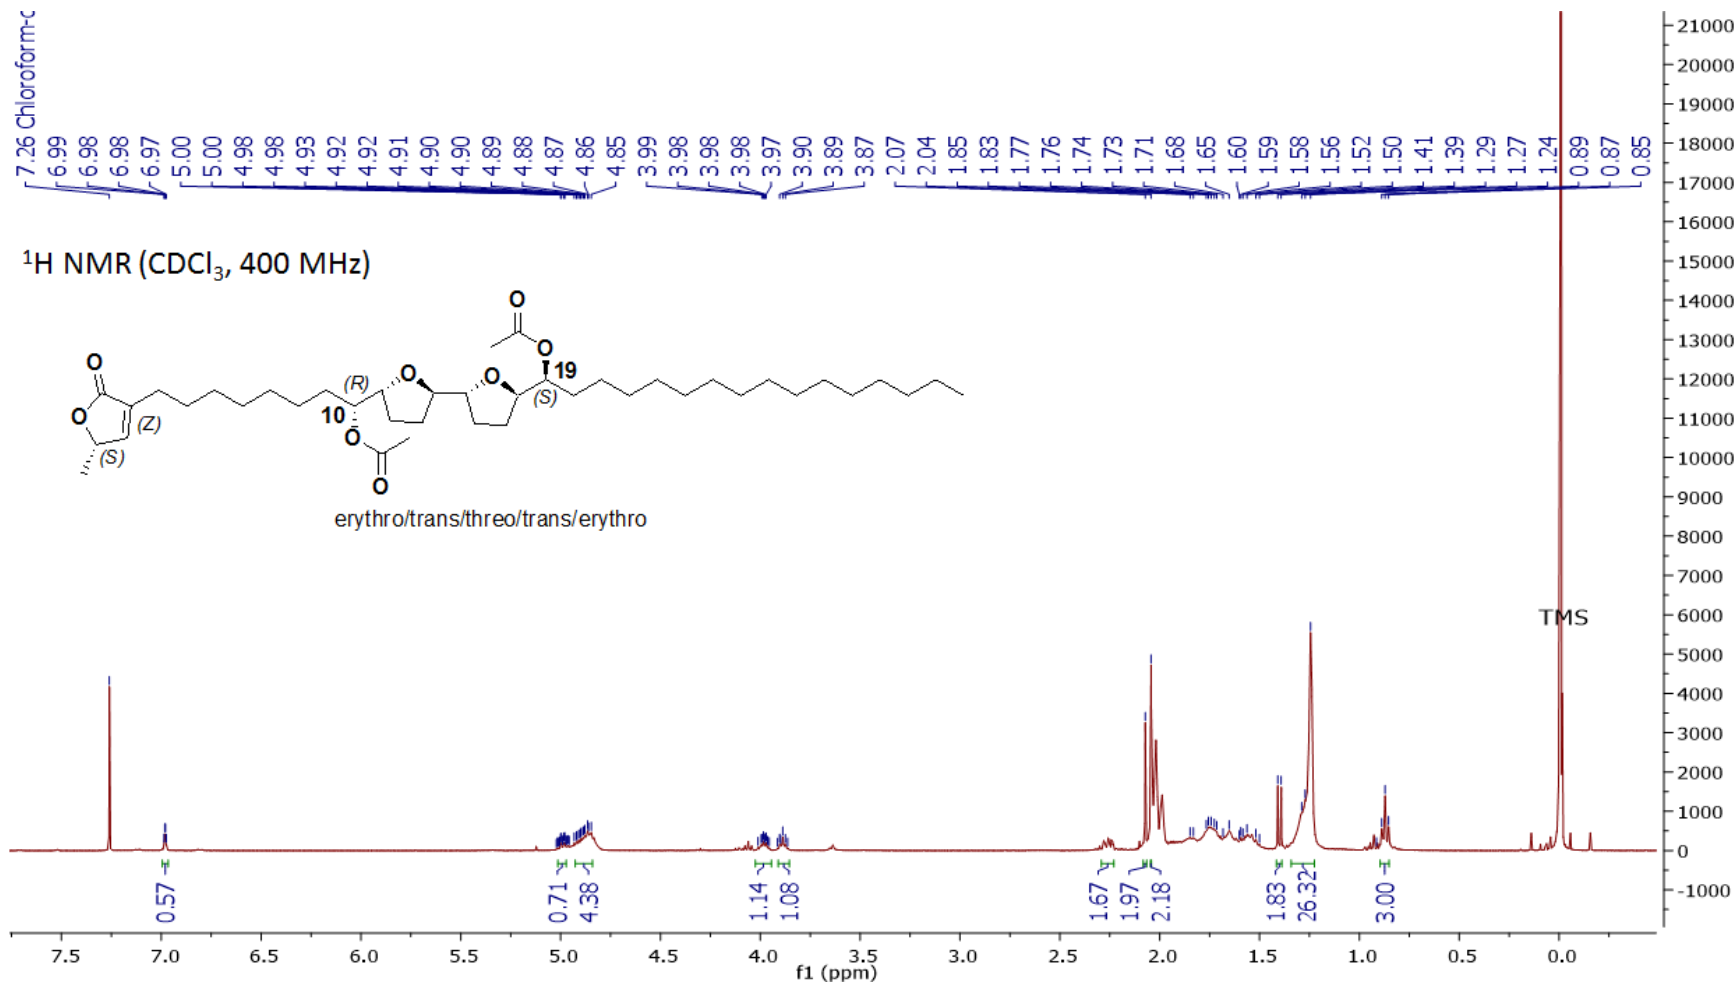

S36 <sup>1</sup>H NMR (400 MHz, CDCl<sub>3</sub>) spectrum of compound 3a





COSY experiment, Mosher ester **5** (CDCl<sub>3</sub>)

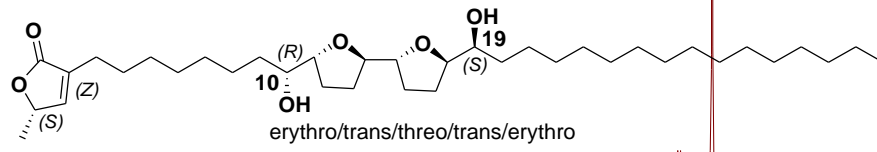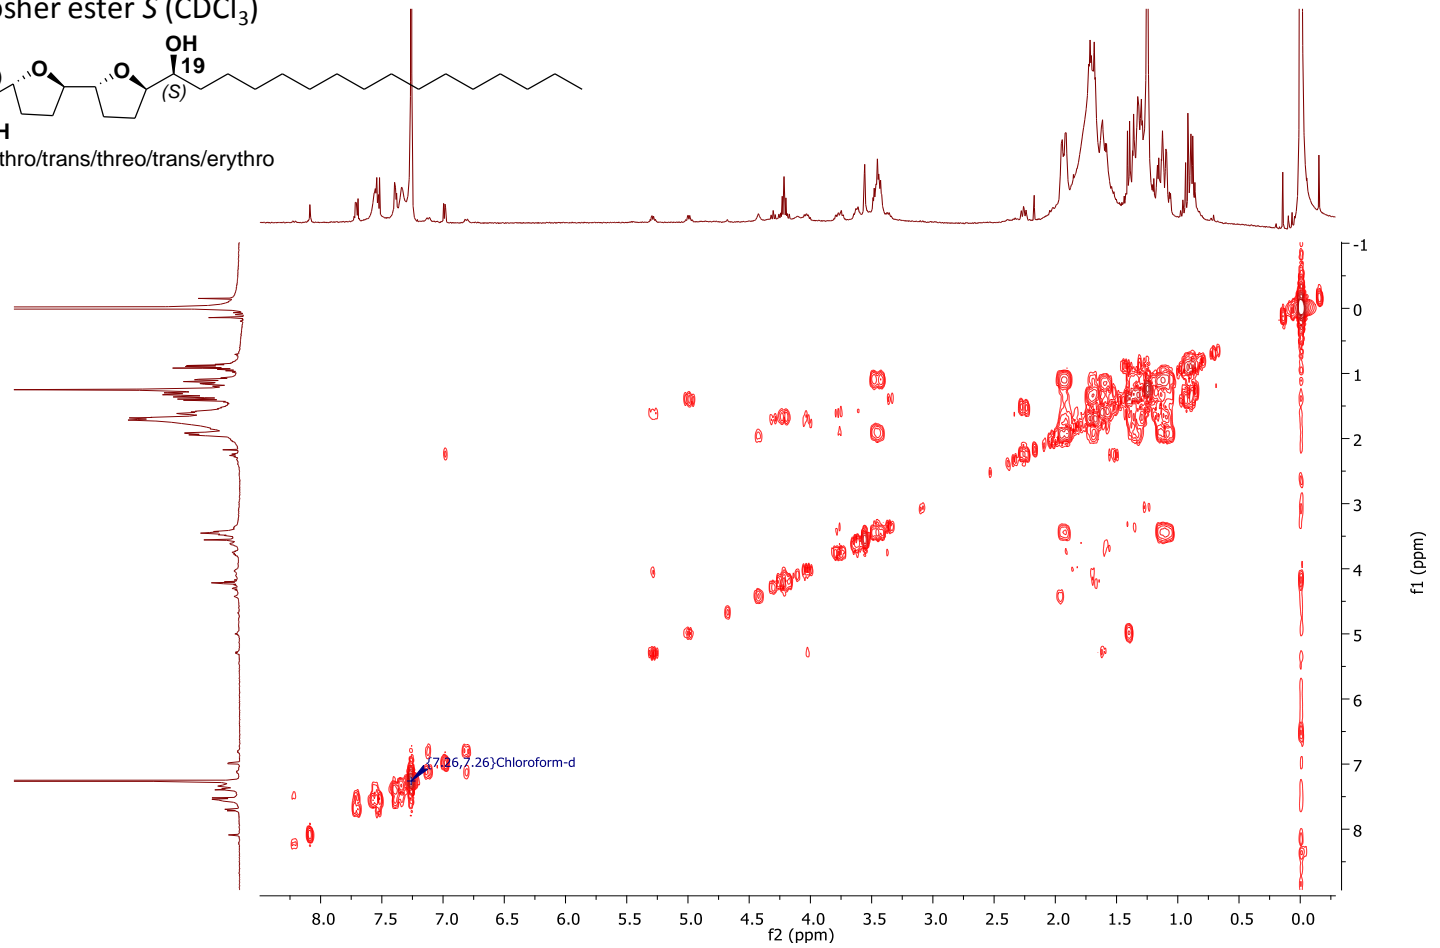

S38 COSY experiment (CDCl<sub>3</sub>), Mosher ester **5** of **3**

| Annopurpuricin C |                                |                                 |
|------------------|--------------------------------|---------------------------------|
| Experimental     | 6-311G(d,p)/B3LYP <sup>a</sup> | 6-311G(d,p)/ωB97XD <sup>b</sup> |
| 3414.96          | 3696.59                        | 3703.62                         |
| 3373.49          | 3662.96                        | 3672.85                         |
| 2953.01          | 2957.93                        | 2954.76                         |
| 2916.36          | 2921.99                        | 2916.93                         |
| 2848.85          | 2850.15                        | 2854.99                         |
| 1742.68          | 1768.09                        | 1778.42                         |
| 1653.95          | 1641.06                        | 1654.46                         |
| 1471.68          | 1460.13                        | 1457.46                         |
| 1399.55          | 1423.16                        | 1415.79                         |
| 1314.48          | 1314.38                        | 1321.17                         |
| 1209.36          | 1212.24                        | 1210.14                         |
| 1167.89          | 1169.83                        | 1170.13                         |
| 1145.71          | 1145.47                        | 1149.94                         |
| 1111.95          | 1123.31                        | 1113.32                         |
| 1079.49          | 1083.09                        | 1081.58                         |
| 1049.27          | 1043.45                        | 1048.90                         |
| 1019.37          | 1021.23                        | 1019.15                         |
| 960.54           | 963.08                         | 959.75                          |
| 928.72           | 926.29                         | 928.55                          |
| 912.32           | 914.13                         | 916.16                          |
| 858.32           | 859.44                         | 860.74                          |
| 788.88           | 786.59                         | 789.28                          |
| 720.09           | 717.43                         | 721.12                          |

<sup>a</sup> Scaling factor of 0.9614

<sup>b</sup> Scaling factor of 0.957

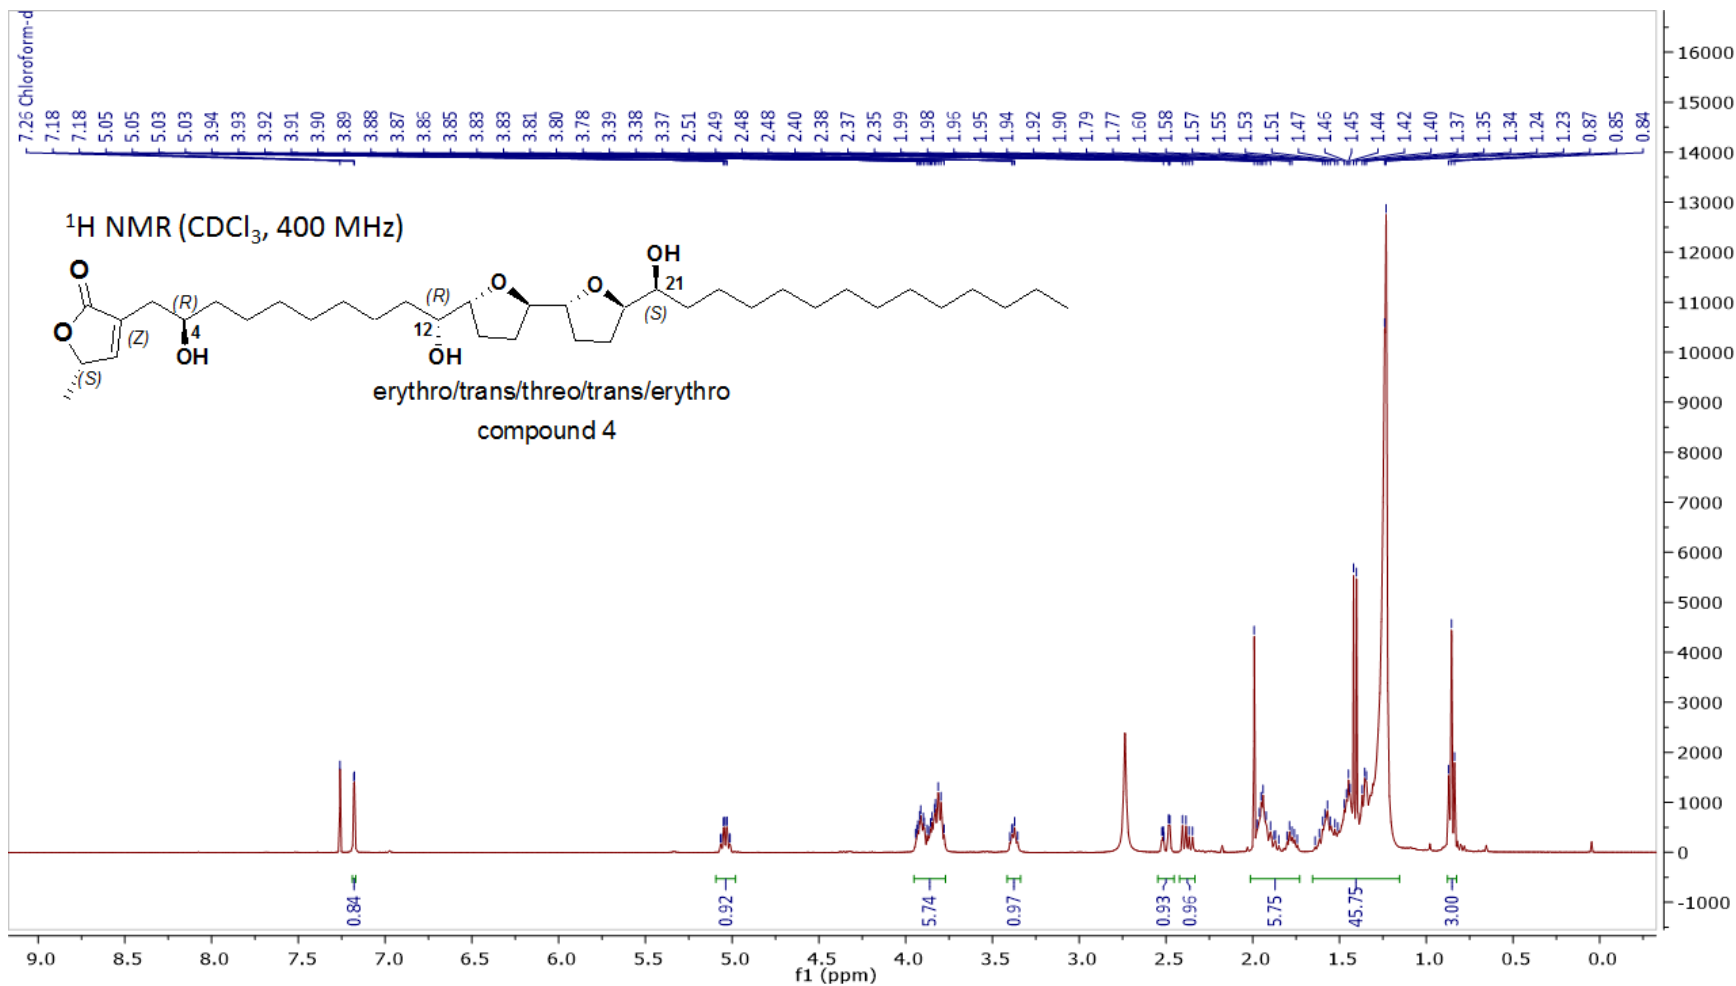

S40 <sup>1</sup>H NMR (400 MHz, CDCl<sub>3</sub>) spectrum of compound 4

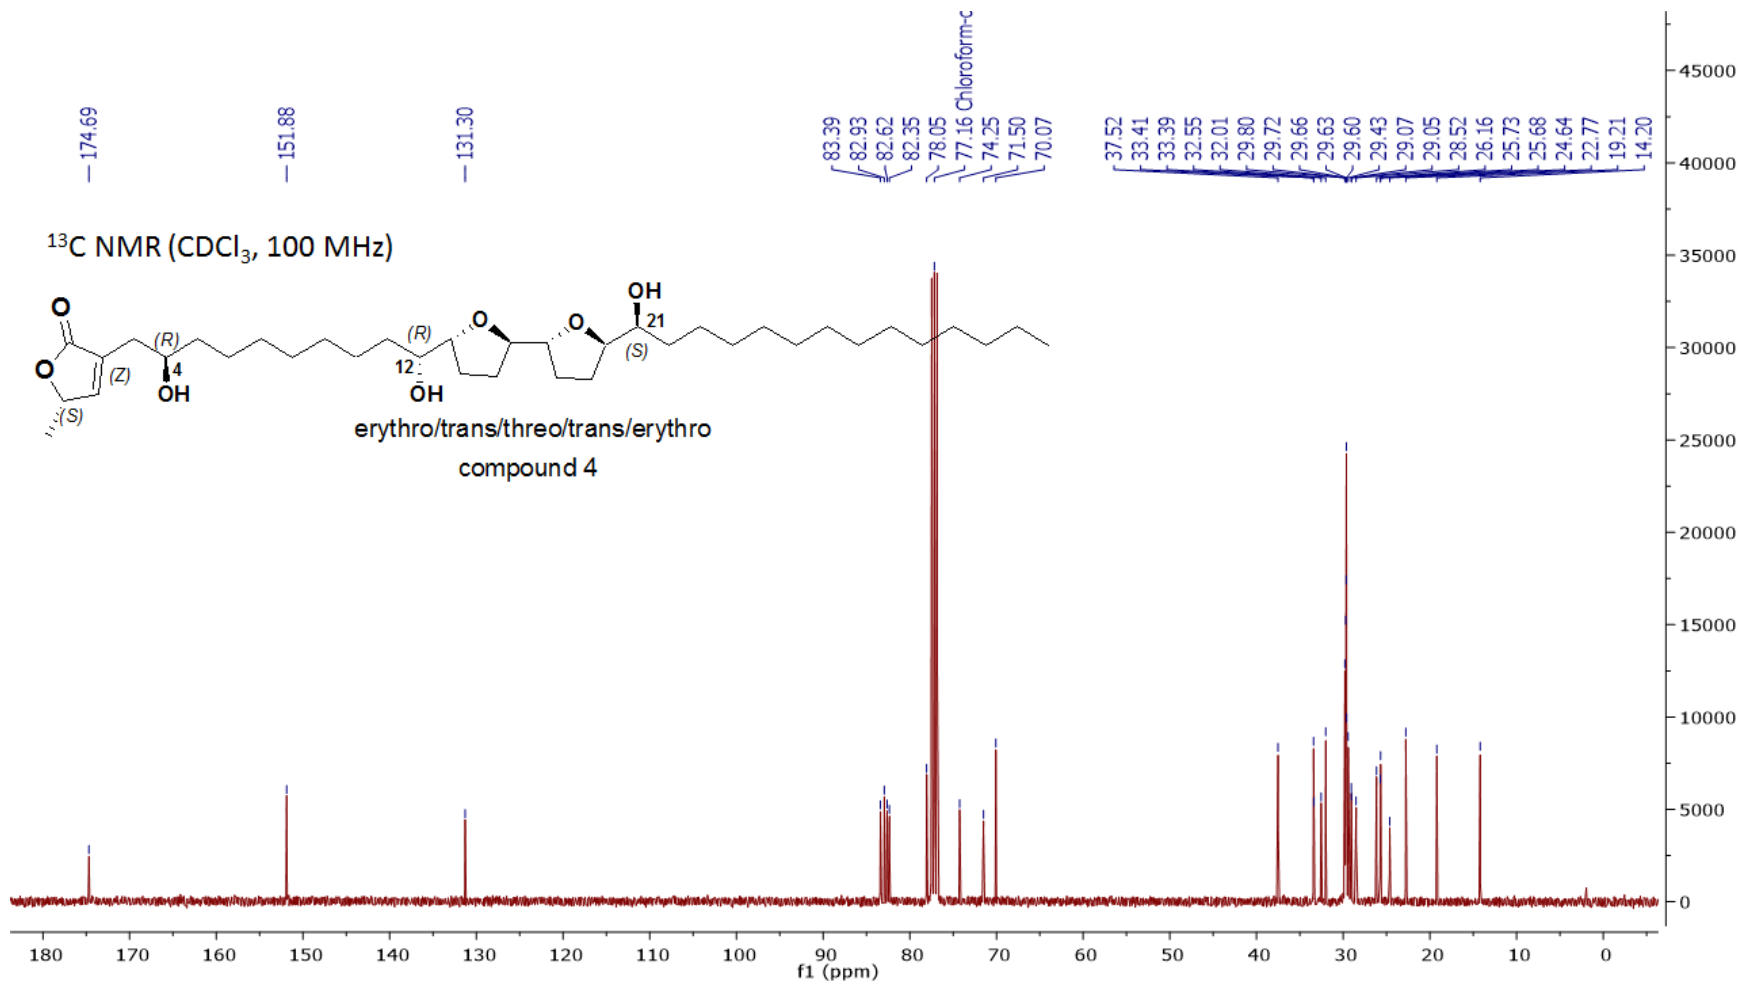

S41 <sup>13</sup>C NMR (100 MHz, CDCl<sub>3</sub>) spectrum of compound 4

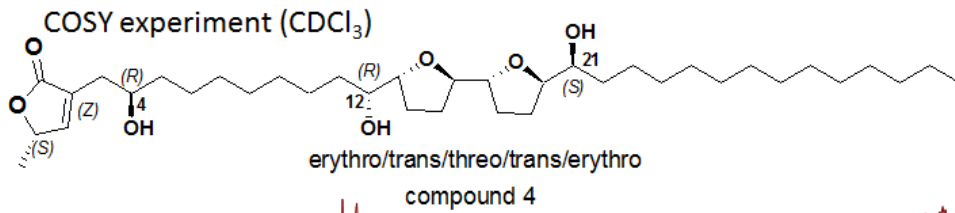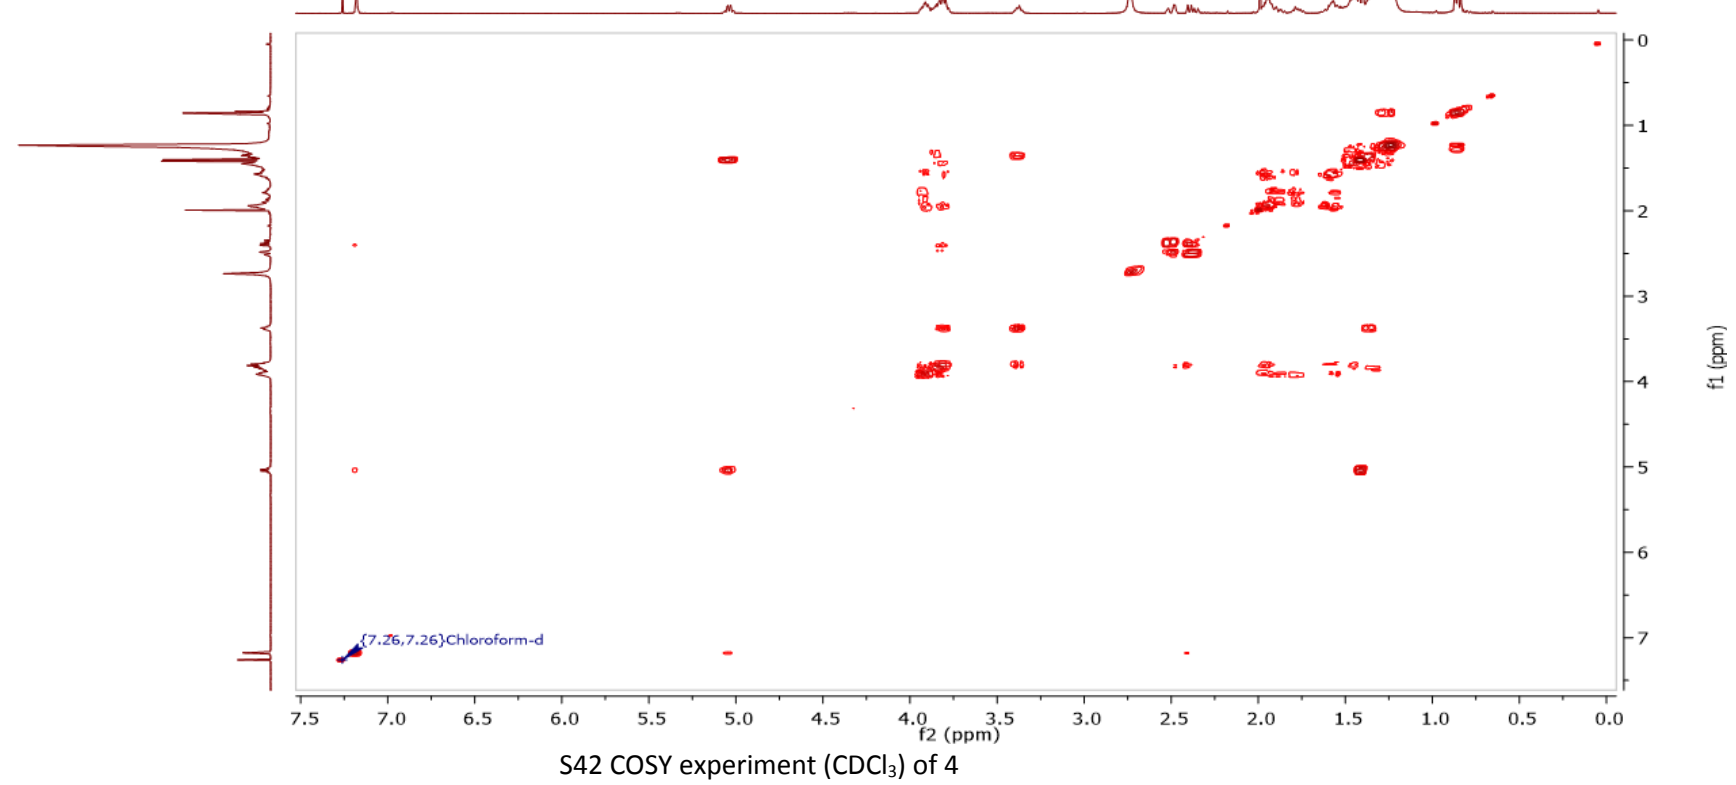

HSQC experiment (CDCl<sub>3</sub>)

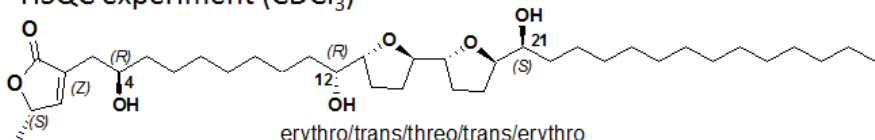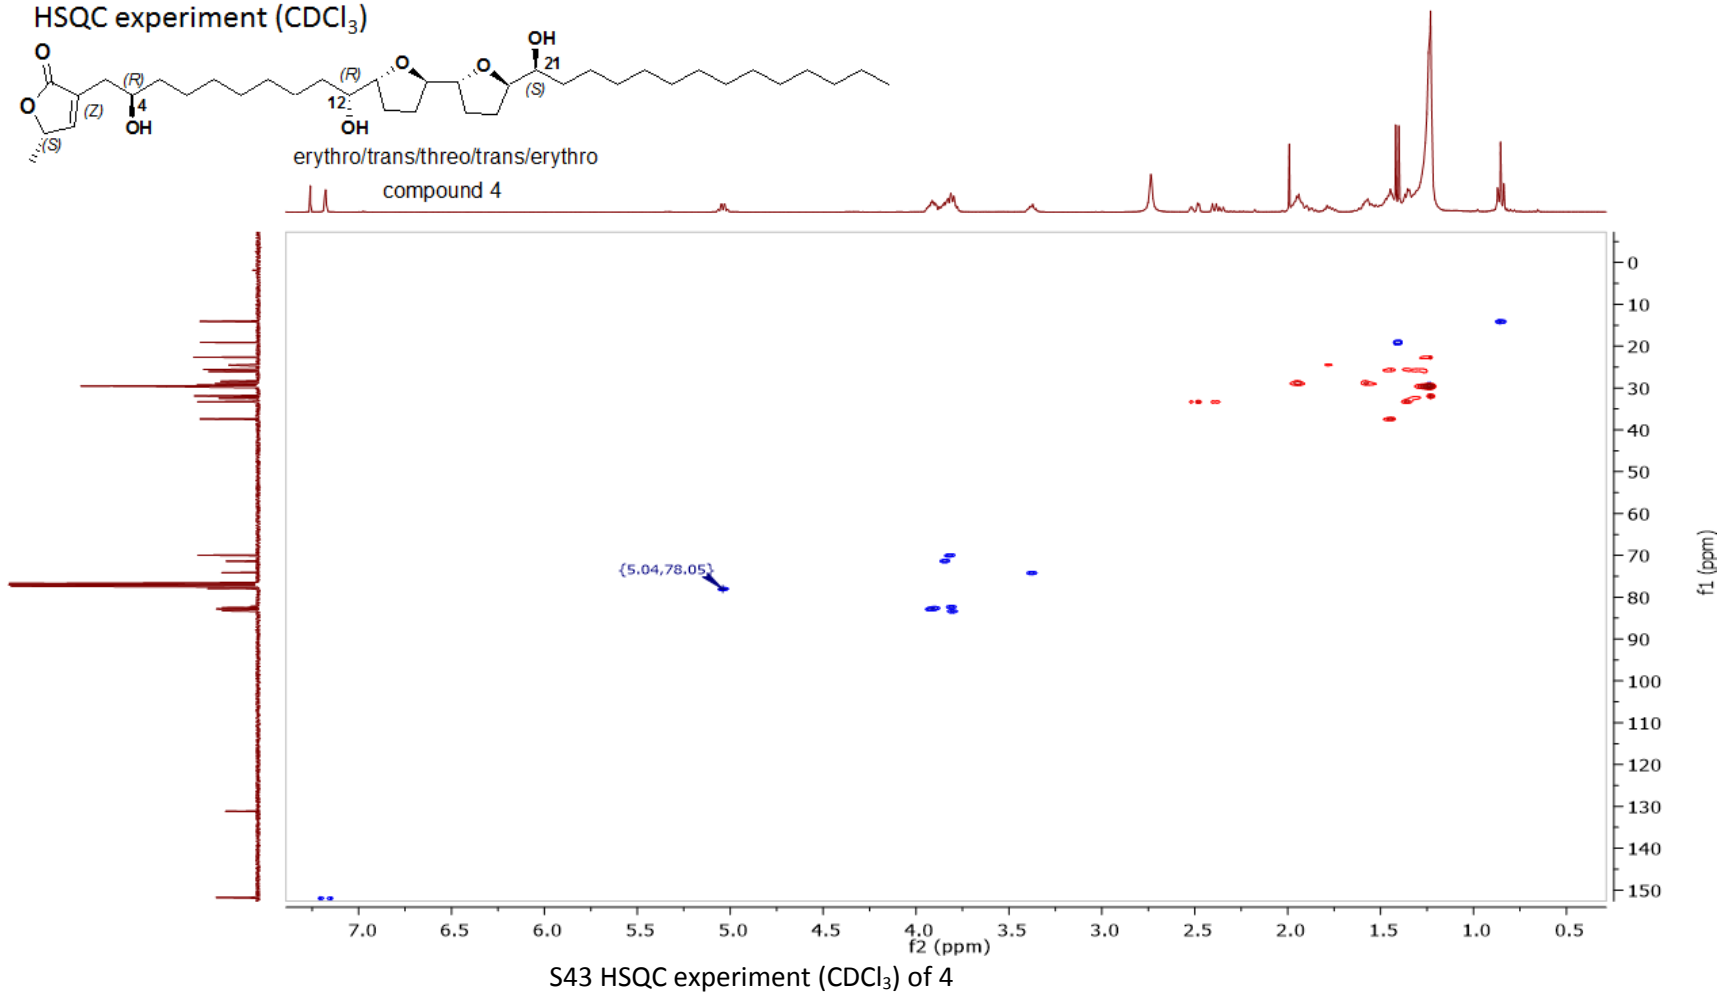

HMBC experiment (CDCl<sub>3</sub>)

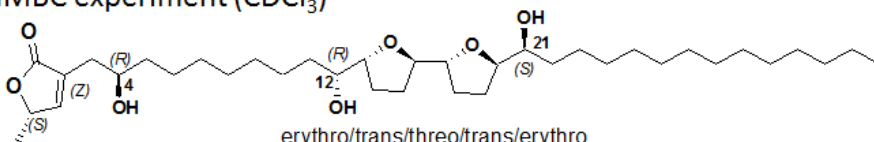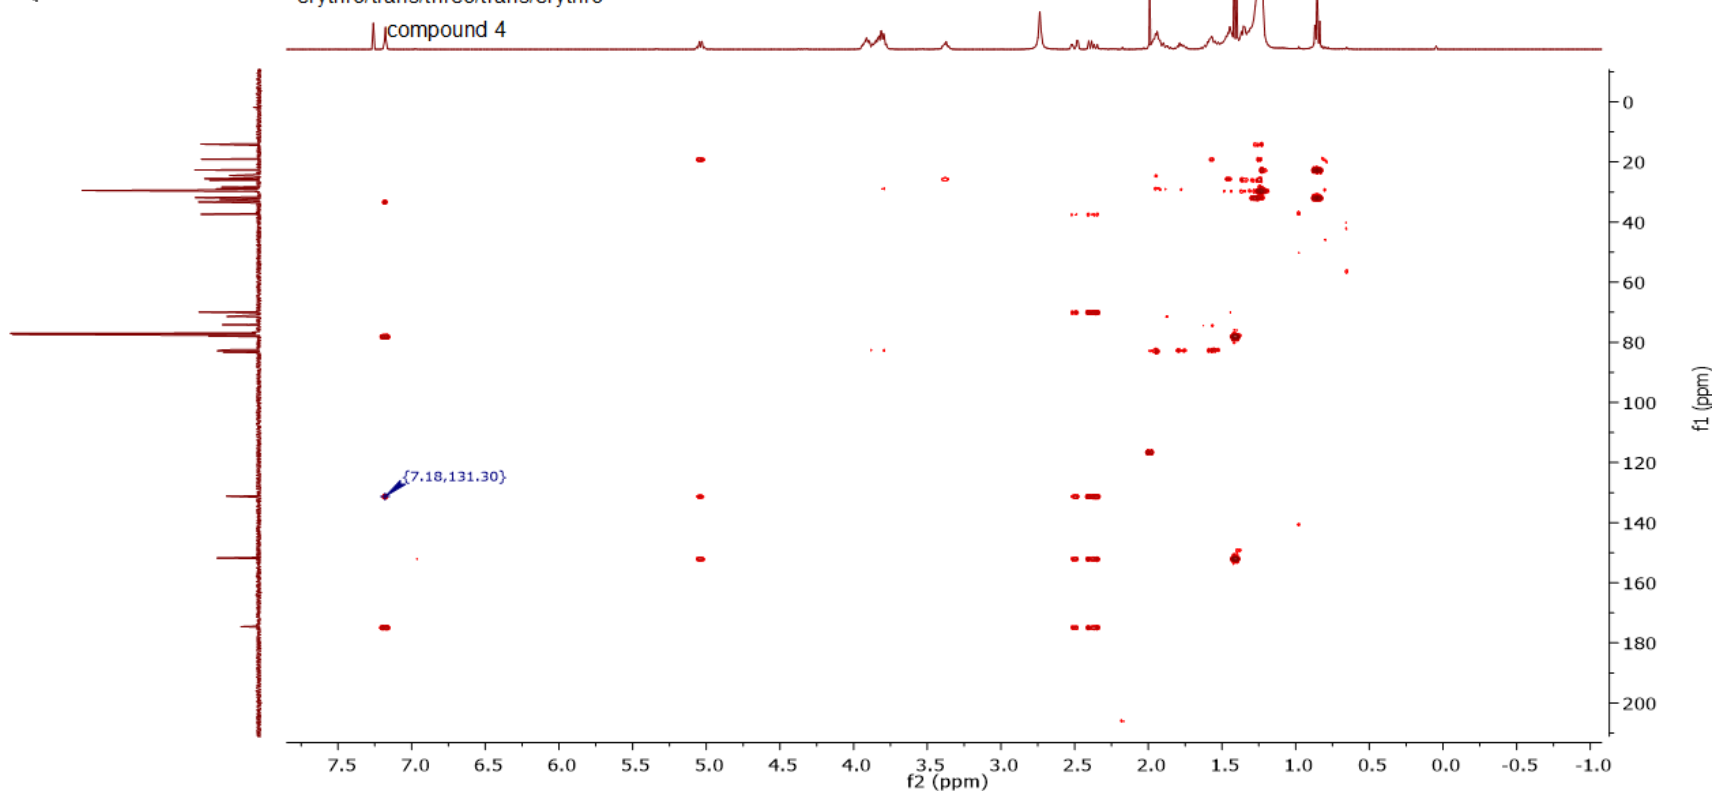

S44 HMBC experiment (CDCl<sub>3</sub>) of 4



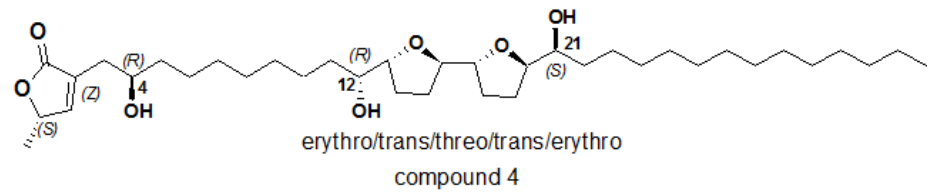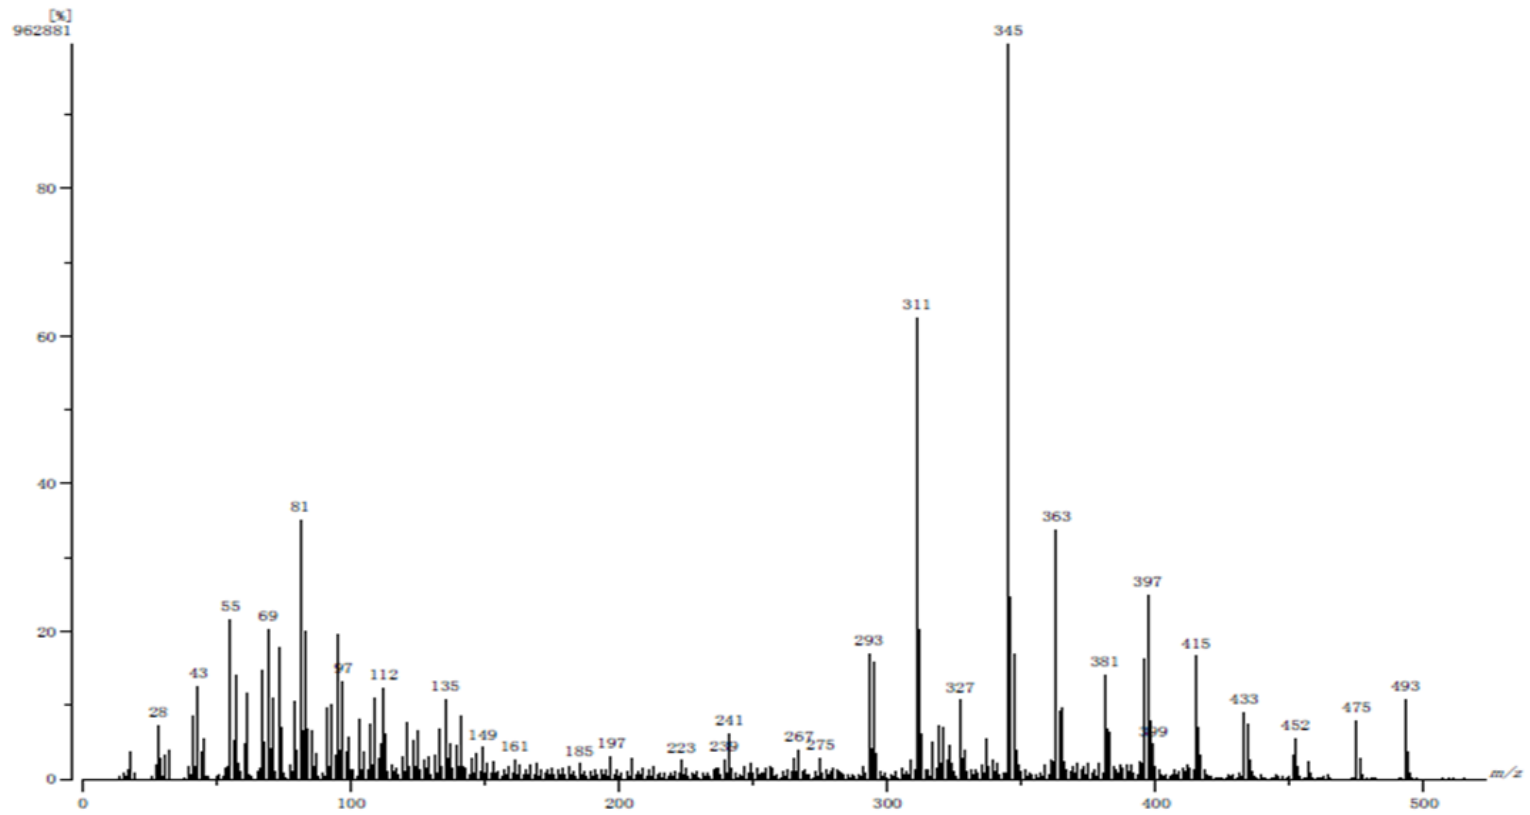

S45 Mass spectrum (IE) of 4

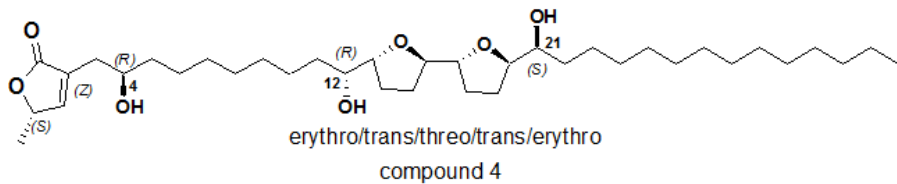

Elemental composition calculator

Target m/z: +645.4706 amu  
 Tolerance: +3.0000 ppm  
 Result type: Elemental  
 Max num of results: 1000  
 Min DBE: -0.5000 Max DBE: +100.0000  
 Electron state: Even  
 Num of charges: 1  
 Add water: N/A  
 Add proton: N/A  
 File Name: J-210618-Ar-1-12-01.wiff

|   | Elements | Min Number | Max Number |
|---|----------|------------|------------|
| 1 | C        | 0          | 50         |
| 2 | H        | 0          | 70         |
| 3 | N        | 0          | 2          |
| 4 | O        | 0          | 10         |
| 5 | Na       | 0          | 2          |

|   | Formula       | Calculated m/z (amu) | mDa Error | PPM Error | DBE |
|---|---------------|----------------------|-----------|-----------|-----|
| 1 | C37 H66 O7 Na | 645.470076           | 0.513759  | 0.795945  | 4.5 |

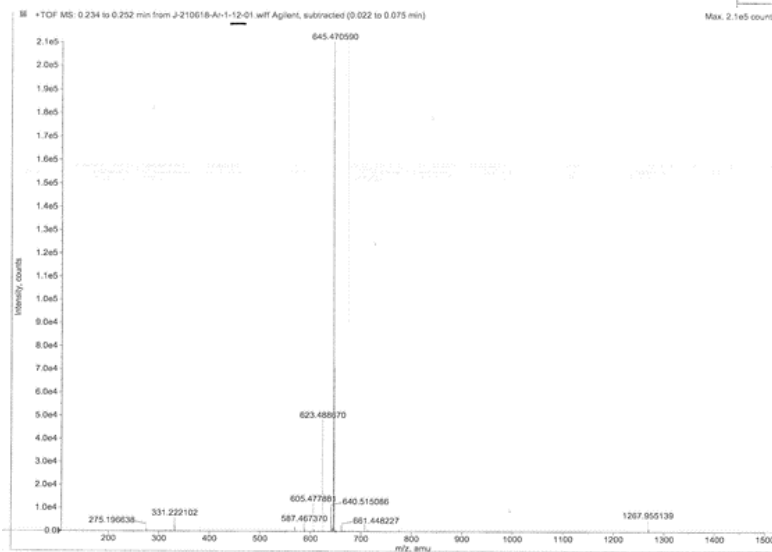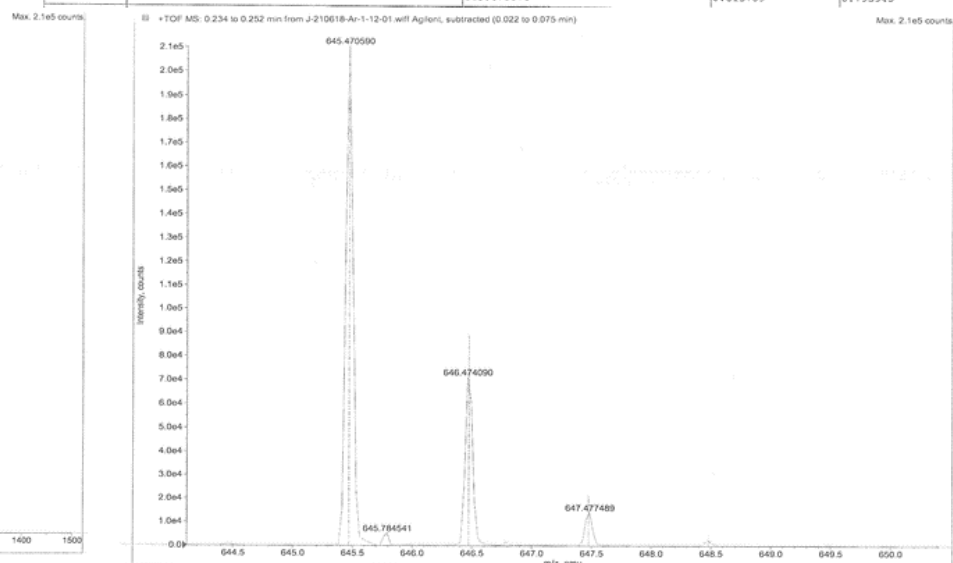

S46 HRMS (ESI-TOF) of compound 4

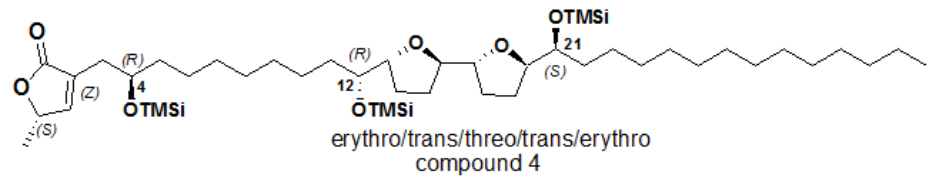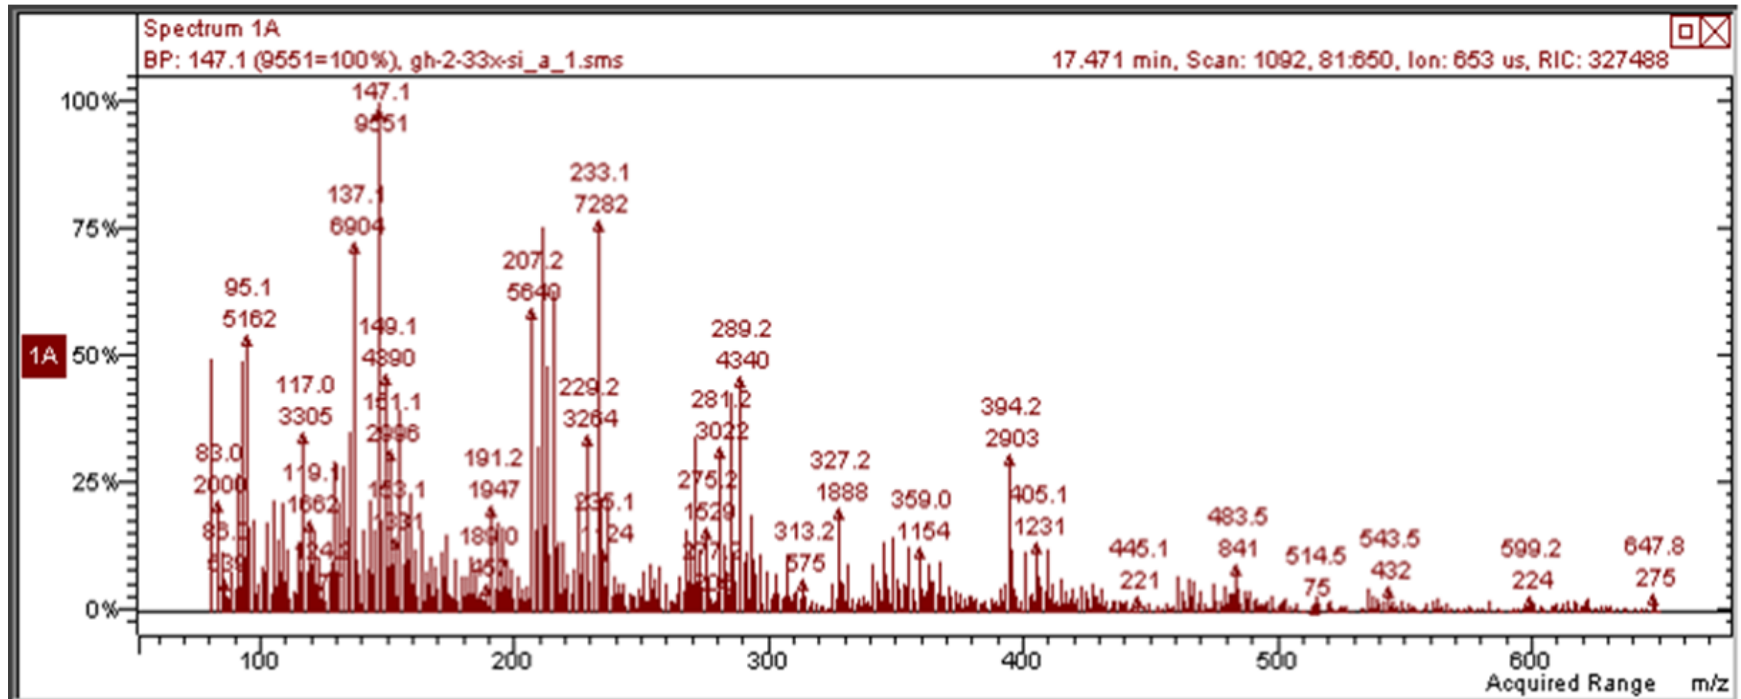

S47 Mass spectrum of the TMSi derivative of 4

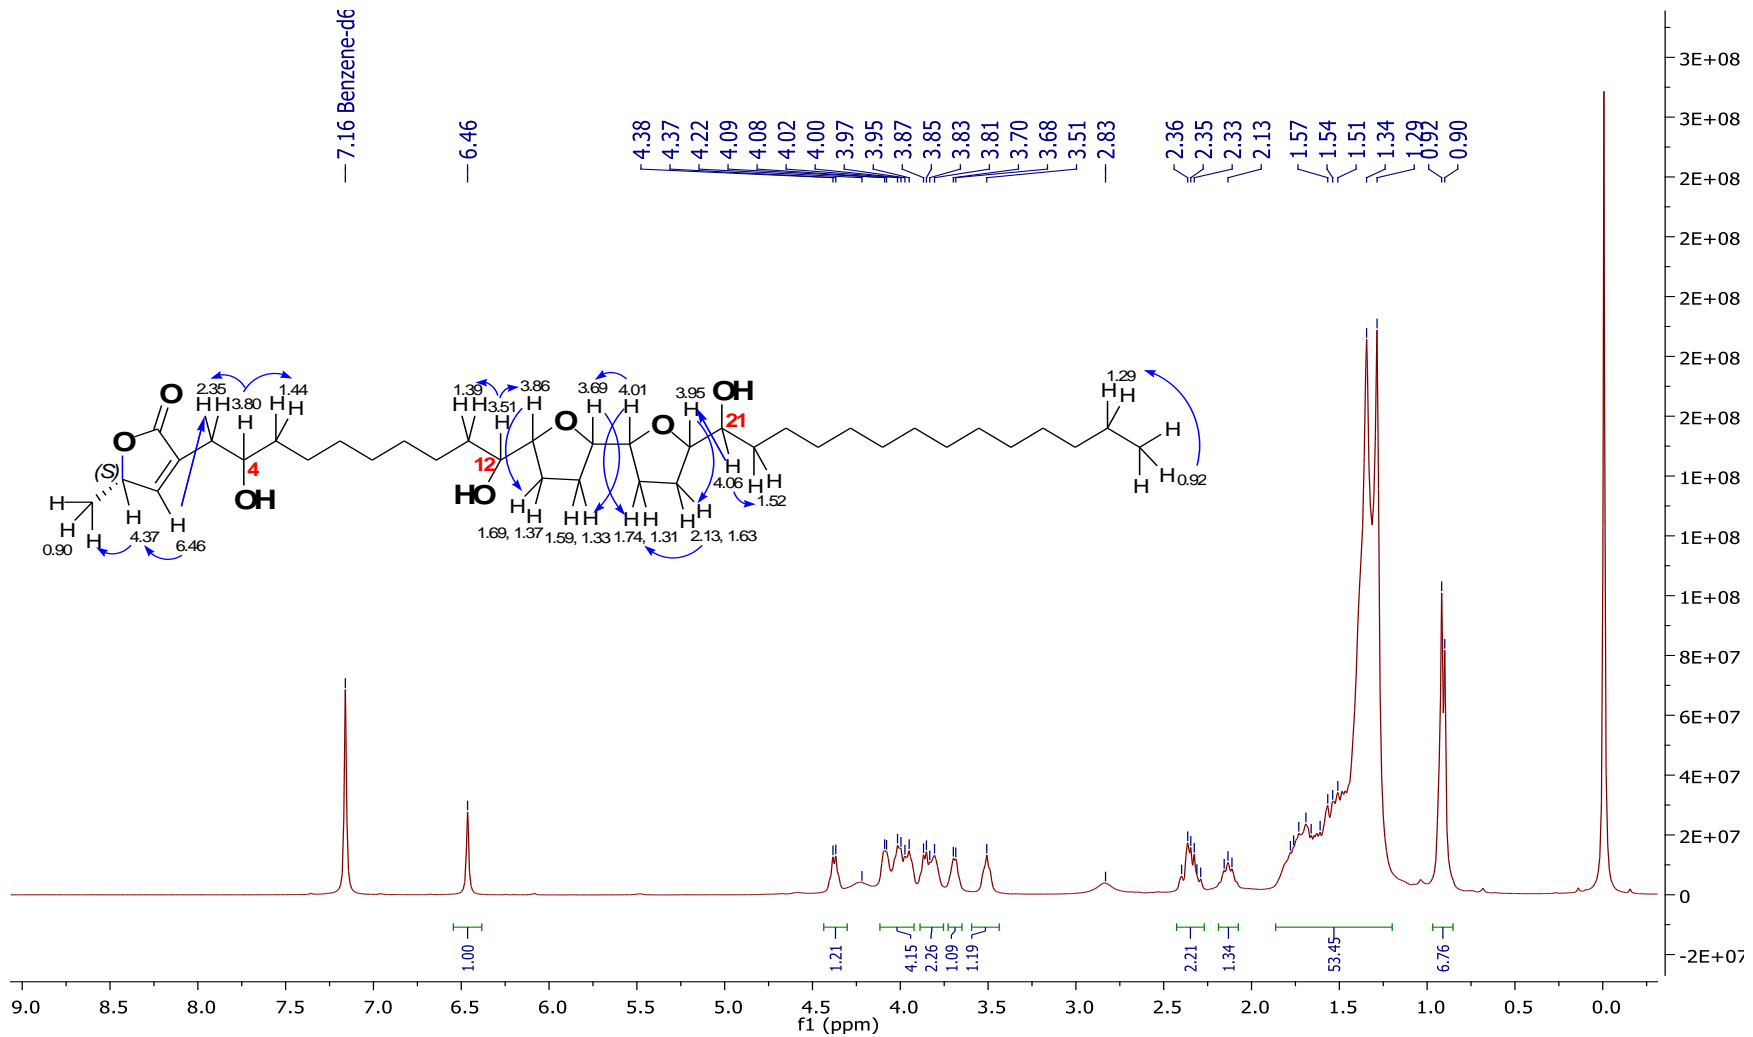

S48 Correlations in COSY and <sup>1</sup>H NMR spectrum (C<sub>6</sub>D<sub>6</sub>) of 4

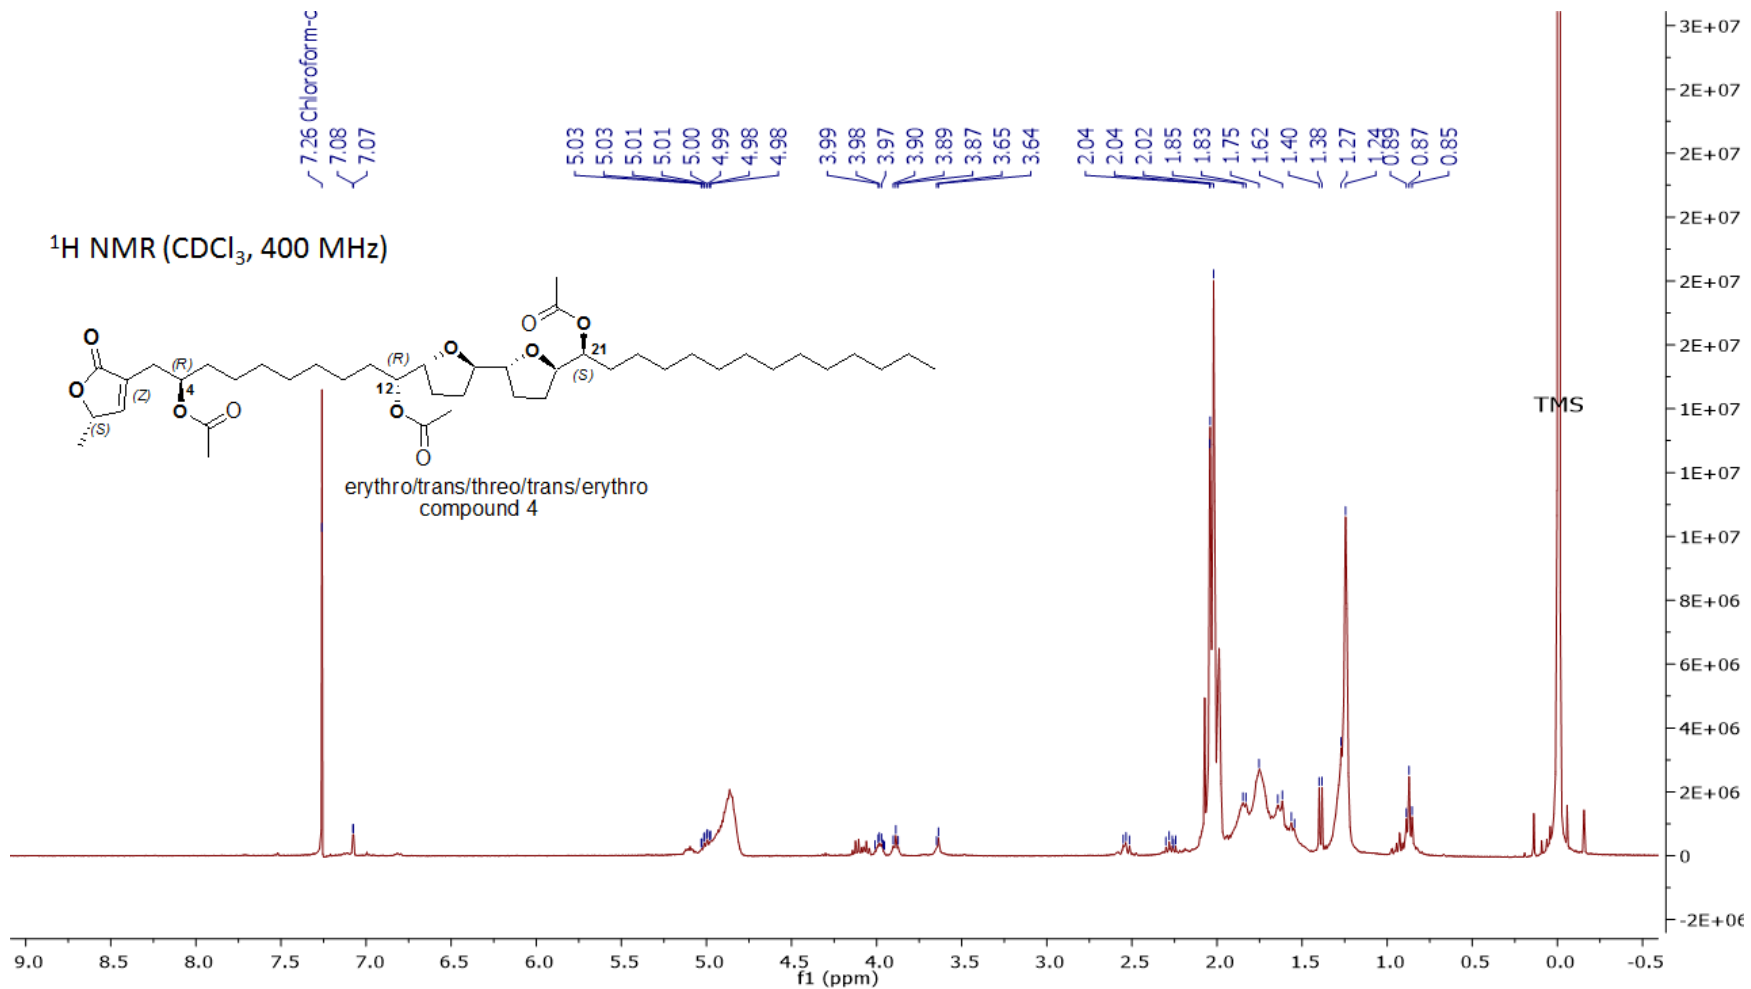

S49 <sup>1</sup>H NMR (400 MHz, CDCl<sub>3</sub>) spectrum of compound 4a

COSY experiment, Mosher ester *R* (CDCl<sub>3</sub>)

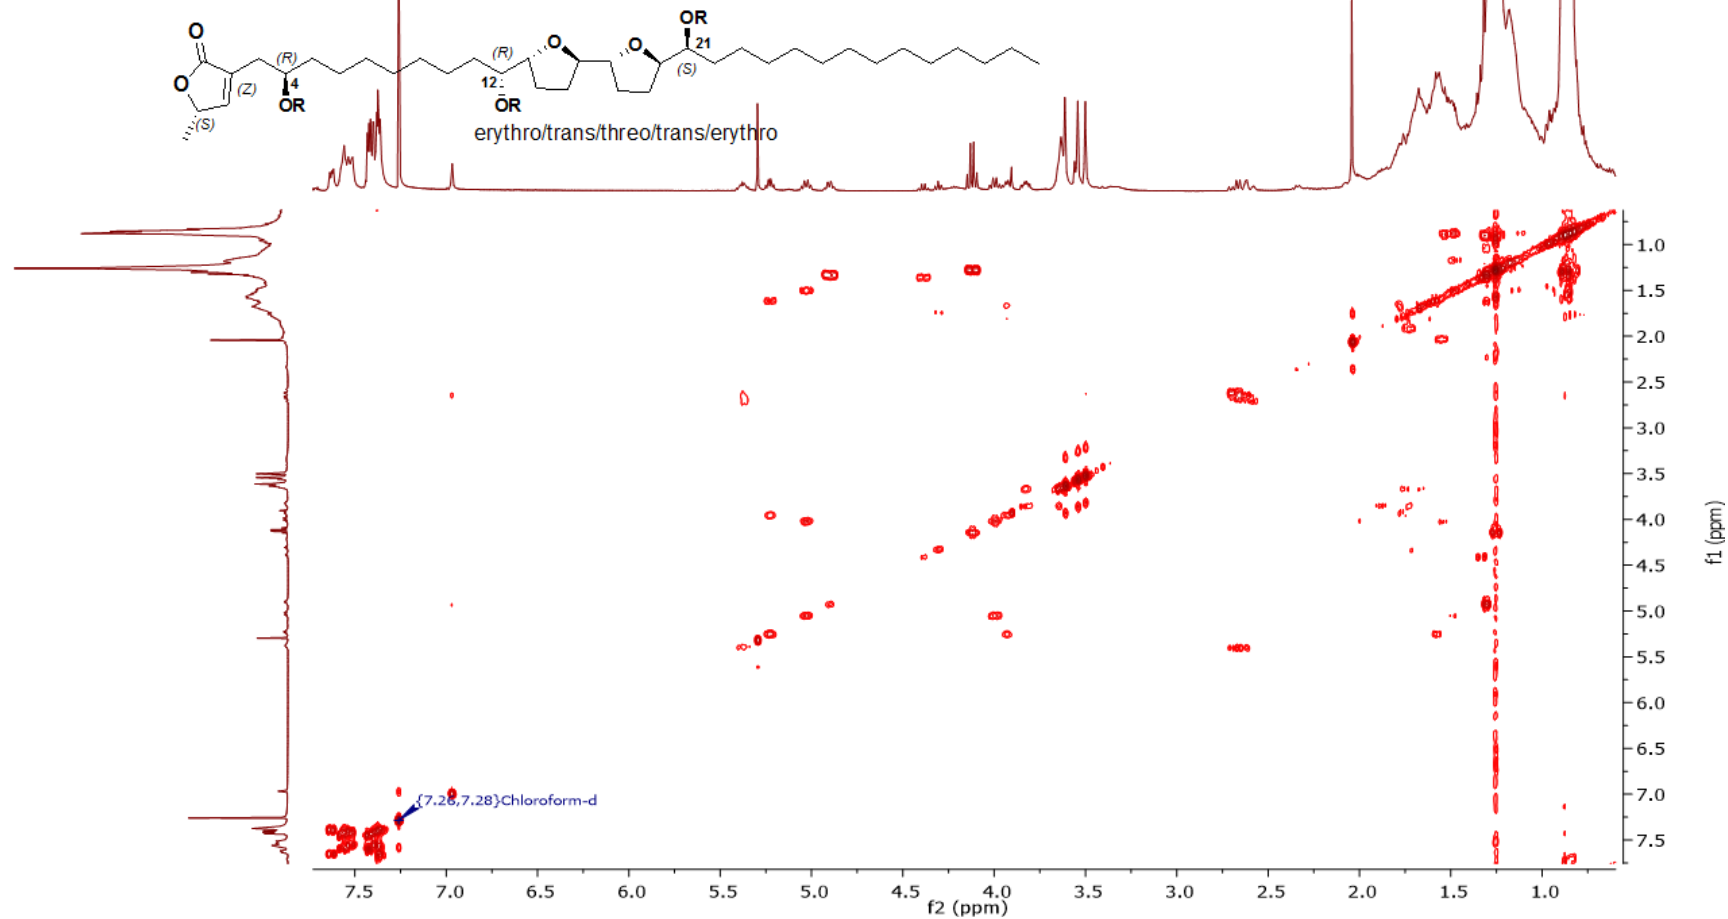

S50 COSY experiment (CDCl<sub>3</sub>), Mosher ester of 4, R= (*R*)-MTPA

COSY experiment, Mosher ester *S* (CDCl<sub>3</sub>)

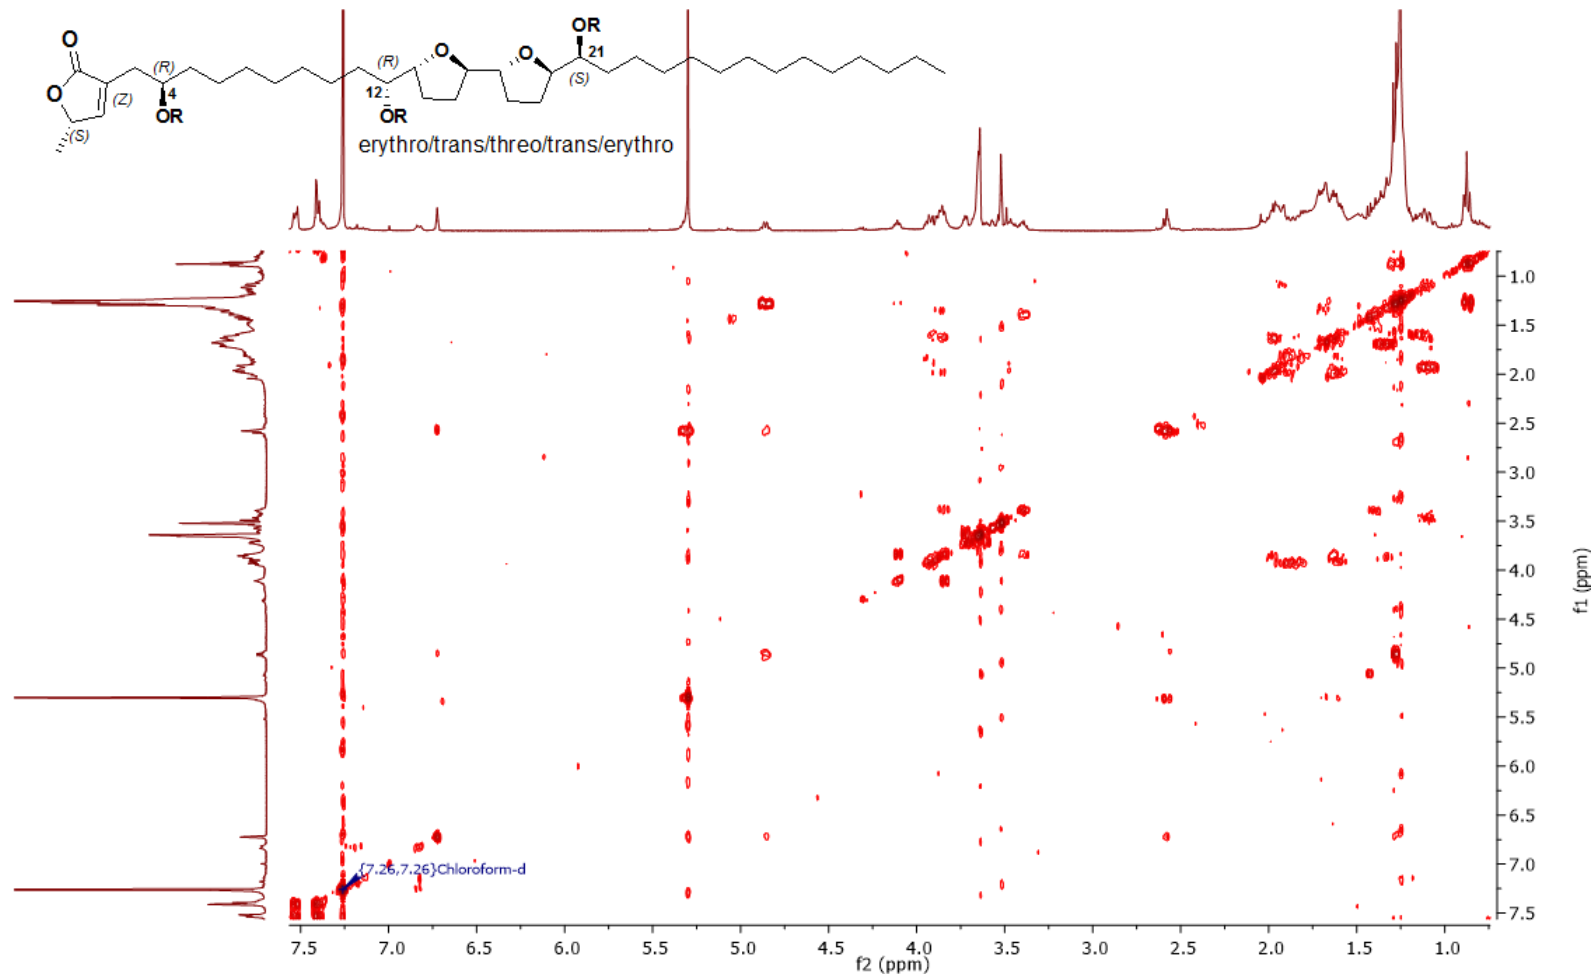

S51 COSY experiment (CDCl<sub>3</sub>), Mosher ester of 4, R= (*S*)-MTPA

| Annopurpuricin D |                                 |                                          |
|------------------|---------------------------------|------------------------------------------|
| Experimental     | 6-311G(d,p)/ B3LYP <sup>a</sup> | 6-311G(d,p)/ $\omega$ B97XD <sup>b</sup> |
| 3416.88          | 3664.88                         | 3773.30                                  |
| 3367.70          | 3662.04                         | 3730.17                                  |
| 2953.01          | 2954.30                         | 2953.75                                  |
| 2917.32          | 2920.79                         | 2920.97                                  |
| 2849.81          | 2857.83                         | 2872.94                                  |
| 1747.50          | 1752.92                         | 1789.45                                  |
| 1652.99          | 1636.44                         | 1675.74                                  |
| 1464.93          | 1460.32                         | 1466.60                                  |
| 1399.35          | 1417.90                         | 1399.07                                  |
| 1374.27          | 1373.76                         | 1376.77                                  |
| 1319.30          | 1318.70                         | 1320.91                                  |
| 1202.61          | 1202.51                         | 1201.12                                  |
| 1118.71          | 1114.02                         | 1111.31                                  |
| 1074.34          | 1074.07                         | 1076.38                                  |
| 1025.16          | 1025.42                         | 1034.49                                  |
| 960.54           | 961.00                          | 961.66                                   |
| 912.32           | 920.32                          | 910.19                                   |
| 857.37           | 862.66                          | 858.16                                   |
| 789.84           | 788.59                          | 787.52                                   |
| 720.41           | 728.20                          | 727.37                                   |
| 630.72           | 632.84                          | 636.38                                   |
| 602.75           | 596.97                          | 600.17                                   |

<sup>a</sup> Scaling factor of 0.9614

<sup>b</sup> Scaling factor of 0.957

S52 IR theoretical calculations of 4



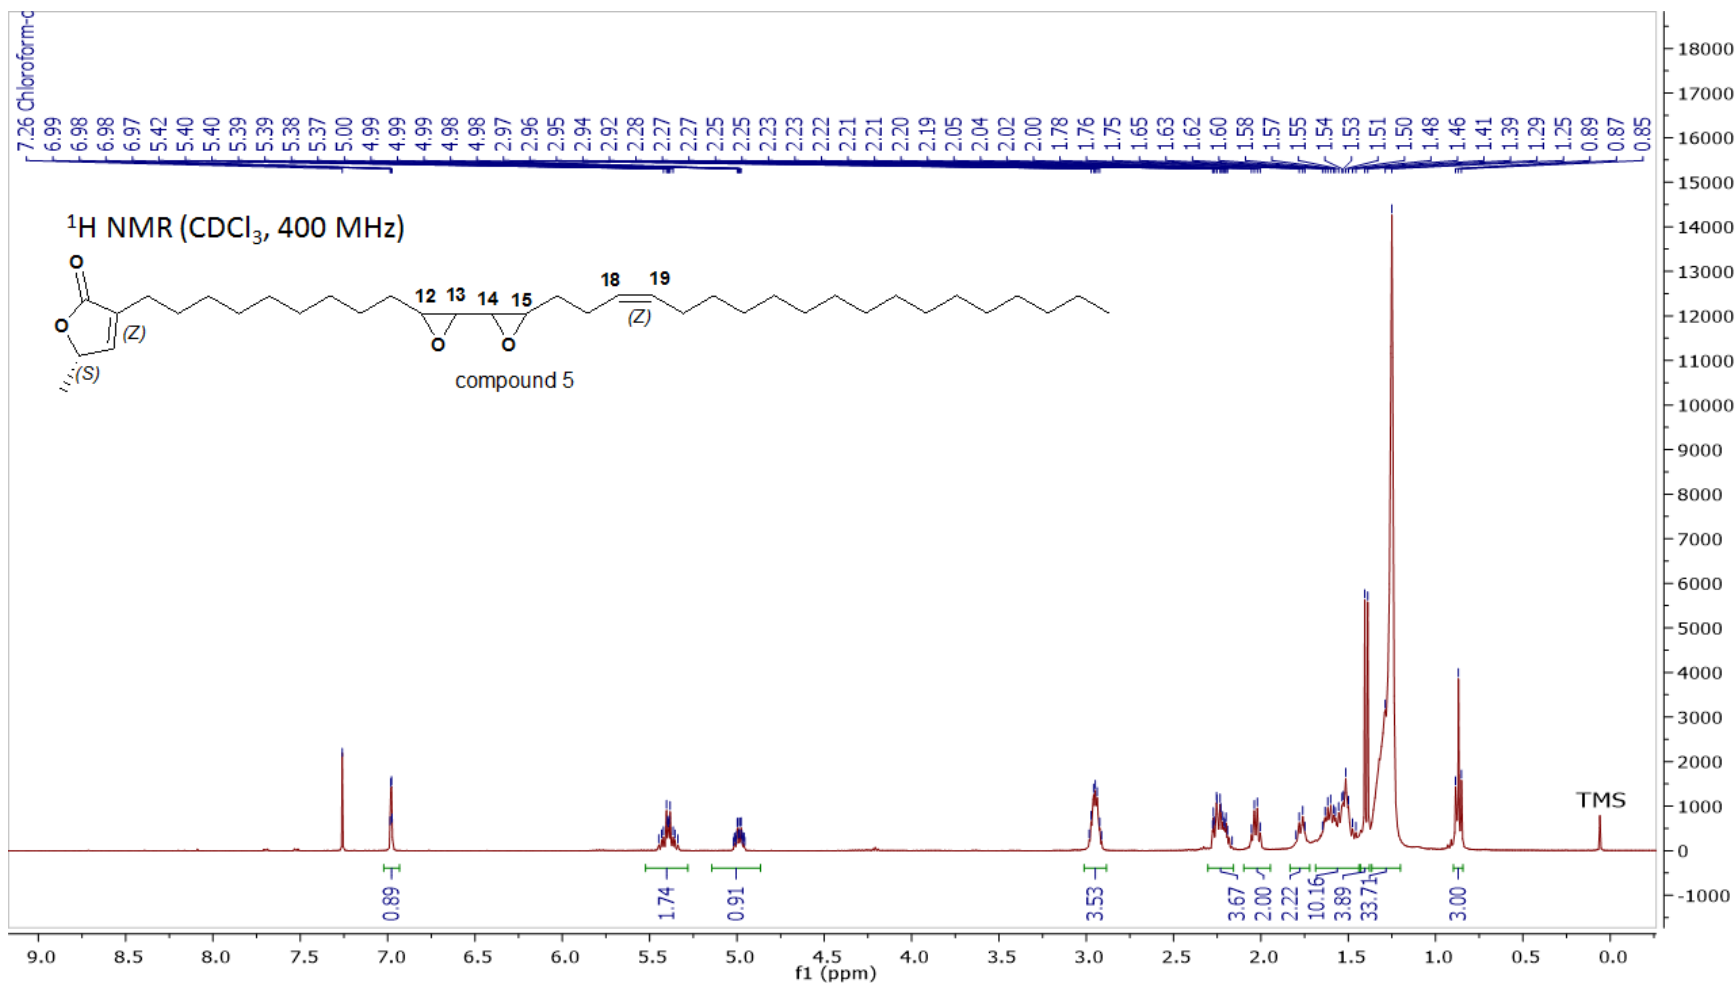

S53 <sup>1</sup>H NMR (400 MHz, CDCl<sub>3</sub>) spectrum of compound 5

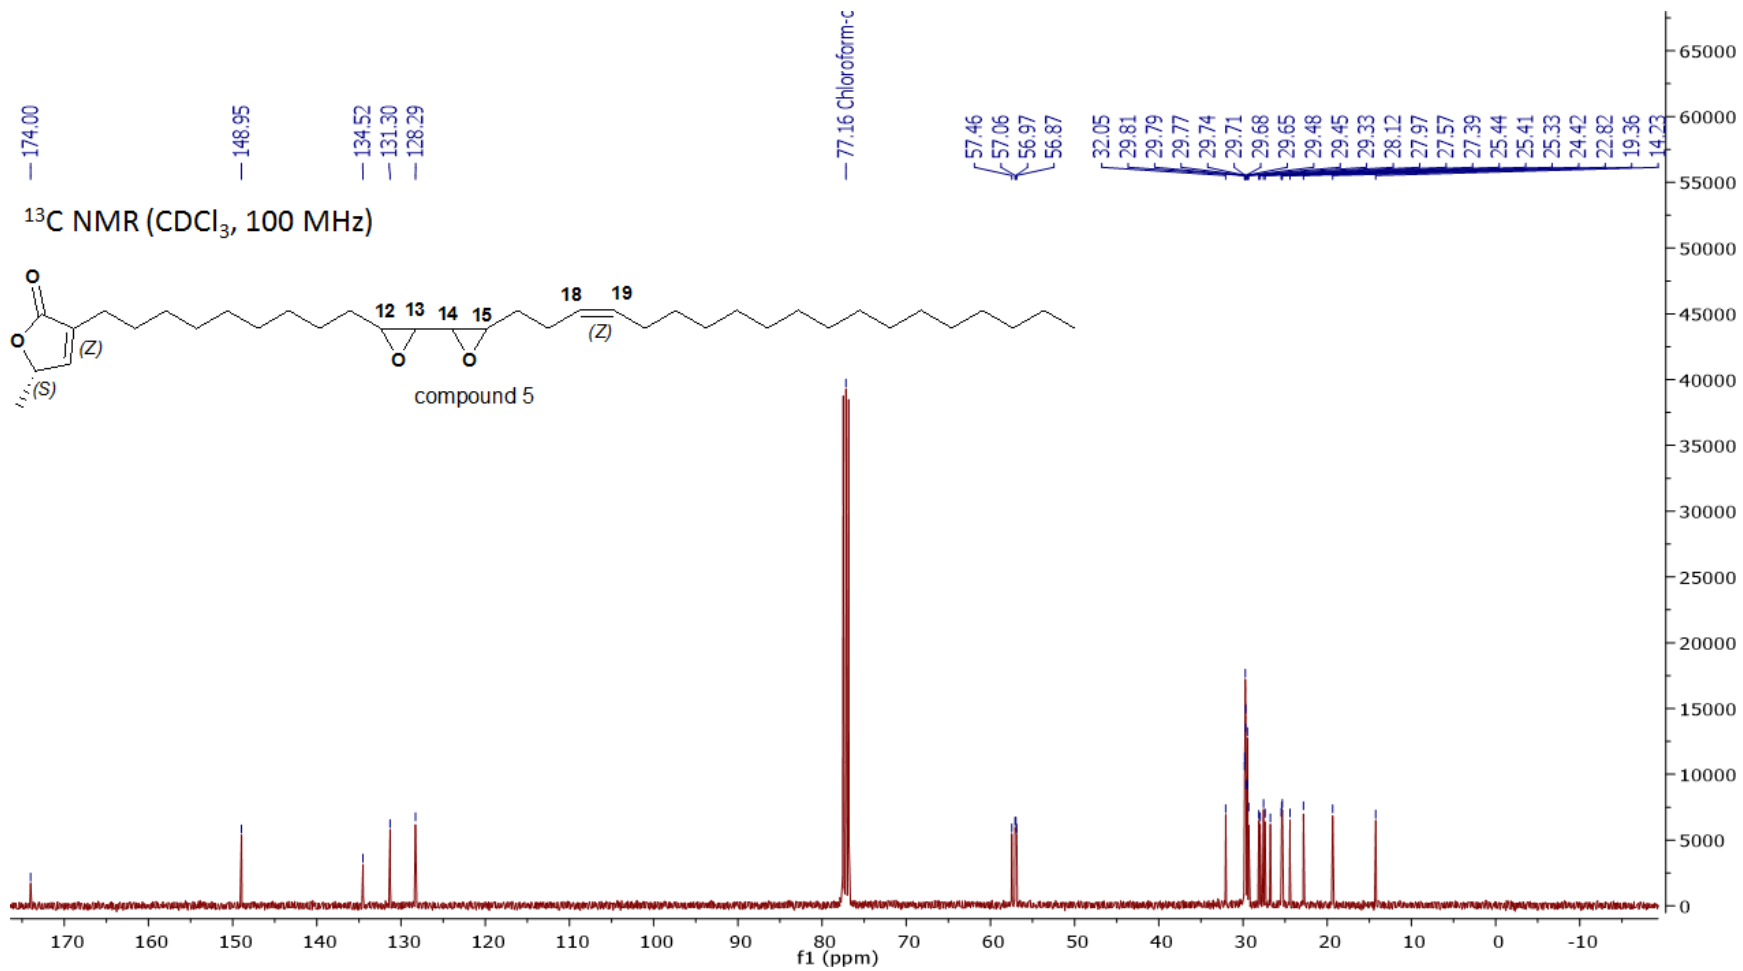

S54 <sup>13</sup>C NMR (100 MHz, CDCl<sub>3</sub>) spectrum of compound 5

COSY experiment (CDCl<sub>3</sub>)

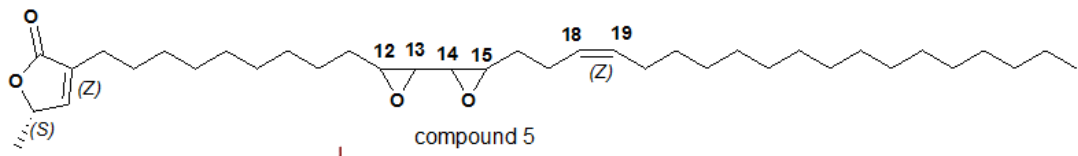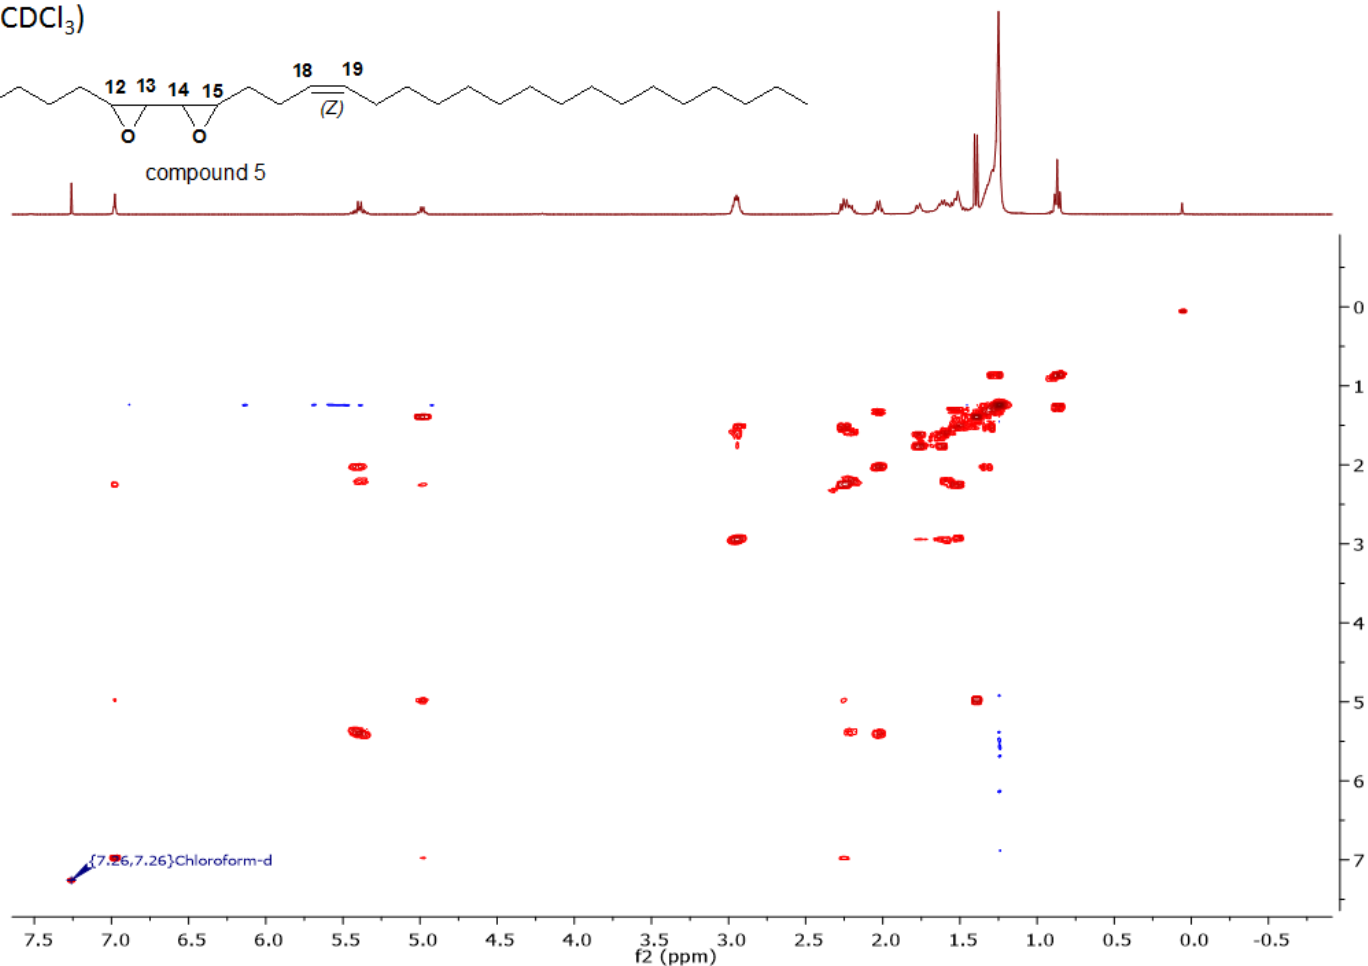

S55 COSY experiment (CDCl<sub>3</sub>) of 5

HSQC experiment (CDCl<sub>3</sub>)

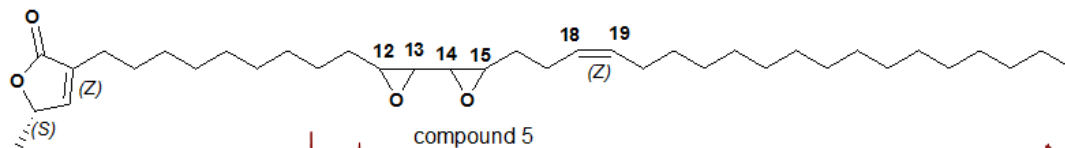

compound 5

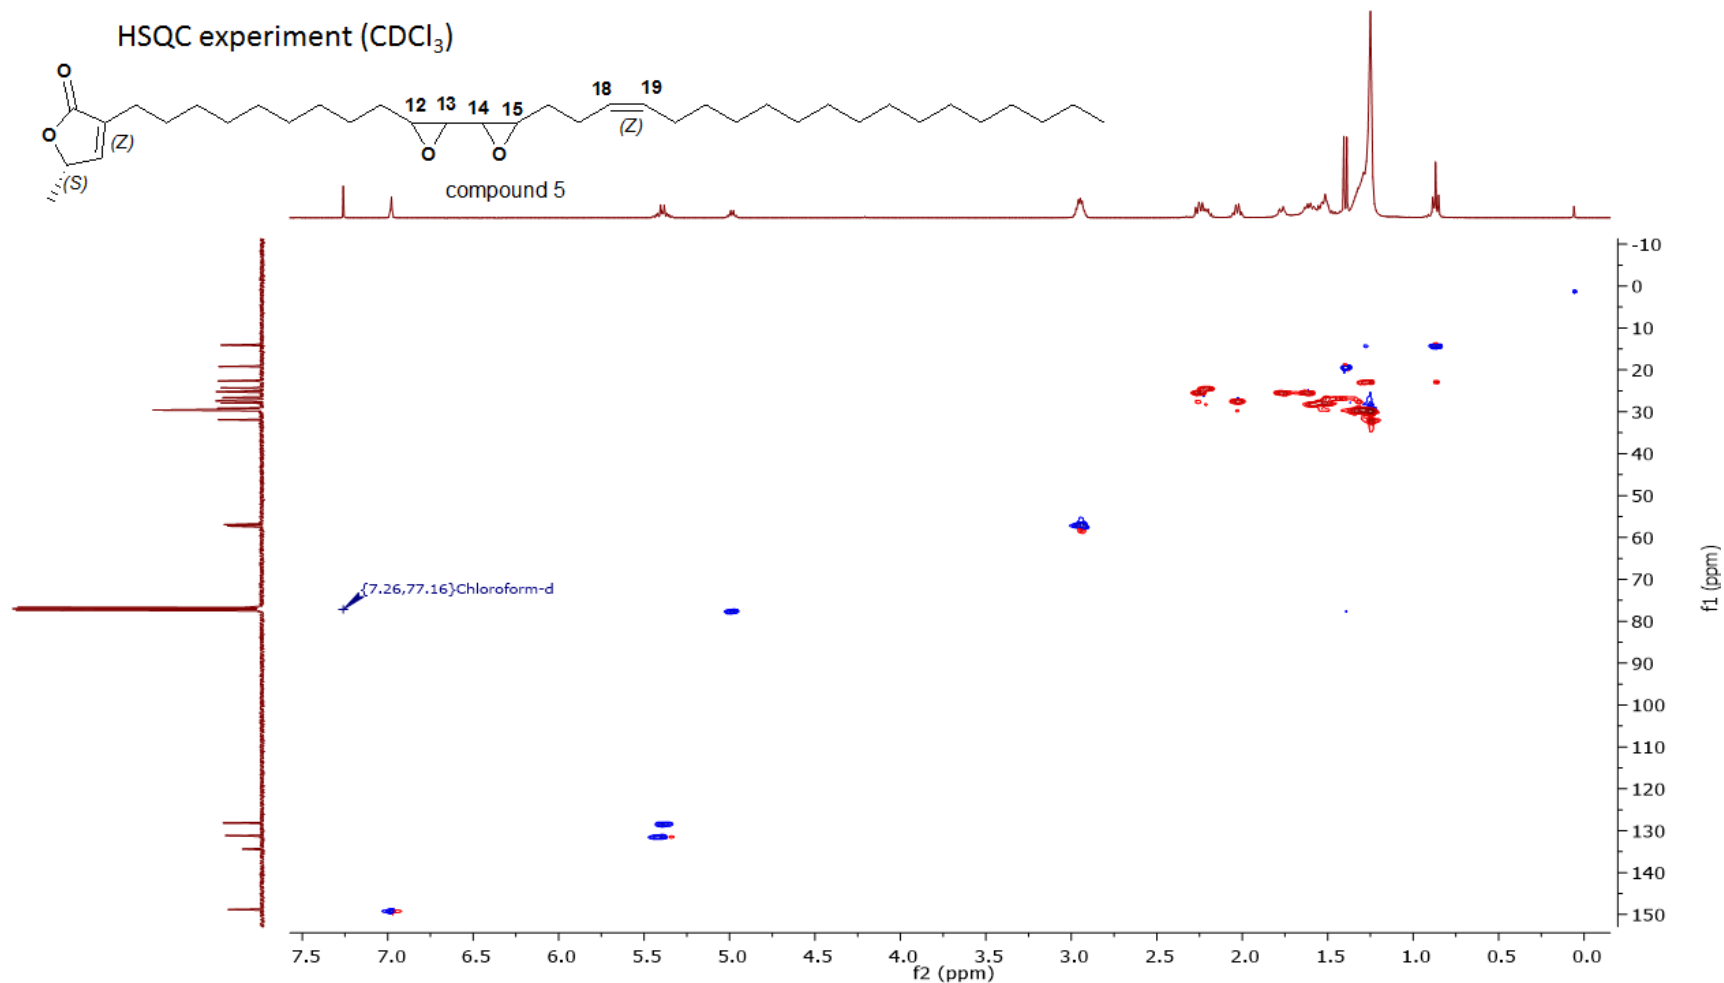

S56 HSQC experiment (CDCl<sub>3</sub>) of 5

HMBC experiment (CDCl<sub>3</sub>)

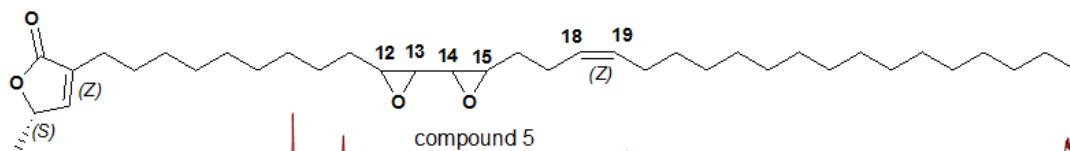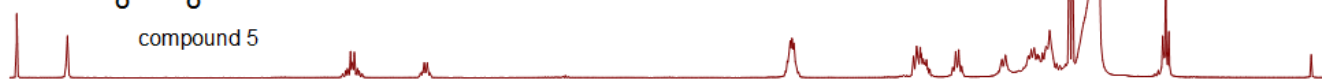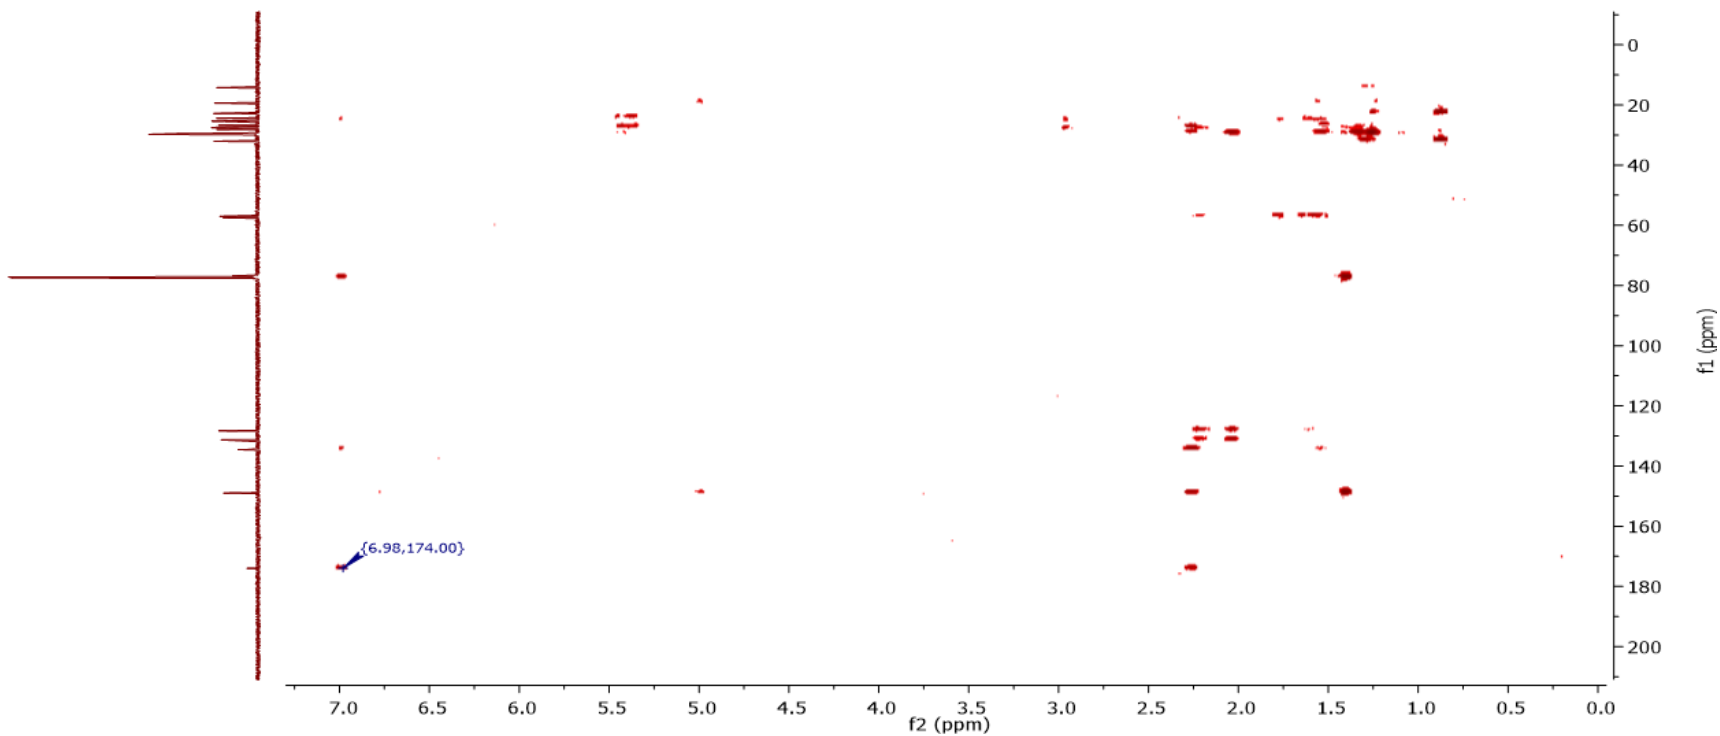

S57 HMBC experiment (CDCl<sub>3</sub>) of 5

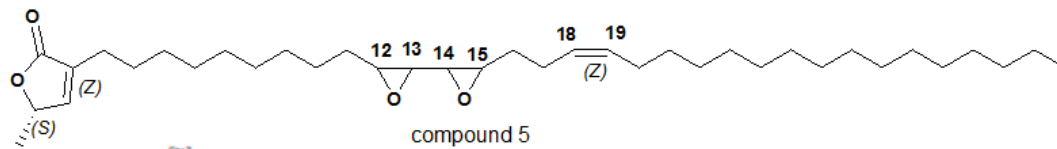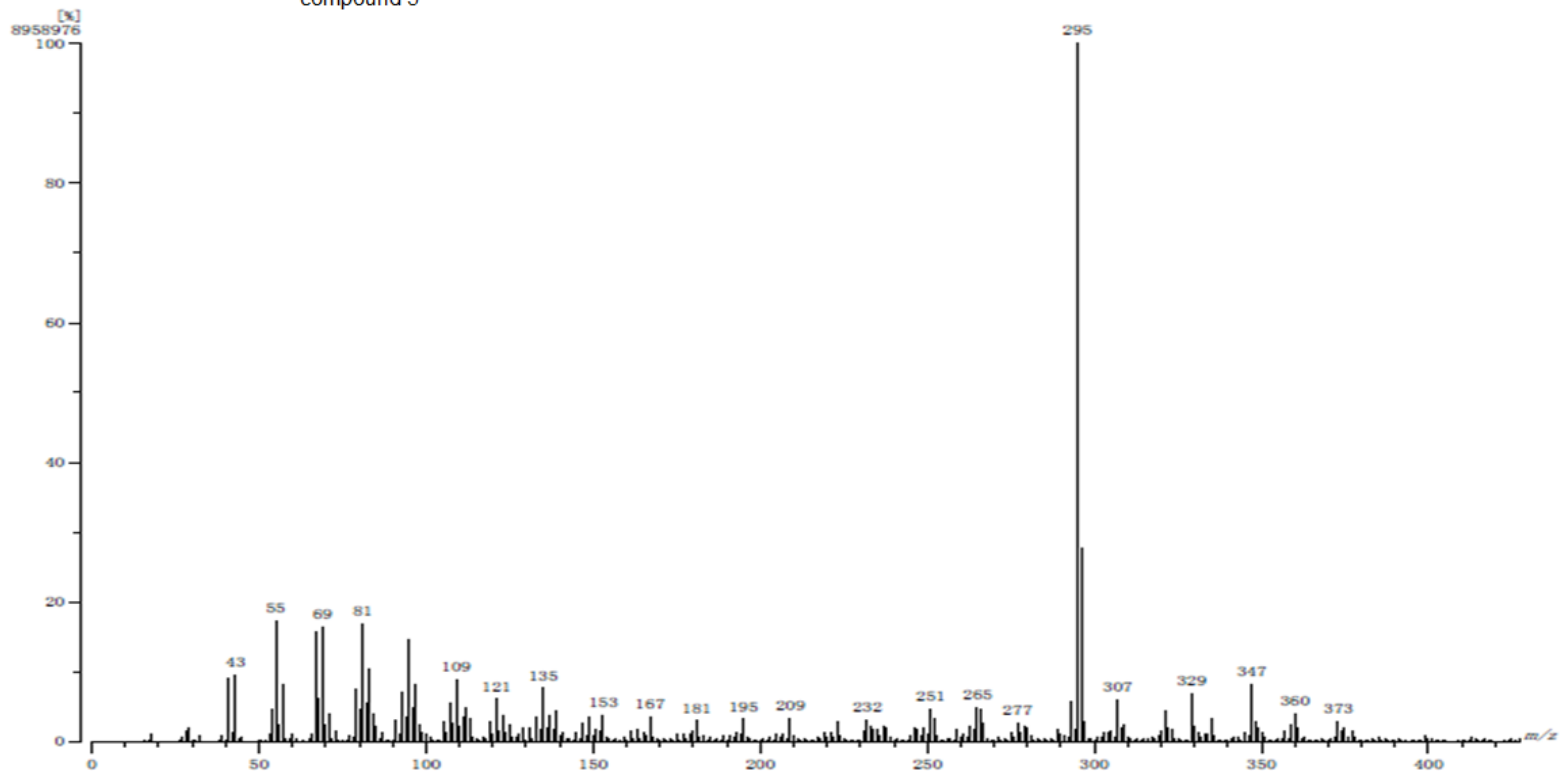

S58 Mass spectrum (IE) of 5

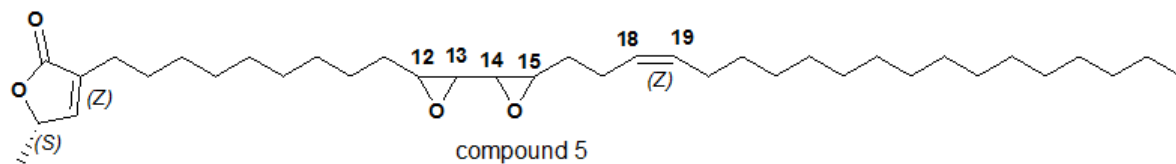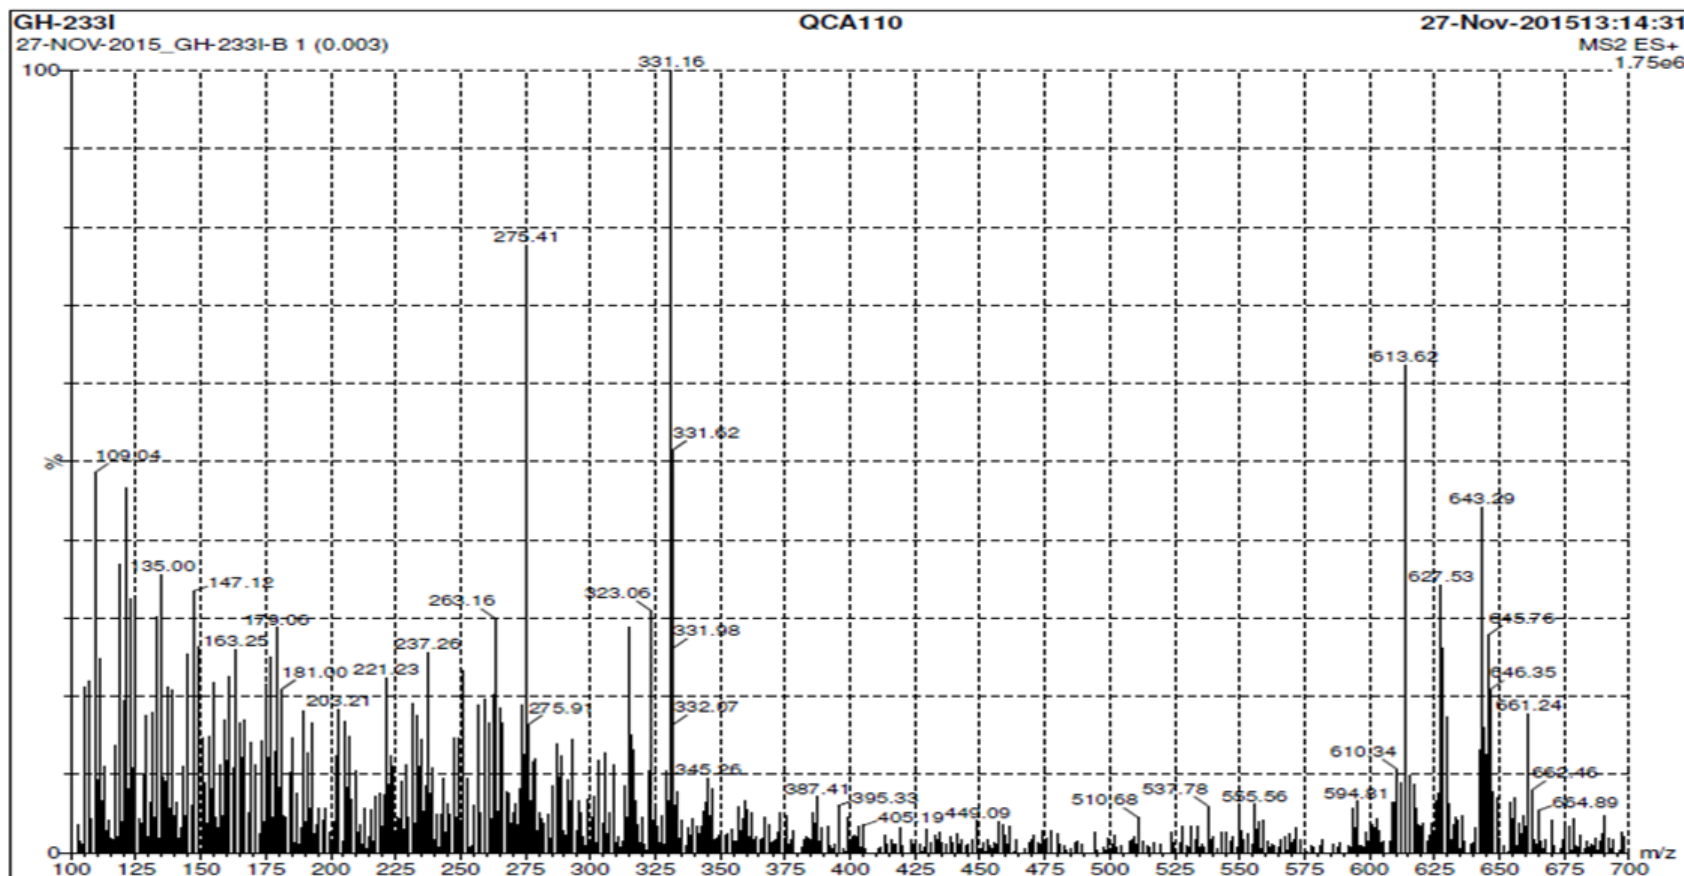

S59 Mass spectrum (ESI+) of 5

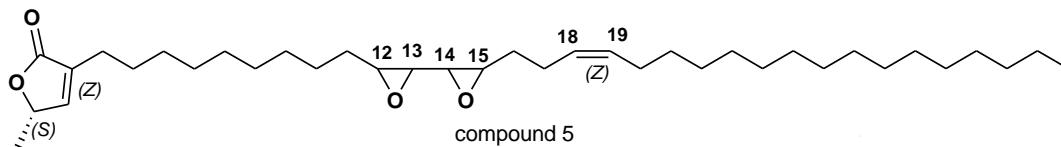

Elemental composition calculator

Target m/z: +595.4693 amu  
 Tolerance: +3.0000 ppm  
 Result type: Elemental  
 Max num of results: 1000  
 Min DBE: -0.5000 Max DBE: +100.0000  
 Electron state: Even  
 Num of charges: 1  
 Add water: N/A  
 Add proton: N/A  
 File Name: J-210618-Ar-1-13-01.wiff

|   | Elements | Min Number | Max Number |
|---|----------|------------|------------|
| 1 | C        | 0          | 50         |
| 2 | H        | 0          | 70         |
| 3 | N        | 0          | 5          |
| 4 | O        | 0          | 5          |
| 5 | Na       | 0          | 2          |

|   | Formula       | Calculated m/z (amu) | mDa Error | PPM Error | DBE |
|---|---------------|----------------------|-----------|-----------|-----|
| 1 | C37 H64 O4 Na | 595.469682           | -0.416240 | -0.699011 | 5.5 |

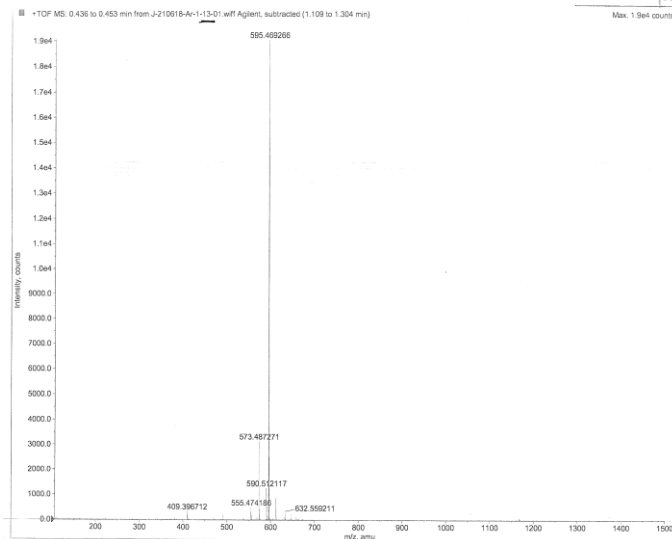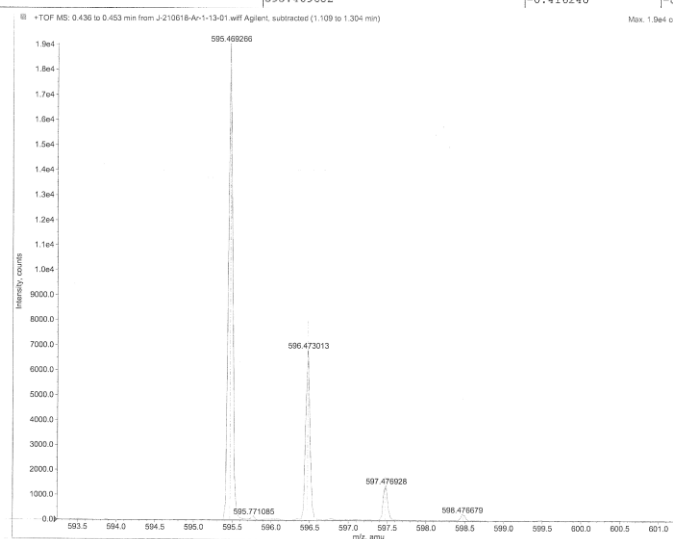

S60 HRMS (ESI-TOF) of compound 5



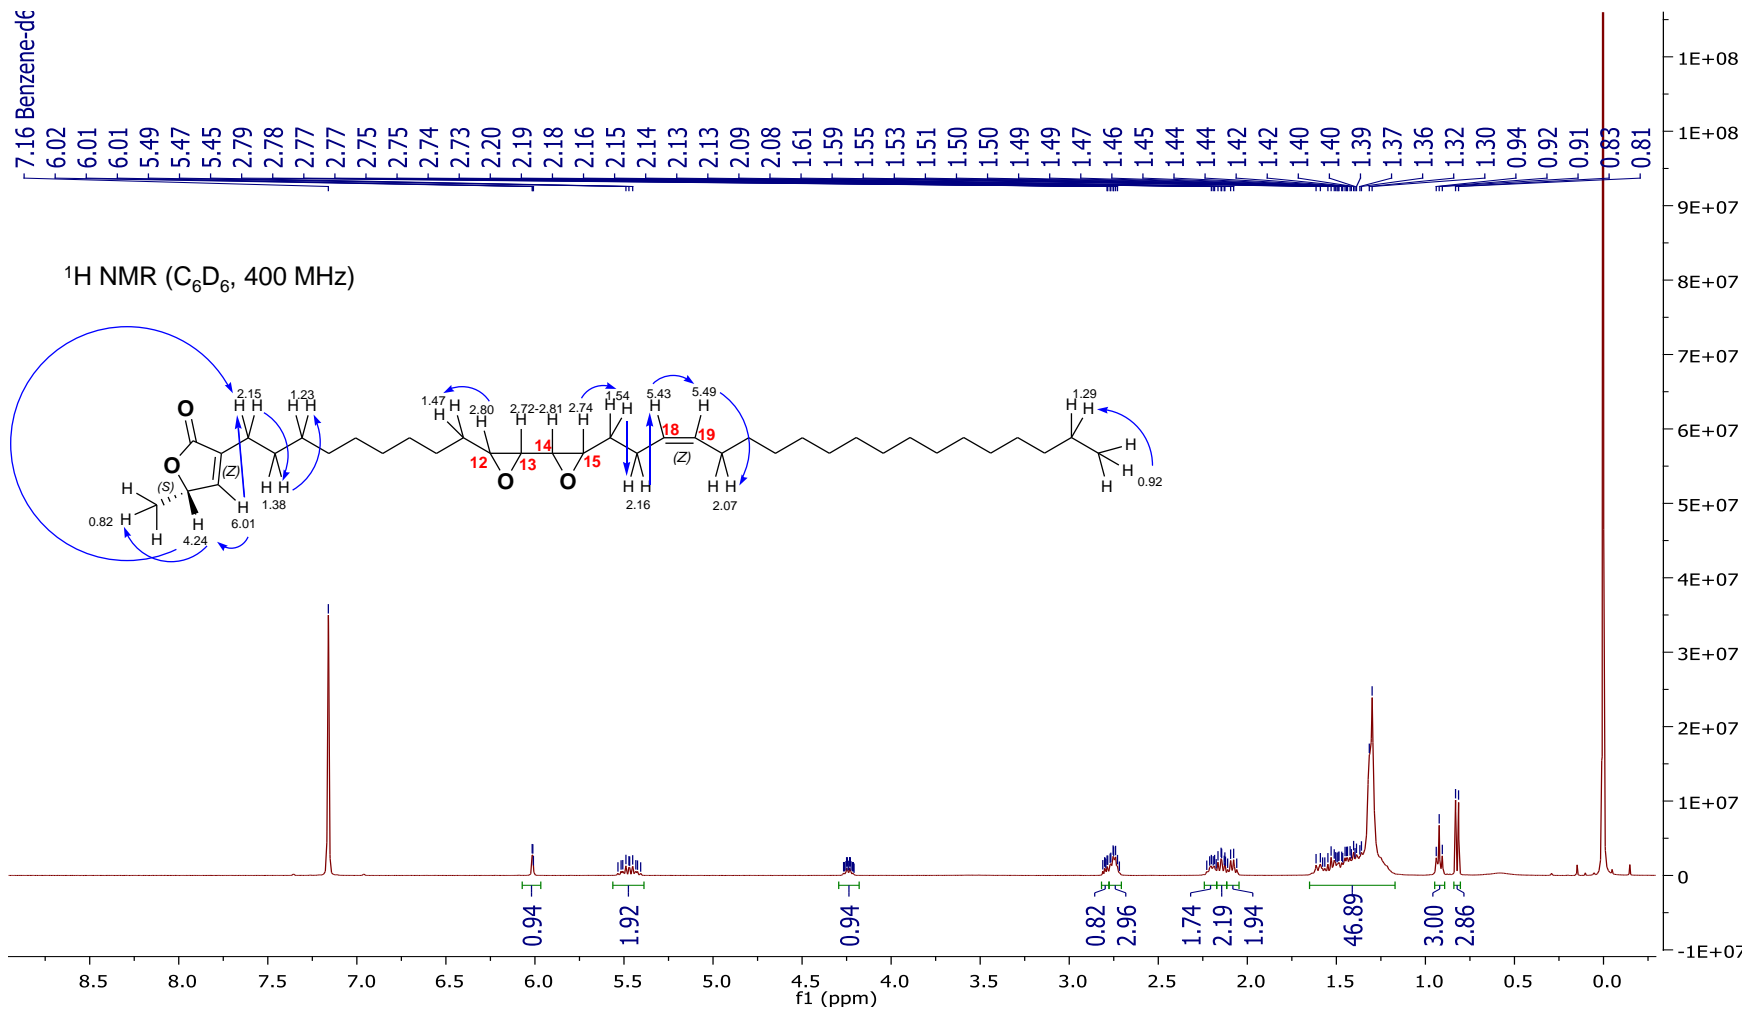

| Annopurpuricin E |                                |                                 |
|------------------|--------------------------------|---------------------------------|
| Experimental     | 6-311G(d,p)/B3LYP <sup>a</sup> | 6-311G(d,p)/ωB97XD <sup>b</sup> |
| 3013.76          | 3074.60                        | 3019.94                         |
| 2980.01          | 2981.73                        | 2983.53                         |
| 2951.08          | 2950.63                        | 2952.11                         |
| 2915.38          | 2919.36                        | 2915.83                         |
| 2848.85          | 2875.84                        | 2887.62                         |
| 1748.86          | 1767.87                        | 1806.92                         |
| 1655.92          | 1655.71                        | 1676.93                         |
| 1474.57          | 1460.26                        | 1469.09                         |
| 1462.03          | 1459.29                        | 1460.94                         |
| 1390.67          | 1383.38                        | 1418.87                         |
| 1310.07          | 1314.84                        | 1312.40                         |
| 1258.54          | 1260.01                        | 1256.49                         |
| 1207.43          | 1206.71                        | 1214.16                         |
| 1112.92          | 1126.46                        | 1111.95                         |
| 1069.52          | 1072.59                        | 1072.78                         |
| 1023.23          | 1024.15                        | 1024.42                         |
| 955.72           | 955.83                         | 954.35                          |
| 915.22           | 918.49                         | 925.69                          |
| 878.52           | 875.34                         | 879.21                          |
| 831.31           | 839.55                         | 844.90                          |
| 800.45           | 795.46                         | 806.31                          |
| 729.09           | 733.90                         | 734.66                          |
| 662.54           | 674.42                         | 637.94                          |

<sup>a</sup> Scaling factor of 0.9614

<sup>b</sup> Scaling factor of 0.957
